# Supplementary material for: Using natural language processing to extract self-harm and suicidality data from a clinical sample of patients with eating disorders: a retrospective cohort study
Source: PubMed Central journal article supplement — BMJ Open. 2021 Dec 31;11(12):e053808. doi: 10.1136/bmjopen-2021-053808 (PMC8720985; doi:10.1136/bmjopen-2021-053808), 2021-12-31
Supplement: bmjopen-2021-053808.draft_revisions.pdf [file bmjopen-2021-053808.draft_revisions.pdf]

# BMJ Open

BMJ Open is committed to open peer review. As part of this commitment we make the peer review history of every article we publish publicly available.

When an article is published we post the peer reviewers' comments and the authors' responses online. We also post the versions of the paper that were used during peer review. These are the versions that the peer review comments apply to.

The versions of the paper that follow are the versions that were submitted during the peer review process. They are not the versions of record or the final published versions. They should not be cited or distributed as the published version of this manuscript.

BMJ Open is an open access journal and the full, final, typeset and author-corrected version of record of the manuscript is available on our site with no access controls, subscription charges or pay-per-view fees (<http://bmjopen.bmj.com>).

If you have any questions on BMJ Open's open peer review process please email [info.bmjopen@bmj.com](mailto:info.bmjopen@bmj.com)

# BMJ Open

## Using natural language processing to extract self-harm and suicidality data from a clinical sample of patients with eating disorders: a retrospective cohort study

|                               |                                                                                                                                                                                                                                                                                                                                                                                                                                                                                                                                                           |
|-------------------------------|-----------------------------------------------------------------------------------------------------------------------------------------------------------------------------------------------------------------------------------------------------------------------------------------------------------------------------------------------------------------------------------------------------------------------------------------------------------------------------------------------------------------------------------------------------------|
| Journal:                      | <i>BMJ Open</i>                                                                                                                                                                                                                                                                                                                                                                                                                                                                                                                                           |
| Manuscript ID                 | bmjopen-2021-053808                                                                                                                                                                                                                                                                                                                                                                                                                                                                                                                                       |
| Article Type:                 | Original research                                                                                                                                                                                                                                                                                                                                                                                                                                                                                                                                         |
| Date Submitted by the Author: | 26-May-2021                                                                                                                                                                                                                                                                                                                                                                                                                                                                                                                                               |
| Complete List of Authors:     | cliffe, charlotte; King's College London, Biomedical research council<br>Seyedsalehi, Aida; Cambridge University<br>Vardavoulia, Katerina; King's College London<br>Bittar, André<br>Velupillai, Sumithra; Kings College London, Institute of Psychiatry, Psychology and Neuroscience<br>Shetty, Hitesh; South London and Maudsley NHS Foundation Trust, Biomedical Research Centre Nucleus<br>Schmidt, Ulrike; Institute of Psychiatry, KCL, Eating Disorders<br>Dutta, Rina; Kings College London, Institute of Psychiatry, Psychology and Neuroscience |
| Keywords:                     | Eating disorders < PSYCHIATRY, Suicide & self-harm < PSYCHIATRY, BIOTECHNOLOGY & BIOINFORMATICS, EPIDEMIOLOGY                                                                                                                                                                                                                                                                                                                                                                                                                                             |
|                               |                                                                                                                                                                                                                                                                                                                                                                                                                                                                                                                                                           |

SCHOLARONE™  
Manuscripts

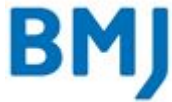

I, the Submitting Author has the right to grant and does grant on behalf of all authors of the Work (as defined in the below author licence), an exclusive licence and/or a non-exclusive licence for contributions from authors who are: i) UK Crown employees; ii) where BMJ has agreed a CC-BY licence shall apply, and/or iii) in accordance with the terms applicable for US Federal Government officers or employees acting as part of their official duties; on a worldwide, perpetual, irrevocable, royalty-free basis to BMJ Publishing Group Ltd ("BMJ") its licensees and where the relevant Journal is co-owned by BMJ to the co-owners of the Journal, to publish the Work in this journal and any other BMJ products and to exploit all rights, as set out in our [licence](#).

The Submitting Author accepts and understands that any supply made under these terms is made by BMJ to the Submitting Author unless you are acting as an employee on behalf of your employer or a postgraduate student of an affiliated institution which is paying any applicable article publishing charge ("APC") for Open Access articles. Where the Submitting Author wishes to make the Work available on an Open Access basis (and intends to pay the relevant APC), the terms of reuse of such Open Access shall be governed by a Creative Commons licence – details of these licences and which [Creative Commons](#) licence will apply to this Work are set out in our licence referred to above.

Other than as permitted in any relevant BMJ Author's Self Archiving Policies, I confirm this Work has not been accepted for publication elsewhere, is not being considered for publication elsewhere and does not duplicate material already published. I confirm all authors consent to publication of this Work and authorise the granting of this licence.

1  
2  
3  
4  
5  
6  
7  
8 **Using natural language processing to extract**  
9 **self-harm and suicidality data from a**  
10 **clinical sample of patients with eating**  
11 **disorders: a retrospective cohort study**  
12  
13  
14  
15  
16  
17

18 Charlotte Cliffe<sup>1</sup>, Aida Seyedsalehi<sup>1;2</sup>, Katerini Vardavoulia<sup>1</sup>,  
19 Andre Bittar<sup>1</sup>, Sumithra Velupillai<sup>1</sup>, Hitesh Shetty<sup>1</sup>, Ulrike  
20 Schmidt<sup>1</sup>, Rina Dutta<sup>1</sup>  
21

22  
23 1. Biomedical Research Council Nucleus; Kings College  
24 London; London, UK  
25  
26  
27  
28  
29  
30  
31  
32  
33  
34  
35  
36  
37  
38  
39  
40  
41  
42  
43  
44

45 *Corresponding author: Charlotte Cliffe,*  
46 *charlotte.cliffe@kcl.ac.uk; 07795341866; post to: BRC*  
47 *Nucleus; Kings College London; Denmark Hill; no fax number*  
48

49 **Key words:** self-harm, suicidality, eating disorders,  
50 electronic health records, natural language processing  
51

52 **Word count:** 3827  
53  
54  
55  
56  
57  
58  
59  
60

## Abstract

**Aim:** This study's aim was to determine risk factors for those diagnosed with eating disorders who report self-harm and suicidality.

**Method:** This study was a retrospective cohort study within a secondary mental health service, South London & Maudsley NHS Trust. All patients diagnosed with an F50 diagnosis of eating disorder from 01/2009-09/2019 were included. Electronic health records (EHRs) for these patients were extracted and natural language processing tools were used to determine documentation of either self-harm or suicidality in their clinical notes. These tools were validated manually for attribute agreement scores within this study.

**Results:** The attribute agreements for precision of positive mentions of self-harm were  $>0.90$  and for suicidality were  $>0.80$ ; this demonstrates a 'strong' and 'near perfect' agreement and highlights the reliability of the tools in identifying the EHRs reporting self-harm or suicidality. There were 7434 patients with EHRs available and diagnosed with eating disorders included in the study from the dates 01/2007 to 09/2019. Of these, 4591 (61.8%) had a mention of self-harm within their records and 4764 (64.0%) had a mention of suicidality; 3899 (52.4%) had mentions of both. Patients reporting either self-harm or suicidality were more likely to have a diagnosis of anorexia nervosa (self-harm, AN OR=3.44, 95% CI 1.05-11.3,  $p=0.04$ ; suicidality, AN OR=8.20, 95% CI 2.17-30.1;  $p=0.002$ ). They were also more likely to have a diagnosis of borderline personality disorder ( $p<0.001$ ), bipolar disorder ( $p<0.001$ ) or substance misuse disorder ( $p<0.001$ ).

**Conclusion:** A high percentage of patients ( $>60\%$ ) diagnosed with eating disorders report either self-harm or suicidal thoughts. Relative to other eating disorders, those diagnosed with anorexia nervosa were more likely to report either self-harm or suicidal thoughts. Psychiatric comorbidity, in particular borderline personality disorder and substance misuse were also associated with an increase risk in self-harm and suicidality. Therefore, risk assessment amongst patients diagnosed with eating disorders is crucial.

### Article Summary: Strengths and Limitations of this study

1. The size of the cohort is over 7400 patients
2. Long period of follow up (12.5 years)
3. Limited number of study designs (most cross sectional) reporting on suicidal behaviour amongst those with EDs
4. The tools used to detect self-harm and suicidality are not able to consider the temporality in relation to the ED diagnosis; therefore, the suicidal behaviour could have been detected prior to diagnosis

[Type here]

1

1  
2  
3 5. The clinical records are routine clinical data not  
4 primarily collected for research therefore rely on  
5 clinician documentation.  
6  
7  
8  
9  
10  
11

## 12 **Introduction**

13  
14 Patients diagnosed with eating disorders (EDs), including  
15 anorexia nervosa (AN), bulimia nervosa (BN) and eating  
16 disorder not otherwise specified (EDNOS)<sup>1</sup> are at a greater risk  
17 of mortality compared to the general population (1, 2). A  
18 major contribution to this increased mortality rate is the  
19 higher risk of completed suicide in patients with EDs (3).  
20 Individuals with a lifetime diagnosis of AN and BN are 18 and  
21 7 times more likely to die from suicide compared to age-  
22 matched general population controls, respectively (4, 5).  
23 Those with a diagnosis of EDNOS are 4 times more likely to  
24 complete suicide (6). Therefore, given the elevated risk of  
25 suicide amongst patients diagnosed with EDs, it is of utmost  
26 importance that factors associated with this risk are  
27 determined (7).  
28  
29

30 Self-harm and suicidal ideation are both strong  
31 predictors of subsequent suicide (8). Self-harm can be defined as  
32 'self-injurious behaviour characterised by deliberate harm to  
33 the body in the absence of an intent to die' (9) and suicidal  
34 ideation can be defined as 'thoughts about killing oneself,  
35 which may or may not include a plan' (10). It has been  
36 determined that a common antecedent for completed suicide in  
37 the general population, is previous self harm, with up to 60%  
38 of people who complete suicide having previously self-harmed,  
39 the majority within one year prior to the attempt (11, 12).  
40 Lifetime suicidal ideation is also associated with attempted  
41 suicide (up to 30%); those with a plan have an increased risk  
42 of completed suicide (up to 55%) and the majority of attempts  
43 occur within the first year of the onset of suicidal ideation  
44 (13). Therefore, identifying patients who report either  
45 lifetime suicidal ideation and self-harm is an important  
46 clinical marker for those at risk of later suicide.  
47  
48

49 Previous studies have demonstrated the association  
50 between suicidality, self-harm and EDs (14-17). Our previous  
51 study focusing on suicide attempts, demonstrated the  
52 cumulative 10-year incidence of suicide attempts in a  
53 population of patients with EDs as 6.8% (17). Rates of self-  
54 harm have been reported as high as 42% for AN, up to 55% for  
55 bulimia nervosa BN (18) and 26% for EDNOS (19). A recent meta-  
56  
57  
58

---

59 <sup>1</sup> The DSM-V now refers to 'Otherwise specified feeding or eating disorder' (OFSED); but the studies and data  
60 included in this paper used the DSM-IV equivalent term of EDNOS.

1  
2  
3 analysis summarised that 22% of patients with AN and 33% of  
4 patients with BN reported lifetime self-harm (20).

5  
6 Studies have reported mixed findings in terms of suicide  
7 attempts across ED diagnostic categories (21-24), with many  
8 showing no difference in suicide attempts between ED subtypes,  
9 some demonstrated higher rates of suicide attempts and self-  
10 harm in AN compared to BN (17, 23, 25, 26) and others reported  
11 more frequent suicide attempts and ideation in BN compared to  
12 AN (24, 27). Furthermore, binge eating disorder (BED), a  
13 relatively new diagnostic category, has also been associated  
14 with increased suicidality (22). In other studies it appears  
15 that binge eating and purging are particularly associated with  
16 increased risks of attempted suicide, due to their association  
17 with impulsivity (26, 28). Some of these heterogenous findings  
18 have been attributed to differences in patient settings  
19 (outpatient or inpatient) (21), diagnostic subtyping (e.g.  
20 restricting vs binge-purging AN) (28) or the methods used for  
21 determining suicide attempts (26).

22  
23  
24 Some studies have focused on risk factors for developing  
25 suicidal behaviour amongst those with EDs. A number of risk  
26 factors have been identified, such as younger age of ED onset,  
27 specific personality traits, comorbid disorders, negative life  
28 events and substance misuse (17, 26, 29). However, there are  
29 limitations with a number of past studies in terms of low  
30 numbers of suicidal behaviour within the study population,  
31 resulting in low power (5). One possibility to improve this  
32 problem is to use longitudinal psychiatric case records, such  
33 as electronic health records (EHRs). This captures a large  
34 enough population manifesting suicidal behaviour, to ensure a  
35 sufficiently powered study (30).

36  
37 The increasing use of EHRs in hospital care systems,  
38 alongside the growth of health informatics allows us to  
39 develop computational tools that can analyse these large  
40 clinical datasets (31). Natural language processing (NLP)  
41 tools allow us to determine information about symptomatology  
42 from information written in free-text EHRs (32). Previous  
43 research has shown that using NLP applications increases the  
44 positive predictive value of detecting patient-level  
45 suicidality (33). This is of particular use for suicidal  
46 behaviour, as both positive and negated mentions of  
47 suicidality and self-harm are routinely reported within free  
48 text during psychiatric assessments and follow-up (31, 34, 35).

49  
50 The aim of this study was to evaluate two NLP approaches  
51 that identify both self-harm and suicidality in the clinical  
52 records for a cohort of ED patients. To achieve this, we  
53 compared the performance of the NLP tools against a gold-  
54 standard set of manually annotated documents, using previously  
55 defined coding rules. We then used the tools to identify  
56 positive mentions of either self-harm or suicidality on a  
57 patient level, to evaluate the incidence of self-harm and  
58  
59  
60

1  
2  
3 suicidality in patients diagnosed with eating disorders over a  
4 12-year period.  
5

## 6 **Methods**

### 7 **Study Design and Setting**

8  
9 This study is a retrospective cohort study using data  
10 obtained from South London and Maudsley National Health  
11 Service Foundation trust (SLaM). This is a mental health  
12 service serving an estimated population of 2 million residents  
13 of southeast London. Patients come from the London boroughs of  
14 Croydon, Southwark, Lambeth, Lewisham, Bromley, Bexley and  
15 Greenwich. SLaM has had fully electronic records since 2006  
16 and the National Institute for Health Research funded  
17 Biomedical Research Centre supports the infrastructure for  
18 rendering its anonymised records available for research.  
19  
20  
21

### 22 **Inclusion criteria and exposures**

23 The analysed cohort was extracted via the Clinical Record  
24 Interactive Search (CRIS) system (36) and comprised of  
25 individuals who received an International Classification of  
26 Diseases, 10<sup>th</sup> Revision (ICD-10) (37) diagnosis of an ED  
27 (F50.0-F50.9) within the 12-year observation period of 1  
28 January 2007 to 31 September 2019. These patients were  
29 extracted using two methods available within the EHRs. First,  
30 structured information on diagnosis was extracted from drop  
31 down fields in the source record. Second, data were extracted  
32 from open text fields using a bespoke algorithm generated by  
33 the Generalised Architecture for Text Engineering (GATE)  
34 software. The comorbidity exposures of interest were diagnoses  
35 of substance misuse (F10-F19), bipolar disorder (F31), anxiety  
36 disorders, depression (F32 and F33) and personality disorder  
37 (F60) determined by structured information on the EHRs in the  
38 drop-down fields in the source record.  
39  
40  
41  
42  
43

### 44 **Primary outcomes**

45 The outcomes of interest were a patient reporting at  
46 least one positive mention of self-harm or one positive  
47 mention of suicidality. Information on these outcomes was  
48 extracted using NLP applications that have been previously  
49 developed and used within similar datasets (31, 34, 35). The  
50 first application assessed for positive mentions of self-harm  
51 (SH), this included historic and current episodes, but did not  
52 include self-harm ideation. The second application included  
53 suicidal ideation (SUI) of both a passive and active nature;  
54 both of these were recorded as a binary outcome.  
55  
56  
57  
58  
59

### 60 **Workflow for validating the NLP tools**

[Type here]



1  
2  
3 **Figure 1** shows the workflow for validating the NLP tools  
4 to determine the primary outcomes. All F50 diagnoses between  
5 1<sup>st</sup> Jan 2007 and 31<sup>st</sup> March 2019 were included in the  
6 validation; this period of time was 6 months shorter than the  
7 final analysis due to the lag time between the validation and  
8 final statistical analysis. In total, 7,188 patients met the  
9 inclusion criteria, of which 6,972 had at least one EHR  
10 document available. Overall, **1,054,640** documents were  
11 available for these patients. For all 6,972 patients, the NLP  
12 tools were used to search for mentions of both suicidality and  
13 self-harm. In total, 5,456 patients had positive mentions of  
14 either SH or SUI, 4741 had any mention of SH, 4528 had any  
15 mention of SUI, and 3813 patients had both SH and SUI  
16 mentioned. Manual annotations were compared to the NLP tool  
17 annotations and attribute agreements were calculated (38).

18  
19 From these patients, a sample of documents was randomly  
20 extracted. This was achieved by firstly restricting the  
21 patients to those who had a number of EHR documents within the  
22 1<sup>st</sup> and 3<sup>rd</sup> quartiles, to eliminate outliers with very few  
23 documents or with excessive documentation. This resulted in  
24 2923 patients in total with positive mentions of either SH or  
25 SUI (**135,317** documents), 2431 patients with a positive mention  
26 of SH (**114,962** documents), 2294 patients with a positive  
27 mention of SUI (**110,399** documents), and 1802 patients with a  
28 positive mention of both SH and SUI (**90,044** documents). Each  
29 patient had a minimum of 17 documents and maximum of 99  
30 documents.

31  
32 A randomised sample of 500 documents was taken for manual  
33 review: 100 with a positive mention of suicidality only, 100  
34 with a positive mention of self-harm only, 100 with a mention  
35 of both self-harm and suicidality and 200 with no mention of  
36 either. Three manual coders, including one clinically trained  
37 psychiatrist (CC, AS, AV), were assigned either suicidality  
38 (AS, 400 documents), self-harm (AV, 400 documents) or both  
39 (CC, 500 documents) for review. The sets were independently  
40 classified with 300 of them crossing over and classified by  
41 all three authors.

42  
43 For the suicidality documents, two coders (CC and AS)  
44 independently labelled each document as suicidal, non-suicidal  
45 or uncertain. Inter-rater agreement was measured using Cohen's  
46 Kappa and the F1 statistic on a document level to determine  
47 interrater reliability (38). Any discrepancies were discussed  
48 and clarified to develop a 'gold standard' set of documents.  
49 The same principle was applied to mentions of self-harm within  
50 the documents, determined by two coders (CC, AV). Any mention  
51 of self-harm within the document was coded as positive,  
52 negative and whether relevant, non-relevant, for example the  
53 mention was about a friend or family member that was not  
54 relevant to the patient, or uncertain (see Figure 1).

## 55 56 57 58 59 60 **Testing the Algorithms**

[Type here]

1  
2  
3 The performance of each NLP tool was tested by comparing  
4 the output of the application against the 'gold standard' set  
5 of manual annotations and calculating precision (positive  
6 predictive value; PPV) and recall (sensitivity) statistics.  
7 Good inter-rater agreement between the NLP output and gold-  
8 standard was indicated by a Cohen's kappa of 0.80 for  
9 identifying both suicidality and self-harm. Scores > 0.80  
10 demonstrate a 'strong' level of agreement and reliable data,  
11 scores > 0.90 are 'almost perfect' agreement and scores > 0.60  
12 were considered 'moderate' in agreement (38).  
13  
14  
15  
16

### 17 **Figure 1: Workflow for validation of both NLP tools**

18  
19  
20

#### 21 **Covariates**

22 The year and month of birth, gender, ethnicity,  
23 deprivation score and marital status were retrieved from the  
24 CRIS database. Age in years was calculated from the  
25 individual's first eating disorder diagnosis in the  
26 observation window or from January 2007 if the diagnosis  
27 preceded the observation period.  
28  
29

#### 30 **Patient and Public involvement**

31 There was no patient and public involvement in the development  
32 of the manuscript.  
33  
34

#### 35 **Statistical analysis**

36 Analysis was completed using Stata software. All patients  
37 were eligible for analysis. Descriptive statistics were used  
38 to characterise the patients. Logistic regression was used to  
39 calculate odd ratios with 95% confidence intervals with self-  
40 harm or suicidality as the 'outcome' and the comorbid  
41 psychiatric diagnoses as exposure. ED diagnoses were  
42 categorised into AN (both restricting and purging types), BN,  
43 and all other F50 diagnoses. For those with multiple  
44 diagnoses, a diagnostic hierarchy of AN>BN>other was used. The  
45 observation period started from the first date of diagnosis or  
46 1 Jan 2007 if the diagnosis was made prior to this date and  
47 the ended on the 31 September 2019. Univariate logistic  
48 regression was used to estimate the effect of the primary ED  
49 diagnosis, demographic characteristics and psychiatric  
50 comorbidities on each of the outcomes of interest (SH and  
51 SUI). Next, multivariable analyses were performed to calculate  
52 the adjusted odds ratio (OR) and 95% confidence interval (CI)  
53 for each comorbid psychiatric diagnosis, whilst controlling  
54 for demographics and the ED diagnosis. the effect of the  
55 psychiatric comorbidities and demographics.  
56  
57  
58  
59  
60

[Type here]

## Results

### Descriptive Statistics

A total of 7434 patients with ED diagnoses were identified by the CRIS system between 1 Jan 2007 and 31 September 2019; 4591 (61.8%) had a mention of self-harm and 4764 (64.0%) had a mention of suicidality; 3899 (52.4%) had mentions of both. Of the 7434 patients, 2553 (34.3%) had a diagnosis of AN, 1572 (21.2%) a diagnosis of BN, and 3298 (44.4%) a diagnosis of other EDs (including binge eating disorder, EDNOS, otherwise unspecified) and 11 (<1%) had no information about the type of ED diagnosis. The mean age was 26.0 (SD 11; range 10-90) (see Table 1).

**Table 1: Summary of all diagnoses by age group** (11 patients had no detailed information about the diagnosis other than 'F50')

| Age group<br>Years,<br>(n)% total                             | AN              | BN                 | EDNOS           |
|---------------------------------------------------------------|-----------------|--------------------|-----------------|
| <10 (39) <1%                                                  | 4 (<1%)         | 0                  | 35 (1.1%)       |
| 10-19 (2572)<br>34.6%                                         | 1250<br>(49.0%) | 320<br>(20.4<br>%) | 1002<br>(30.4%) |
| 20-29 (2720)<br>36.6%                                         | 807<br>(31.6%)  | 714<br>(45.4<br>%) | 1199<br>(36.4%) |
| 30-39 (1233)<br>16.6%                                         | 276<br>(10.8%)  | 354<br>(22.5<br>%) | 603<br>(18.3%)  |
| 40-49 (527)<br>7.10%                                          | 118<br>(4.62%)  | 122<br>(7.76<br>%) | 287<br>(8.70%)  |
| 50+ (332)<br>4.47%                                            | 98<br>(3.84%)   | 62<br>(3.94<br>%)  | 172<br>(5.22%)  |
| <b>TOTAL</b><br>n= 7423 (11<br>missing detailed<br>diagnosis) | <b>2553</b>     | <b>1572</b>        | <b>3298</b>     |

### Self-harm and Suicidality amongst patients

The attribute agreements for the final corpus of documents on self-harm and suicidality are displayed below in

[Type here]

7

Table 2. The three attributes include 'positive' ie there is a mention of either self-harm or suicidality, 'negative or non' ie there is a denial of self-harm or suicidality and 'relevant' i.e. the mention is relevant to the patient and not a family member or friend. A summary of those reporting self-harm or suicidality by age are displayed in Table 3.

**Table 2: Attribute agreements:** attribute agreements reflect the comparison of the NLP tool output to the gold standard set of manually annotated documents.

|               | Positive suicidal<br>ity | Relevant<br>document<br>s for<br>suicidal<br>ity | Non-<br>suicida<br>l<br>documen<br>ts | Positi<br>ve for<br>self-<br>harm | Relevan<br>t<br>documen<br>ts for<br>self-<br>harm | Negati<br>ve for<br>self-<br>harm |
|---------------|--------------------------|--------------------------------------------------|---------------------------------------|-----------------------------------|----------------------------------------------------|-----------------------------------|
| Precisi<br>on | 0.80                     | 0.98                                             | 0.58                                  | 0.96                              | 0.89                                               | 0.59                              |
| Recall        | 0.82                     | 0.91                                             | 0.87                                  | 0.91                              | 0.72                                               | 0.79                              |
| F1-<br>score  | 0.81                     | 0.95                                             | 0.70                                  | 0.94                              | 0.80                                               | 0.68                              |

**Table 3: Self harm and suicidality reported amongst patients by age**

| Age group, years | Self- harm present during<br>follow up period, n (%) | Suicidality present, n (%) |
|------------------|------------------------------------------------------|----------------------------|
| <10              | 16 (<1%)                                             | 15 (<1%)                   |
| 10-19            | 1914 (41.7%)                                         | 1928 (40.5%)               |
| 20-29            | 1489 (32.4%)                                         | 1553 (32.6%)               |
| 30-39            | 675 (14.7%)                                          | 722 (15.2%)                |
| 40-49            | 310 (6.75%)                                          | 168 (6.75%)                |
| 50+              | 187 (4.1%)                                           | 134 (5.38%)                |

[Type here]

8

|              |             |             |
|--------------|-------------|-------------|
| <b>TOTAL</b> | <b>4591</b> | <b>4520</b> |
|--------------|-------------|-------------|

### Self-harm-reported amongst patients with eating disorders

Patients who reported self-harm (past or present) were more likely to be younger in age (OR = 0.98, 95% CI 0.97-0.98; P<0.001), less likely to be female (OR = 0.67, 95% CI 0.58-0.79; P<0.001) more likely to be of white ethnicity (OR = 1.40, 95% CI 1.10-1.78; p=0.006), and more likely to have a diagnosis of AN (OR = 3.44, 95% CI 1.05-11.3; p=0.04). They were also more likely to have a comorbid diagnosis; in particular a diagnosis of borderline personality disorder (BPD; OR = 54.2, 95% CI 24.2-121.4; p<0.001), bipolar disorder (OR = 9.57, 95% CI 5.57-15.4; p<0.001) and substance misuse (OR = 7.22, 95% CI 2.94- 18.3; p<0.001); as displayed in Table 4.

**Table 4: Univariable logistic regression to determine the effect of demographics, primary ED diagnosis, and psychiatric comorbidities on risk of self-harm**

| Variables                | Number (%)<br>Age=Mean<br>+/- SD | Self harm<br>n (% of<br>group) | Unadjusted Odds Ratio | P value |
|--------------------------|----------------------------------|--------------------------------|-----------------------|---------|
| <b>Age (years)</b>       | 26.0 (11.0)                      | 4591                           | 0.98 (0.97-0.98)      | <0.001  |
| <b>Gender</b>            | 6635                             | 4252                           | ref                   |         |
| Female                   | (91.5%)                          | (58.6%)                        |                       |         |
| Male                     | 613 (8.5%)                       | 334 (4.6%)                     | 0.67 (0.58-0.79)      | <0.001  |
| <b>Marital Status</b>    |                                  |                                |                       |         |
| Single                   | 5081<br>(70.1%)                  | 3,341<br>(46.0%)               | ref                   |         |
| Married/partner          | 724 (9.98%)                      | 429<br>(5.91%)                 | 0.76 (0.65 -0.89)     | P=0.001 |
| Separate/divorced/widow  | 200 (2.76%)                      | 122<br>(1.68%)                 | 0.81 (0.61-1.1)       | P=0.17  |
| Not known                | 1248<br>(17.7%)                  | 699<br>(9.64%)                 | n/a                   | n/a     |
| <b>Ethnicity</b>         |                                  |                                |                       |         |
| White                    | 6,008<br>(84.5%)                 | 3752<br>(53.8%)                | 1.40 (1.10-1.78)      | 0.006   |
| Black                    | 344 (4.84%)                      | 239<br>(3.50%)                 | 1.26 (0.94-1.68)      | 0.12    |
| South Asian              | 219 (3.1%)                       | 149<br>(2.17%)                 | 1.06 (0.86-.1.30)     | 0.59    |
| Mixed and other          | 428 (6.0%)                       | 273<br>(3.97%)                 | 0.81 (0.53-1.25)      | 0.34    |
| Unknown                  | 115 (1.6%)                       | 51 (<1%)                       | n/a                   | n/a     |
| <b>Deprivation Score</b> |                                  |                                |                       |         |

[Type here]

|                                        |                 |                 |                   |        |
|----------------------------------------|-----------------|-----------------|-------------------|--------|
| Group 1                                | 2001<br>(26.9%) | 1240<br>(27.0%) | ref               |        |
| Group 2                                | 2897<br>(39.0%) | 1778<br>(38.7%) | 0.88 (0.83-1.11)  | 0.83   |
| Group 3                                | 2514<br>(33.8%) | 1559<br>(34.0%) | 1.00 (0.88-1.13)  | 0.99   |
| Not known                              | 22 (<1%)        | 14 (<1%)        | 1.34 (0.52-3.51)  | 0.54   |
| <b>Primary ED diagnosis</b>            |                 |                 |                   |        |
| AN                                     | 2553<br>(34.4%) | 1876<br>(40.9%) | 3.44 (1.05-11.3)  | 0.04   |
| BN                                     | 1572<br>(21.2%) | 973<br>(21.2%)  | 2.28 (0.69-7.52)  | 0.17   |
| EDNOS                                  | 3298<br>(44.4%) | 1737<br>(37.8%) | 1.40 (0.43-4.59)  | 0.55   |
| Unknown/other?                         | 181 (2%)        | 5 (<1%)         | n/a               | n/a    |
| <b>All substance misuse</b>            |                 |                 |                   |        |
| None                                   | 2644<br>(99.3%) | 4398<br>(95.8%) | ref               |        |
| Alcohol                                | 13 (<1%)        | 132<br>(2.89%)  | 6.10 (3.44-10.8)  | <0.001 |
| Substance misuse                       | 5 (<1%)         | 61 (1.33%)      | 7.22 (2.94- 18.3) | <0.001 |
| <b>Depression</b>                      |                 |                 |                   |        |
| No                                     | 2532<br>(95.1%) | 3777<br>(82.3%) | ref               |        |
| Yes                                    | 130 (4.89%)     | 814<br>(17.7%)  | 4.20 (3.46-5.01)  | <0.001 |
| <b>Anxiety disorders</b>               |                 |                 |                   |        |
| No                                     | 2642<br>(99.3%) | 4503<br>(98.1%) | ref               |        |
| Yes                                    | 20 (<1%)        | 88 (1.92%)      | 2.58 (1.58-4.21)  | <0.001 |
| <b>Borderline Personality Disorder</b> |                 |                 |                   |        |
| No                                     | 2656<br>(99.8%) | 4090<br>(89.1%) | ref               |        |
| Yes                                    | 6 (<1%)         | 501<br>(10.9%)  | 54.2 (24.2-121.4) | <0.001 |
| <b>Other Personality Disorder</b>      |                 |                 |                   |        |
| No                                     | 2649<br>(99.5%) | 3939<br>(85.8%) | ref               |        |
| Yes                                    | 13 (<1%)        | 652<br>(14.2%)  | 33.7 (19.4-58.5)  | <0.001 |
| <b>Bipolar Disorder</b>                |                 |                 |                   |        |
| No                                     | 2648<br>(99.5%) | 4370<br>(95.2%) | ref               |        |
| Yes                                    | 14 (<1%)        | 221<br>(4.81%)  | 9.57 (5.57-15.4)  | <0.001 |

[Type here]

10

### Suicidality reported amongst patients with eating disorders

Patients who reported suicidality were more likely to be younger (OR = 0.98, 95% CI 0.97-0.99;  $p < 0.001$ ), of white ethnicity (OR=1.59, 95% CI 1.23-2.10;  $p < 0.001$ ), less likely to be married or with a partner (OR=0.76, 95% CI 0.65-0.90;  $p = 0.001$ ) and have a diagnosis of AN (OR=8.20, 95% CI 2.17-30.1;  $p = 0.002$ ). They were also more likely to have a comorbid diagnosis, in particular BPD (OR = 26.2, 14.4-47.7;  $p < 0.001$ ), bipolar disorder (OR = 9.31, 95% CI 5.31-16.3;  $P < 0.001$ ) and alcohol misuse (OR = 6.59, 95% CI 3.56-12.2;  $p < 0.001$ ), as seen in Table 5.

**Table 5: Univariable logistic regression to determine the effect of demographics, primary ED diagnosis, and psychiatric comorbidities on risk of suicidality**

| Variables                          | Number (%)<br>Age=Mean<br>+/- SD | Suicidality n<br>(% of<br>group) | Unadjusted Odds Ratio | P value |
|------------------------------------|----------------------------------|----------------------------------|-----------------------|---------|
| <b>Age (years)</b>                 | 26.1 (11.0)                      |                                  | 0.98 (0.97-0.99)      | <0.001  |
| <b>Gender %</b>                    | 6635                             | 4364 (65.8%)                     | ref                   |         |
| Female                             | (91.5%)                          |                                  |                       |         |
| Male                               | 613 (8.5%)                       | 395 (64.4%)                      | 0.94 (0.79-1.12)      |         |
| <b>Marital Status</b>              |                                  |                                  |                       |         |
| Single                             | 5081<br>(70.1%)                  | 3476 (72.3%)                     | ref                   |         |
| Married/partner                    | 724 (9.98%)                      | 451 (9.47%)                      | 0.76 (0.65 -0.90)     | P=0.001 |
| Separate/divorced/widow            | 200 (2.76%)                      | 131 (2.75%)                      | 0.88 (0.65-1.18)      | P=0.39  |
| Not known                          | 1248<br>(17.7%)                  | 706 (14.8%)                      | n/a                   | n/a     |
| <b>Ethnicity</b>                   |                                  |                                  |                       |         |
| White                              | 6,008<br>(84.5%)                 | 3907 (84.3%)                     | 1.59 (1.23-2.10)      | <0.001  |
| Black                              | 344 (4.84%)                      | 255 (5.5%)                       | 1.03 (0.77-1.37)      | 0.84    |
| South Asian                        | 219 (3.1%)                       | 145 (3.13%)                      | 0.97 (0.79-1.20)      | 0.80    |
| Mixed and other                    | 428 (6.0%)                       | 276 (5.95%)                      | 0.76 (0.49-1.17)      | 0.21    |
| Unknown                            | 115 (1.6%)                       | 52 (1.12%)                       | n/a                   | n/a     |
| <b>Deprivation Score</b>           |                                  |                                  |                       |         |
| Group 1                            | 2001<br>(26.9%)                  | 1300 (27.3%)                     | ref                   |         |
| Group 2                            | 2897<br>(39.0%)                  | 1829 (38.9%)                     | 0.93 (0.83-1.06)      | 0.27    |
| Group 3                            | 2514<br>(33.8%)                  | 1623 (34.1%)                     | 0.98 (0.86-1.11)      | 0.75    |
| Not known                          | 22 (<1%)                         | 12 (<1%)                         | 0.76 (0.31-1.87)      | 0.54    |
| <b>Presence of eating Disorder</b> |                                  |                                  |                       |         |
| AN                                 | 2553<br>(34.4%)                  | 1909 (75.5%)                     | 8.20 (2.17-30.1)      | 0.002   |
| BN                                 | 1572<br>(21.2%)                  | 1005 (67.7%)                     | 4.49 (1.48-21.2)      | 0.01    |

[Type here]

1

|                                        |                 |              |                   |        |
|----------------------------------------|-----------------|--------------|-------------------|--------|
| EDNOS                                  | 3298<br>(44.4%) | 1847 (57.2%) | 3.57 (0.94-13.47) | 0.06   |
| unknown                                | 11 (<1%)        | 3 (<1%)      | n/a               | n/a    |
| <b>All substance misuse</b>            |                 |              |                   |        |
| None                                   | 2472<br>(99.3%) | 4570 (95.9%) | ref               |        |
| Alcohol                                | 11 (<1%)        | 134 (2.81%)  | 6.59 (3.56-12.2)  | <0.001 |
| Substance misuse                       | 6 (<1%)         | 60 (1.26%)   | 5.41 (2.33-12.5)  | <0.001 |
| <b>Depression</b>                      |                 |              |                   |        |
| No                                     | 2383<br>(95.7%) | 3926 (82.4%) | ref               |        |
| Yes                                    | 106 (4.26%)     | 838 (17.6%)  | 4.80 (3.90-5.91)  | <0.001 |
| <b>Borderline Personality Disorder</b> |                 |              |                   |        |
| No                                     | 2478<br>(99.6%) | 4268 (89.6%) | ref               |        |
| Yes                                    | 11 (<1%)        | 496 (10.4%)  | 26.2 (14.4-47.7)  | <0.001 |
| <b>Bipolar Disorder</b>                |                 |              |                   |        |
| No                                     | 2476<br>(99.5%) | 4542 (95.3%) | ref               |        |
| Yes                                    | 13 (<1%)        | 222 (4.67%)  | 9.31 (5.31-16.3)  | <0.001 |
| <b>Anxiety</b>                         |                 |              |                   |        |
| No                                     | 2476<br>(99.5%) | 4669 (98.0%) | ref               |        |
| Yes                                    | 13 (<1%)        | 95 (2.0%)    | 3.88 (2.17-6.93)  | <0.001 |
| <b>Other Personality Disorder</b>      |                 |              |                   |        |
| No                                     | 2472<br>(99.3%) | 4116 (86.4%) | ref               |        |
| Yes                                    | 17 (<1%)        | 648 (13.6%)  | 22.9 (14.1 -37.1) | <0.001 |

### **Multivariable analysis of the effect of comorbid psychiatric diagnoses on self-harm and suicidality**

When adjusting for demographics and the primary ED diagnosis, depression, bipolar disorder, other PD, substance misuse and alcohol use disorder remained significantly associated with suicidal behaviour. However, after adjusting for the demographics BPD remained only associated with self-harm (OR 2.84, 0.84-9.68, p=0.09) and not with suicidality (OR =1.52, 0.51-4.50, p=0.45). Anxiety disorders remained associated with suicidality (OR =1.93, 95% CI 1.01-3.69, p=0.05) but not self-harm (OR =1.47, 95% CI 0.81-2.65, p=0.20).

**Table 6 (i) Multivariable logistic regression examining the association between psychiatric comorbidities and self-harm; adjusted for demographics & ED diagnosis**

[Type here]

1.



| Comorbid diagnosis              | Adjusted Odds Ratio (95% CI) | P Value |
|---------------------------------|------------------------------|---------|
| Borderline Personality Disorder | 2.84 (0.84-9.64)             | 0.09    |
| Anxiety disorders               | 1.47 (0.81-2.65)             | 0.20    |
| Depression                      | 3.38 (2.72-4.21)             | <0.001  |
| Bipolar disorder                | 5.49 (2.97-10.2)             | <0.001  |
| Other PD                        | 13.3 (5.72-30.8)             | <0.001  |
| Alcohol                         | 5.26 (2.67-10.3)             | <0.001  |
| Substance misuse                | 4.35 (1.65-11.5)             | 0.003   |

**Table 6 (ii) Multivariable logistic regression examining the association between psychiatric comorbidities and suicidality: adjusted for demographics & ED diagnosis**

| Comorbid diagnosis              | Adjusted Odds Ratio (95% CI) | P Value |
|---------------------------------|------------------------------|---------|
| Borderline Personality Disorder | 1.52 (0.51-4.50)             | 0.45    |
| Anxiety disorders               | 1.93 (1.01-3.69)             | 0.05    |
| Depression                      | 3.62 (2.87-4.57)             | <0.001  |
| Bipolar disorder                | 5.07 (2.69-9.56)             | <0.001  |
| Other PD                        | 11.6 (4.94-26.5)             | <0.001  |
| Alcohol use disorder            | 5.75 (2.73-12.1)             | <0.001  |
| Substance misuse                | 2.84 (1.16-6.98)             | 0.02    |

## Discussion

### Accuracy of the NLP output

The attribute agreements for precision of positive mentions of self-harm were >0.90 and for suicidality were >0.80; this demonstrates a 'strong' and 'near perfect' agreement and when compared to manual annotations (38) demonstrating the validity of the tool. However, negative polarity appeared less accurate for both tools, which demonstrates that the NLP tools were better at picking up positive and relevant mentions of both self-harm and suicidality within the clinical notes, than negative mentions.

[Type here]

1.

1  
2  
3 As we are relying on at least one positive mention to  
4 ascertain those with any past or current history of suicidal  
5 behaviour, this is unlikely to significantly impact the  
6 validity of the results.  
7

### 8 **Discussion of clinical findings**

10  
11 This study highlights the high lifetime prevalence (>60%)  
12 of both self-harm and suicidality reported amongst those  
13 diagnosed with eating disorders in both inpatient and  
14 outpatient settings. One explanation for the high rates of  
15 suicidal behaviour is that patients with EDs are at an  
16 increased risk of psychiatric comorbidities (1, 2),  
17 particularly mood disorders, substance misuse and personality  
18 disorders (29, 39). It is well documented that patients with  
19 comorbidities are more likely to self-harm and attempt suicide  
20 (40, 41). However, studies have demonstrated that even when  
21 adjusted for comorbid disorders, the risk of suicidal  
22 behaviour remains higher in patients with EDs than in the  
23 general population and comorbid disorders just elevate that  
24 risk further (17, 39, 42).  
25

26  
27 In our study, psychiatric comorbidity was associated with  
28 increased suicidal behaviour. In particular, BPD was  
29 associated with highly elevated odds of self-harm and suicidality, prior to adjustment.  
30 When adjusted, BPD increased the odds of self-harm, but interestingly not suicidality;  
31 although this adjusted association could reflect a lack of statistical power, as the cell size was  
32 small and CIs wide. This is consistent with previous studies as BPD presents with emotional  
33 dysregulation and impulsivity; associated with self-harm and ED symptoms such as bingeing  
34 or purging (18, 43). Furthermore, psychotherapies aimed at supporting those diagnosed with  
35 BPD and self-harm have been shown to be effective at also supporting patients with a  
36 diagnosis of ED (44, 45).  
37

38  
39 Similarly, those with a diagnosis of alcohol or substance misuse had an elevated odds  
40 of reporting self-harm and suicidality. Substance and alcohol misuse are associated with  
41 impulsivity; impulsivity is associated with behaviours such as bingeing and purging and  
42 suicidal behaviour (46-48) which has been shown to increase risk of completed suicide (49,  
43 50). Bipolar Disorder was also significantly associated with a five-fold increase in odds of  
44 suicidal behaviour when adjusted for demographics and the primary ED diagnosis. This is  
45 consistent with previous studies demonstrating an increased risk of hospitalised suicide  
46 attempts in ED patients with bipolar disorder compared to those without (17).  
47

48  
49 Relative to BN and other EDs, AN presented with the highest risk of suicidal  
50 behaviour, particularly suicidality. This is consistent with previous studies reporting a higher  
51 prevalence of suicide attempts and completed suicide in individuals with AN compared to  
52 those with BN or other EDs (5, 17, 23). However, it is important to  
53 consider the number of studies reporting suicidal behaviour  
54 most prevalent in BN (24, 48, 51). One explanation for the  
55 difference between our results and the above findings is that  
56 the current study used a diagnostic hierarchy of AN>BN>EDNOS  
57 to assign a primary ED diagnosis to patients; we know there is  
58 a well-established diagnostic crossover between EDs, with 50%  
59 of patients initially being diagnosed with AN being re-  
60

[Type here]

1.

1  
2  
3 diagnosed with BN or AN-binge purge subtype (52). Evidence also  
4 indicates that individuals experiencing diagnostic cross-over may be at particularly elevated  
5 risk of suicidality (53). Therefore, there could be a subtype of particular interest; future  
6 investigations should focus on diagnostic flux and whether the suicidal behaviour risk  
7 correlates to fluctuating ED symptoms (26).  
8

9 This study highlights the importance of further understanding the shared mechanisms  
10 for suicidal behaviour and ED diagnosis. There are various explanations that  
11 have been hypothesised for the high risk of self-harm and  
12 suicidality; some studies have suggested there are shared  
13 genetic factors predisposing to both conditions (54, 55).  
14 Others suggest that emotional dysregulation is associated with  
15 EDs and others demonstrate that adjusting for comorbid  
16 psychiatric disorders weakens any association (22, 54, 55).  
17 Increased pain tolerance and fearlessness for death are other  
18 hypotheses for the increased risk amongst patients diagnosed  
19 with EDs (56). The interpersonal theory of suicide describes  
20 that a higher lethality attempt requires both a desire for  
21 death and capability for suicide; capability of suicide has  
22 been theorised as developing after gradual chronic exposure to  
23 painful ED behaviours and habituation to fear and pain (57,  
24 58). Therefore, extreme restrictive eating may differentiate  
25 AN from other EDs, increasing the capability of both self-harm  
26 and suicidality (58).  
27  
28  
29

### 30 **Strengths and limitations**

31  
32  
33 The main strengths of this study are the size of the  
34 cohort (>7400), the longitudinal study design and long period  
35 of time for follow up (12.5 years), facilitated by the use of  
36 the CRIS database. There is currently a limited body of  
37 research on correlates and risk factors for suicidal behaviour  
38 amongst ED patients and previous studies have small numbers  
39 and a high usage of cross-sectional studies as well as studies  
40 at risk of reporting bias (26). The NLP approach used to  
41 extract clinician documentation of self-harm and suicidality  
42 from narrative text in EHRs reduces the risk of reporting bias  
43 and allows access to detailed clinical information that would  
44 not be available from EHR structured fields (30, 35).  
45

46 The main limitation of this study is that the tools were  
47 not able to consider the timing of reported suicidality or  
48 self-harm relative to the ED diagnosis. Therefore, it is  
49 possible the reported suicidal behaviour was prior to ED  
50 diagnosis; an improvement of the NLP tool would be to include  
51 temporality to understand specific time periods of risk for  
52 self-harm or reported suicidality. Another consideration is  
53 that due to changing diagnostic codes between the follow up  
54 period of 2007-2020 and the introduction of the ICD-11 codes  
55 of binge eating disorder, we had to include all EDs aside from  
56 AN and BN into one heterogenous group of diagnoses 'Other  
57 EDs'. This was needed to ensure consistency over the time  
58 period and to avoid the problem of small group sizes in the  
59  
60

[Type here]

1.

1  
2  
3 regression analysis. Finally, given that EHRs include routine  
4 clinical data not primarily collected for research purposes,  
5 the study relies on clinician documentation which could  
6 include non-grammatical errors, jargon and idiosyncratic  
7 abbreviations; all of these could increase the chance of NLP  
8 misclassification (35). However, this was mitigated by using  
9 all documents available for each patient. Therefore, there  
10 were multiple opportunities to capture suicidality information  
11 to compensate for lack of sensitivity of the tool.  
12  
13

### 14 **Clinical and research implications**

15 This study highlights the importance of risk assessment  
16 screening in all patients diagnosed with EDs, with a particular  
17 emphasis on those diagnosed with AN and ED patients with  
18 comorbid psychiatric diagnoses. This study also highlights the  
19 potential use of EHR databases to further suicidality and  
20 self-harm research by utilising NLP techniques. These tools  
21 could potentially have use with further development in risk  
22 prediction within ED services; their use along clinician  
23 reported decisions could help predict future suicidal  
24 behaviour in ED patients (13, 30).  
25  
26

27  
28 **Funding statement:** This research did not receive a specific  
29 grant, but the primary researcher CC was supported by an NIHR  
30 Academic Clinical Fellowship training post and with support  
31 from the Biomedical Research Centre at the IoPPN.  
32

33 **Competing interests:** nil

34 **Author's contribution:** CC led the project, conducted the data  
35 analysis and wrote the final manuscript; RD and US helped  
36 support the project title and review the final script; KV and  
37 AS conducted data analysis and supported the final manuscript;  
38 AB, SV and HS conducted data abstraction and expertise with  
39 NLP analysis.  
40

### 41 **Ethical Approval and Data Availability**

42 The CRIS database has received ethical approval for secondary analysis: Oxford REC C,  
43 reference 18/SC/0372. The data is made available under specific governance requirements:  
44 researchers need to have a contract with the South London and Maudsley NHS Trust, which  
45 can be applied for relevant research studies. Each research project is reviewed by a service-  
46 user led oversight committee of the National Institute of Health Research Biomedical  
47 Research Centre. On request, and after appropriate arrangements, the data and modelling  
48 employed in this study can be viewed within the secure system firewall.  
49  
50

### 51 **References**

- 52  
53 1. Himmerich H, Hotopf M, Shetty H, Schmidt U, Treasure J, Hayes RD, et al.  
54 Psychiatric comorbidity as a risk factor for the mortality of people with bulimia nervosa. *Soc*  
55 *Psychiatry Psychiatr Epidemiol.* 2019b;54(7):813-21.  
56 2. Himmerich H, Hotopf M, Shetty H, Schmidt U, Treasure J, Hayes RD, et al.  
57 Psychiatric comorbidity as a risk factor for mortality in people with anorexia nervosa.  
58 *European Archives of Psychiatry and Clinical Neuroscience.* 2019a;269(3):351-9.  
59  
60

[Type here]

10

3. Nielsen S. EPIDEMIOLOGY AND MORTALITY OF EATING DISORDERS. *Psychiatric Clinics of North America*. 2001;24(2):201-14.
4. Keshaviah A, Edkins K, Hastings ER, Krishna M, Franko DL, Herzog DB, et al. Re-examining premature mortality in anorexia nervosa: a meta-analysis redux. *Compr Psychiatry*. 2014;55(8):1773-84.
5. Preti A, Rocchi MB, Sisti D, Camboni MV, Miotto P. A comprehensive meta-analysis of the risk of suicide in eating disorders. *Acta Psychiatr Scand*. 2011;124(1):6-17.
6. Crow SJ, Peterson CB, Swanson SA, Raymond NC, Specker S, Eckert ED, et al. Increased mortality in bulimia nervosa and other eating disorders. *Am J Psychiatry*. 2009;166(12):1342-6.
7. Kostro K, Lerman JB, Attia E. The current status of suicide and self-injury in eating disorders: a narrative review. *Journal of Eating Disorders*. 2014;2(1):19.
8. Hamza CA, Stewart SL, Willoughby T. Examining the link between nonsuicidal self-injury and suicidal behavior: a review of the literature and an integrated model. *Clin Psychol Rev*. 2012;32(6):482-95.
9. Brown RC, Plener PL. Non-suicidal Self-Injury in Adolescence. *Curr Psychiatry Rep*. 2017;19(3):20.
10. McCullumsmith C. Laying the groundwork for standardized assessment of suicidal behavior. *J Clin Psychiatry*. 2015;76(10):e1333-5.
11. Gairin I, House A, Owens D. Attendance at the accident and emergency department in the year before suicide: Retrospective study. *British Journal of Psychiatry*. 2003;183(1):28-33.
12. Foster T, Gillespie K, McClelland R. Mental disorders and suicide in Northern Ireland. *Br J Psychiatry*. 1997;170:447-52.
13. Nock MK, Borges G, Bromet EJ, Alonso J, Angermeyer M, Beautrais A, et al. Cross-national prevalence and risk factors for suicidal ideation, plans and attempts. *Br J Psychiatry*. 2008;192(2):98-105.
14. Swanson SA, Crow SJ, Le Grange D, Swendsen J, Merikangas KR. Prevalence and correlates of eating disorders in adolescents. Results from the national comorbidity survey replication adolescent supplement. *Arch Gen Psychiatry*. 2011;68(7):714-23.
15. Claes L, Vandereycken W, Vertommen H. Self-injurious behaviors in eating-disordered patients. *Eat Behav*. 2001;2(3):263-72.
16. Cipriano A, Cella S, Cotrufo P. Nonsuicidal Self-injury: A Systematic Review. *Front Psychol*. 2017;8:1946.
17. Cliffe C, Shetty H, Himmerich H, Schmidt U, Stewart R, Dutta R. Suicide attempts requiring hospitalization in patients with eating disorders: a retrospective cohort study. *International journal of eating disorders*. 2020;ePub(ePub):ePub-ePub.
18. Svirko E, Hawton K. Self-injurious behavior and eating disorders: the extent and nature of the association. *Suicide Life Threat Behav*. 2007;37(4):409-21.
19. Claes L, Fernández-Aranda F, Jimenez-Murcia S, Botella C, Casanueva FF, de la Torre R, et al. Co-occurrence of non-suicidal self-injury and impulsivity in extreme weight conditions. *Personality and Individual Differences*. 2013;54(1):137-40.
20. Cucchi A, Ryan D, Konstantakopoulos G, Stroumpa S, Kaçar A, Renshaw S, et al. Lifetime prevalence of non-suicidal self-injury in patients with eating disorders: a systematic review and meta-analysis. *Psychol Med*. 2016;46(7):1345-58.
21. Forcano L, Álvarez E, Santamaría JJ, Jimenez-Murcia S, Granero R, Penelo E, et al. Suicide attempts in anorexia nervosa subtypes. *Comprehensive Psychiatry*. 2011;52(4):352-8.
22. Forrest LN, Zuromski KL, Dodd DR, Smith AR. Suicidality in adolescents and adults with binge-eating disorder: Results from the national comorbidity survey replication and adolescent supplement. *International Journal of Eating Disorders*. 2017;50(1):40-9.

23. Franko DL, Keel PK, Dorer DJ, Blais MA, Delinsky SS, Eddy KT, et al. What predicts suicide attempts in women with eating disorders? *Psychol Med*. 2004;34(5):843-53.
24. Favaro A, Santonastaso P. Suicidality in eating disorders: clinical and psychological correlates. *Acta Psychiatr Scand*. 1997;95(6):508-14.
25. Franko DL, Keel PK. Suicidality in eating disorders: occurrence, correlates, and clinical implications. *Clin Psychol Rev*. 2006;26(6):769-82.
26. Goldstein A, Gvion Y. Socio-demographic and psychological risk factors for suicidal behavior among individuals with anorexia and bulimia nervosa: A systematic review. *J Affect Disord*. 2019;245:1149-67.
27. Mayes SD, Fernandez-Mendoza J, Baweja R, Calhoun S, Mahr F, Aggarwal R, et al. Correlates of suicide ideation and attempts in children and adolescents with eating disorders. *Eat Disord*. 2014;22(4):352-66.
28. Bulik CM, Thornton L, Pinheiro AP, Plotnicov K, Klump KL, Brandt H, et al. Suicide attempts in anorexia nervosa. *Psychosom Med*. 2008;70(3):378-83.
29. Vieira AI, Machado BC, Machado PPP, Brandão I, Roma-Torres A, Gonçalves S. Putative Risk Factors for Non-Suicidal Self-Injury in Eating Disorders. *Eur Eat Disord Rev*. 2017;25(6):544-50.
30. Barak-Corren Y, Castro VM, Javitt S, Hoffnagle AG, Dai Y, Perlis RH, et al. Predicting Suicidal Behavior From Longitudinal Electronic Health Records. *Am J Psychiatry*. 2017;174(2):154-62.
31. Fernandes AC, Dutta R, Velupillai S, Sanyal J, Stewart R, Chandran D. Identifying Suicide Ideation and Suicidal Attempts in a Psychiatric Clinical Research Database using Natural Language Processing. *Scientific Reports*. 2018;8(1):7426.
32. Spasic I, Nenadic G. Clinical Text Data in Machine Learning: Systematic Review. *JMIR Med Inform*. 2020;8(3):e17984.
33. Haerian K, Salmasian H, Friedman C. Methods for identifying suicide or suicidal ideation in EHRs. *AMIA Annu Symp Proc*. 2012;2012:1244-53.
34. Downs J, Velupillai S, George G, Holden R, Kikoler M, Dean H, et al. Detection of Suicidality in Adolescents with Autism Spectrum Disorders: Developing a Natural Language Processing Approach for Use in Electronic Health Records. *AMIA Annu Symp Proc*. 2017;2017:641-9.
35. Velupillai S, Epstein S, Bittar A, Stephenson T, Dutta R, Downs J. Identifying Suicidal Adolescents from Mental Health Records Using Natural Language Processing. *Stud Health Technol Inform*. 2019;264:413-7.
36. Stewart R, Soremekun M, Perera G, Broadbent M, Callard F, Denis M, et al. The South London and Maudsley NHS Foundation Trust Biomedical Research Centre (SLAM BRC) case register: development and descriptive data. *BMC Psychiatry*. 2009;9(1):51.
37. World Health Organization. (2004). ICD-10 : international statistical classification of diseases and related health problems : tenth revision neWHO.
38. McHugh ML. Interrater reliability: the kappa statistic. *Biochem Med (Zagreb)*. 2012;22(3):276-82.
39. Milos G, Spindler A, Hepp U, Schnyder U. Suicide attempts and suicidal ideation: Links with psychiatric comorbidity in eating disorder subjects. *General Hospital Psychiatry*. 2004;26(2):129-35.
40. Rihmer Z. Can better recognition and treatment of depression reduce suicide rates? A brief review. *European Psychiatry*. 2001;16(7):406-9.
41. Nakar O, Brunner R, Schilling O, Chanen A, Fischer G, Parzer P, et al. Developmental trajectories of self-injurious behavior, suicidal behavior and substance misuse and their association with adolescent borderline personality pathology. *Journal of Affective Disorders*. 2016;197:231-8.

42. Reas DL, Pedersen G, Karterud S, Rø Ø. Self-harm and suicidal behavior in borderline personality disorder with and without bulimia nervosa. *J Consult Clin Psychol.* 2015;83(3):643-8.
43. Muehlenkamp JJ, Takakuni S, Brausch AM, Peyerl N. Behavioral functions underlying NSSI and eating disorder behaviors. *J Clin Psychol.* 2019;75(7):1219-32.
44. Peterson CM, Van Diest AMK, Mara CA, Matthews A. Dialectical behavioral therapy skills group as an adjunct to family-based therapy in adolescents with restrictive eating disorders. *Eat Disord.* 2020;28(1):67-79.
45. Fischer S, Peterson C. Dialectical behavior therapy for adolescent binge eating, purging, suicidal behavior, and non-suicidal self-injury: a pilot study. *Psychotherapy (Chic).* 2015;52(1):78-92.
46. Fichter MM, Quadflieg N, Rief W. Course of multi-impulsive bulimia. *Psychological Medicine.* 1994;24(3):591-604.
47. Lacey JH. Self-damaging and addictive behaviour in bulimia nervosa. A catchment area study. *Br J Psychiatry.* 1993;163:190-4.
48. Fedorowicz VJ, Falissard B, Foulon C, Dardennes R, Divac SM, Guelfi JD, et al. Factors associated with suicidal behaviors in a large French sample of inpatients with eating disorders. *Int J Eat Disord.* 2007;40(7):589-95.
49. Maser JD, Akiskal HS, Schettler P, Scheftner W, Mueller T, Endicott J, et al. Can temperament identify affectively ill patients who engage in lethal or near-lethal suicidal behavior? A 14-year prospective study. *Suicide Life Threat Behav.* 2002;32(1):10-32.
50. Conner KR, Duberstein PR, Conwell Y, Seidlitz L, Caine ED. Psychological vulnerability to completed suicide: a review of empirical studies. *Suicide Life Threat Behav.* 2001;31(4):367-85.
51. Mandelli L, Arminio A, Atti AR, De Ronchi D. Suicide attempts in eating disorder subtypes: a meta-analysis of the literature employing DSM-IV, DSM-5, or ICD-10 diagnostic criteria. *Psychol Med.* 2019;49(8):1237-49.
52. Eddy KT, Dorer DJ, Franko DL, Tahilani K, Thompson-Brenner H, Herzog DB. Diagnostic crossover in anorexia nervosa and bulimia nervosa: implications for DSM-V. *Am J Psychiatry.* 2008;165(2):245-50.
53. Pisetsky EM, Thornton LM, Lichtenstein P, Pedersen NL, Bulik CM. Suicide attempts in women with eating disorders. *J Abnorm Psychol.* 2013;122(4):1042-56.
54. Smith AR, Ortiz SN, Forrest LN, Velkoff EA, Dodd DR. Which Comes First? An Examination of Associations and Shared Risk Factors for Eating Disorders and Suicidality. *Curr Psychiatry Rep.* 2018;20(9):77.
55. Yao S, Kuja-Halkola R, Thornton LM, Runfolo CD, D'Onofrio BM, Almqvist C, et al. Familial Liability for Eating Disorders and Suicide Attempts: Evidence From a Population Registry in Sweden. *JAMA Psychiatry.* 2016;73(3):284-91.
56. Dodd DR, Smith AR, Forrest LN, Witte TK, Bodell L, Bartlett M, et al. Interoceptive Deficits, Nonsuicidal Self-Injury, and Suicide Attempts Among Women with Eating Disorders. *Suicide and Life-Threatening Behavior.* 2018;48(4):438-48.
57. Van Orden KA, Witte TK, Cukrowicz KC, Braithwaite SR, Selby EA, Joiner TE, Jr. The interpersonal theory of suicide. *Psychol Rev.* 2010;117(2):575-600.
58. Forrest LN, Bodell LP, Witte TK, Goodwin N, Bartlett ML, Siegfried N, et al. Associations between eating disorder symptoms and suicidal ideation through thwarted belongingness and perceived burdensomeness among eating disorder patients. *Journal of Affective Disorders.* 2016;195:127-35.

Supplementary File Figure 1

**Figure 1: Workflow for validation of both NLP tools**

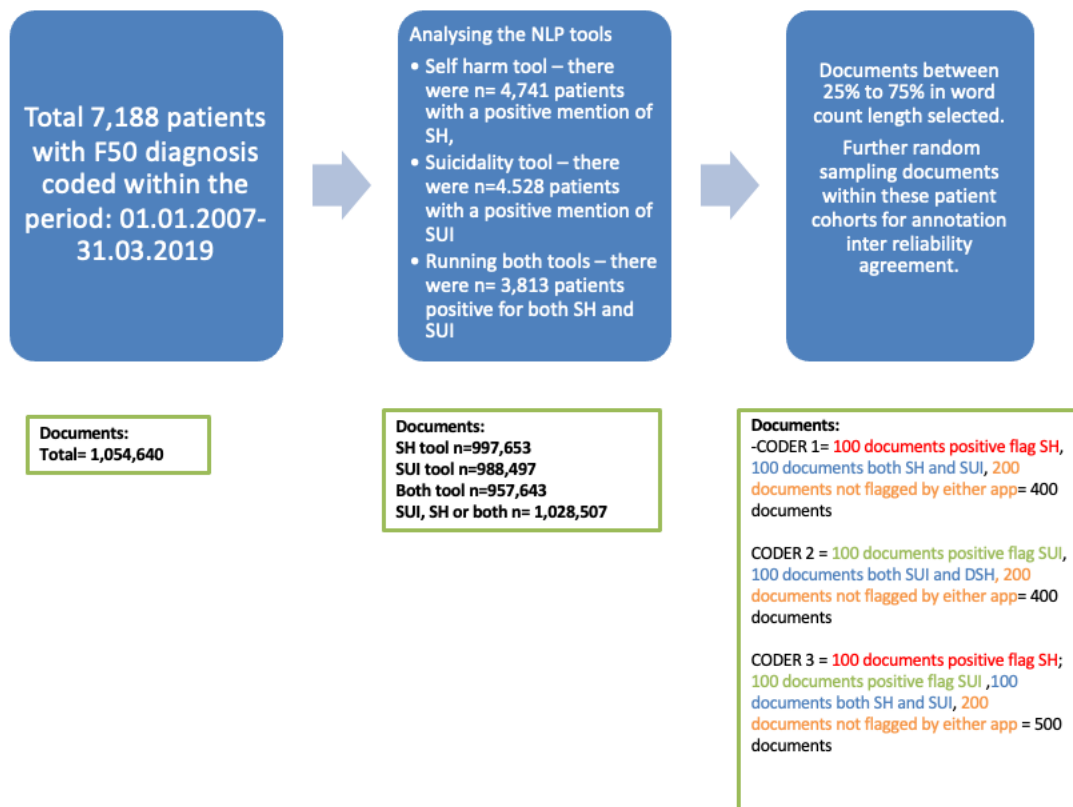

ew only



STROBE Statement—Checklist of items that should be included in reports of *cohort studies*

|                              | Item No | Recommendation                                                                                                                                                                                                                                                                                                         | Page No |
|------------------------------|---------|------------------------------------------------------------------------------------------------------------------------------------------------------------------------------------------------------------------------------------------------------------------------------------------------------------------------|---------|
| <b>Title and abstract</b>    | 1       | (a) Indicate the study's design with a commonly used term in the title or the abstract<br>(b) Provide in the abstract an informative and balanced summary of what was done and what was found                                                                                                                          | 1       |
| <b>Introduction</b>          |         |                                                                                                                                                                                                                                                                                                                        |         |
| Background/rationale         | 2       | Explain the scientific background and rationale for the investigation being reported                                                                                                                                                                                                                                   | 2       |
| Objectives                   | 3       | State specific objectives, including any prespecified hypotheses                                                                                                                                                                                                                                                       | 2       |
| <b>Methods</b>               |         |                                                                                                                                                                                                                                                                                                                        |         |
| Study design                 | 4       | Present key elements of study design early in the paper                                                                                                                                                                                                                                                                | 3       |
| Setting                      | 5       | Describe the setting, locations, and relevant dates, including periods of recruitment, exposure, follow-up, and data collection                                                                                                                                                                                        | 3       |
| Participants                 | 6       | (a) Give the eligibility criteria, and the sources and methods of selection of participants. Describe methods of follow-up<br>(b) For matched studies, give matching criteria and number of exposed and unexposed                                                                                                      | 3       |
| Variables                    | 7       | Clearly define all outcomes, exposures, predictors, potential confounders, and effect modifiers. Give diagnostic criteria, if applicable                                                                                                                                                                               | 3       |
| Data sources/<br>measurement | 8*      | For each variable of interest, give sources of data and details of methods of assessment (measurement). Describe comparability of assessment methods if there is more than one group                                                                                                                                   | 3       |
| Bias                         | 9       | Describe any efforts to address potential sources of bias                                                                                                                                                                                                                                                              | 4       |
| Study size                   | 10      | Explain how the study size was arrived at                                                                                                                                                                                                                                                                              | 4       |
| Quantitative variables       | 11      | Explain how quantitative variables were handled in the analyses. If applicable, describe which groupings were chosen and why                                                                                                                                                                                           | 5       |
| Statistical methods          | 12      | (a) Describe all statistical methods, including those used to control for confounding<br>(b) Describe any methods used to examine subgroups and interactions<br>(c) Explain how missing data were addressed<br>(d) If applicable, explain how loss to follow-up was addressed<br>(e) Describe any sensitivity analyses | 5       |
| <b>Results</b>               |         |                                                                                                                                                                                                                                                                                                                        |         |
| Participants                 | 13*     | (a) Report numbers of individuals at each stage of study—eg numbers potentially eligible, examined for eligibility, confirmed eligible, included in the study, completing follow-up, and analysed<br>(b) Give reasons for non-participation at each stage<br>(c) Consider use of a flow diagram                        | 5-6     |
| Descriptive data             | 14*     | (a) Give characteristics of study participants (eg demographic, clinical, social) and information on exposures and potential confounders<br>(b) Indicate number of participants with missing data for each variable of interest<br>(c) Summarise follow-up time (eg, average and total amount)                         | 5-6     |
| Outcome data                 | 15*     | Report numbers of outcome events or summary measures over time                                                                                                                                                                                                                                                         | 7       |

|    |                          |    |                                                                                                                                                                                                              |     |
|----|--------------------------|----|--------------------------------------------------------------------------------------------------------------------------------------------------------------------------------------------------------------|-----|
| 1  | Main results             | 16 | (a) Give unadjusted estimates and, if applicable, confounder-adjusted estimates and their precision (eg, 95% confidence interval). Make clear which confounders were adjusted for and why they were included | 5-7 |
| 2  |                          |    | (b) Report category boundaries when continuous variables were categorized                                                                                                                                    |     |
| 3  |                          |    | (c) If relevant, consider translating estimates of relative risk into absolute risk for a meaningful time period                                                                                             |     |
| 4  |                          |    |                                                                                                                                                                                                              |     |
| 5  |                          |    |                                                                                                                                                                                                              |     |
| 6  |                          |    |                                                                                                                                                                                                              |     |
| 7  |                          |    |                                                                                                                                                                                                              |     |
| 8  |                          |    |                                                                                                                                                                                                              |     |
| 9  | Other analyses           | 17 | Report other analyses done—eg analyses of subgroups and interactions, and sensitivity analyses                                                                                                               | 5-7 |
| 10 |                          |    |                                                                                                                                                                                                              |     |
| 11 | <b>Discussion</b>        |    |                                                                                                                                                                                                              |     |
| 12 |                          |    |                                                                                                                                                                                                              |     |
| 13 | Key results              | 18 | Summarise key results with reference to study objectives                                                                                                                                                     | 7-8 |
| 14 | Limitations              | 19 | Discuss limitations of the study, taking into account sources of potential bias or imprecision. Discuss both direction and magnitude of any potential bias                                                   | 8   |
| 15 |                          |    |                                                                                                                                                                                                              |     |
| 16 | Interpretation           | 20 | Give a cautious overall interpretation of results considering objectives, limitations, multiplicity of analyses, results from similar studies, and other relevant evidence                                   | 8   |
| 17 |                          |    |                                                                                                                                                                                                              |     |
| 18 |                          |    |                                                                                                                                                                                                              |     |
| 19 | Generalisability         | 21 | Discuss the generalisability (external validity) of the study results                                                                                                                                        | 8   |
| 20 |                          |    |                                                                                                                                                                                                              |     |
| 21 | <b>Other information</b> |    |                                                                                                                                                                                                              |     |
| 22 | Funding                  | 22 | Give the source of funding and the role of the funders for the present study and, if applicable, for the original study on which the present article is based                                                | 9   |
| 23 |                          |    |                                                                                                                                                                                                              |     |
| 24 |                          |    |                                                                                                                                                                                                              |     |

\*Give information separately for exposed and unexposed groups.

**Note:** An Explanation and Elaboration article discusses each checklist item and gives methodological background and published examples of transparent reporting. The STROBE checklist is best used in conjunction with this article (freely available on the Web sites of PLoS Medicine at <http://www.plosmedicine.org/>, Annals of Internal Medicine at <http://www.annals.org/>, and Epidemiology at <http://www.epidem.com/>). Information on the STROBE Initiative is available at <http://www.strobe-statement.org>.

# BMJ Open

## Using natural language processing to extract self-harm and suicidality data from a clinical sample of patients with eating disorders: a retrospective cohort study

|                                 |                                                                                                                                                                                                                                                                                                                                                                                                                                                                                                                                                                                                    |
|---------------------------------|----------------------------------------------------------------------------------------------------------------------------------------------------------------------------------------------------------------------------------------------------------------------------------------------------------------------------------------------------------------------------------------------------------------------------------------------------------------------------------------------------------------------------------------------------------------------------------------------------|
| Journal:                        | <i>BMJ Open</i>                                                                                                                                                                                                                                                                                                                                                                                                                                                                                                                                                                                    |
| Manuscript ID                   | bmjopen-2021-053808.R1                                                                                                                                                                                                                                                                                                                                                                                                                                                                                                                                                                             |
| Article Type:                   | Original research                                                                                                                                                                                                                                                                                                                                                                                                                                                                                                                                                                                  |
| Date Submitted by the Author:   | 24-Aug-2021                                                                                                                                                                                                                                                                                                                                                                                                                                                                                                                                                                                        |
| Complete List of Authors:       | cliffe, charlotte; King's College London, Biomedical research council<br>Seyedsalehi, Aida; Cambridge University<br>Vardavoulia, Katerina; King's College London, Psychology, Psychiatry and Neuroscience<br>Bittar, André<br>Velupillai, Sumithra; Kings College London, Institute of Psychiatry, Psychology and Neuroscience<br>Shetty, Hitesh; South London and Maudsley NHS Foundation Trust, Biomedical Research Centre Nucleus<br>Schmidt, Ulrike; Institute of Psychiatry, KCL, Eating Disorders<br>Dutta, Rina; Kings College London, Institute of Psychiatry, Psychology and Neuroscience |
| <b>Primary Subject Heading</b>: | Mental health                                                                                                                                                                                                                                                                                                                                                                                                                                                                                                                                                                                      |
| Secondary Subject Heading:      | Health informatics                                                                                                                                                                                                                                                                                                                                                                                                                                                                                                                                                                                 |
| Keywords:                       | Eating disorders < PSYCHIATRY, Suicide & self-harm < PSYCHIATRY, BIOTECHNOLOGY & BIOINFORMATICS, EPIDEMIOLOGY                                                                                                                                                                                                                                                                                                                                                                                                                                                                                      |
|                                 |                                                                                                                                                                                                                                                                                                                                                                                                                                                                                                                                                                                                    |

SCHOLARONE™  
Manuscripts

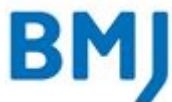

I, the Submitting Author has the right to grant and does grant on behalf of all authors of the Work (as defined in the below author licence), an exclusive licence and/or a non-exclusive licence for contributions from authors who are: i) UK Crown employees; ii) where BMJ has agreed a CC-BY licence shall apply, and/or iii) in accordance with the terms applicable for US Federal Government officers or employees acting as part of their official duties; on a worldwide, perpetual, irrevocable, royalty-free basis to BMJ Publishing Group Ltd ("BMJ") its licensees and where the relevant Journal is co-owned by BMJ to the co-owners of the Journal, to publish the Work in this journal and any other BMJ products and to exploit all rights, as set out in our [licence](#).

The Submitting Author accepts and understands that any supply made under these terms is made by BMJ to the Submitting Author unless you are acting as an employee on behalf of your employer or a postgraduate student of an affiliated institution which is paying any applicable article publishing charge ("APC") for Open Access articles. Where the Submitting Author wishes to make the Work available on an Open Access basis (and intends to pay the relevant APC), the terms of reuse of such Open Access shall be governed by a Creative Commons licence – details of these licences and which [Creative Commons](#) licence will apply to this Work are set out in our licence referred to above.

Other than as permitted in any relevant BMJ Author's Self Archiving Policies, I confirm this Work has not been accepted for publication elsewhere, is not being considered for publication elsewhere and does not duplicate material already published. I confirm all authors consent to publication of this Work and authorise the granting of this licence.

1  
2  
3 1  
4  
5 2  
6  
7  
8  
9 **Using natural language processing to extract self-harm and**  
10 **suicidality data from a clinical sample of patients with eating**  
11 **disorders: a retrospective cohort study**  
12  
13  
14  
15  
16  
17  
18

19 Charlotte Cliffe<sup>1</sup>, Aida Seyedsalehi<sup>1</sup>; Katerina Vardavoulia<sup>1</sup>, Andre Bittar<sup>1</sup>, Sumithra  
20 Velupillai<sup>1</sup>, Hitesh Shetty<sup>1</sup>, Ulrike Schmidt<sup>1</sup>, Rina Dutta<sup>1</sup>  
21  
22  
23  
24  
25  
26  
27  
28  
29  
30  
31  
32  
33  
34  
35  
36  
37  
38  
39  
40  
41  
42  
43  
44  
45  
46  
47  
48  
49

50  
51  
52  
53  
54  
55  
56  
57  
58  
59  
60  
*Corresponding author: Charlotte Cliffe, charlotte.cliffe@kcl.ac.uk; 07795341866; post to:  
BRC Nucleus; Kings College London; Denmark Hill; no fax number*

**Key words:** self-harm, suicidality, eating disorders, electronic health records, natural  
language processing

**Word count:** 3827

1  
2  
3  
4 3 Using natural language processing to extract self-harm and suicidality data from a  
5 4 clinical sample of patients with eating disorders: a retrospective cohort study  
6  
7 5  
8

9 6 Charlotte Cliffe, Aida Seyedsalehi, Katerina Vardavoulia, Andre Bittar, Sumithra Velupillai,  
10  
11 7 Ulrike Schmidt, Rina Dutta

12 8 **Abstract**  
13  
14 9

15  
16 10 **Objectives:** The objective of this study was to determine risk factors for those diagnosed with  
17 11 eating disorders who report self-harm and suicidality.

18  
19 12 **Design & Setting:** This study was a retrospective cohort study within a secondary mental  
20 13 health service, South London & Maudsley NHS Trust. **Participants:** All diagnosed with an  
21 14 F50 diagnosis of eating disorder from 01/2009-09/2019 were included. **Intervention and**  
22 15 **measures:** Electronic health records (EHRs) for these patients were extracted and two natural  
23 16 language processing tools were used to determine documentation of self-harm and suicidality  
24 17 in their clinical notes. These tools were validated manually for attribute agreement scores  
25 18 within this study.

26 19 **Results:** The attribute agreements for precision of positive mentions of self-harm were 0.96  
27 20 and for suicidality were 0.80; this demonstrates a 'strong' and 'near perfect' agreement and  
28 21 highlights the reliability of the tools in identifying the EHRs reporting self-harm or  
29 22 suicidality. There were 7434 patients with EHRs available and diagnosed with eating  
30 23 disorders included in the study from the dates 01/2007 to 09/2019. Of these, 4591(61.8%)  
31 24 had a mention of self-harm within their records and 4764 (64.0%) had a mention of  
32 25 suicidality; 3899 (52.4%) had mentions of both. Patients reporting either self-harm or  
33 26 suicidality were more likely to have a diagnosis of anorexia nervosa (self-harm, AN  
34 27 OR=3.44, 95% CI 1.05-11.3, p=0.04; suicidality, AN OR=8.20, 95% CI 2.17-30.1; p=0.002).  
35 28 They were also more likely to have a diagnosis of borderline personality disorder (p<0.001),  
36 29 bipolar disorder (p<0.001) or substance misuse disorder (p<0.001).

37  
38 30 **Conclusion:** A high percentage of patients (>60%) diagnosed with eating disorders report  
39 31 either self-harm or suicidal thoughts. Relative to other eating disorders, those diagnosed with  
40 32 anorexia nervosa were more likely to report either self-harm or suicidal thoughts. Psychiatric  
41 33 comorbidity, in particular borderline personality disorder and substance misuse were also  
42 34 associated with an increase risk in self-harm and suicidality. Therefore, risk assessment  
43 35 amongst patients diagnosed with eating disorders is crucial.  
44  
45  
46  
47  
48  
49  
50  
51  
52  
53  
54  
55  
56  
57  
58  
59  
60

[Type here]

## Article Summary: Strengths and Limitations of this study

1. The size of the cohort is over 7400 patients
2. Long period of follow up (12.5 years)
3. Limited number of study designs (most cross sectional) reporting on suicidal behaviour amongst those with EDs
4. The tools used to detect self-harm and suicidality are not able to consider the temporality in relation to the ED diagnosis; therefore, the suicidal behaviour could have been detected prior to diagnosis
5. The clinical records are routine clinical data not primarily collected for research therefore rely on clinician documentation.

Word count: 3827

## Introduction

Patients diagnosed with eating disorders (EDs), including anorexia nervosa (AN), bulimia nervosa (BN) and eating disorder not otherwise specified (EDNOS)<sup>1</sup> are at a greater risk of mortality compared to the general population (1, 2). A major contribution to this increased mortality rate is the higher risk of completed suicide in patients with EDs (3). Individuals with a lifetime diagnosis of AN and BN are 18 and 7 times more likely to die from suicide compared to age-matched general population controls, respectively (4, 5). Those with a diagnosis of EDNOS are 4 times more likely to complete suicide (6). Therefore, given the elevated risk of suicide amongst patients diagnosed with EDs, it is of utmost importance that factors associated with this risk are determined (7).

Self-harm and suicidal ideation are both strong predictors of subsequent suicide (8). Self-harm can be defined as 'self-injurious behaviour characterised by deliberate harm to the body in the absence of an intent to die'(9) and suicidal ideation can be defined as 'thoughts about killing oneself, which may or may not include a plan'(10). It has been determined that a common antecedent for completed suicide in the general population, is previous self harm, with up to 60% of people who complete suicide having previously self-harmed, the majority

---

<sup>1</sup> The DSM-V now refers to 'Otherwise specified feeding or eating disorder' (OFSED); but the studies and data included in this paper used the DSM-IV equivalent term of EDNOS.

[Type here]

1  
2  
3  
4 70 within one year prior to the attempt (11, 12). Lifetime suicidal ideation is also associated with  
5 71 attempted suicide (up to 30%); those with a plan have an increased risk of completed suicide  
6 72 (up to 55%) and the majority of attempts occur within the first year of the onset of suicidal  
7 73 ideation (13). Therefore, identifying patients who report either lifetime suicidal ideation and  
8  
9 74 self-harm is an important clinical marker for those at risk of later suicide.

10  
11  
12 75 Previous studies have demonstrated the association between suicidality, self-harm and  
13 76 EDs (14-17). Our previous study focusing on suicide attempts, demonstrated the cumulative  
14  
15 77 10-year incidence of suicide attempts in a population of patients with EDs as 6.8% (17).  
16  
17 78 Rates of self-harm have been reported as high as 42% for AN, up to 55% for bulimia nervosa  
18  
19 79 BN (18) and 26% for EDNOS (19). A recent meta-analysis summarised that 22% of patients  
20  
21 80 with AN and 33% of patients with BN reported lifetime self-harm (20).

22 81 Studies have reported mixed findings in terms of suicide attempts across ED  
23  
24 82 diagnostic categories (21-24), with many showing no difference in suicide attempts between  
25  
26 83 ED subtypes, some demonstrated higher rates of suicide attempts and self-harm in AN  
27  
28 84 compared to BN (17, 23, 25, 26) and others reported more frequent suicide attempts and  
29  
30 85 ideation in BN compared to AN (24, 27). Furthermore, binge eating disorder (BED), a  
31  
32 86 relatively new diagnostic category, has also been associated with increased suicidality (22).  
33  
34 87 In other studies, it appears that binge eating and purging are particularly associated with  
35  
36 88 increased risks of attempted suicide, due to their association with impulsivity (26, 28). Some  
37  
38 89 of these heterogenous findings have been attributed to differences in patient settings  
39  
40 90 (outpatient or inpatient) (21), diagnostic subtyping (e.g. restricting vs binge-purging AN) (28)  
41  
42 91 or the methods used for determining suicide attempts (26).

43  
44 92 Some studies have focused on risk factors for developing suicidal behaviour amongst  
45  
46 93 those with EDs. A number of risk factors have been identified, such as younger age of ED  
47  
48 94 onset, specific personality traits, comorbid disorders, negative life events and substance  
49  
50 95 misuse (17, 26, 29). However, there are limitations with a number of past studies in terms of  
51  
52 96 low numbers of suicidal behaviour within the study population, resulting in low power (5).  
53  
54 97 One possibility to improve this problem is to use longitudinal psychiatric case records, such  
55  
56 98 as electronic health records (EHRs). This captures a large enough population manifesting  
57  
58 99 suicidal behaviour, to ensure sufficient power (30).

59 100 The increasing use of EHRs in hospital care systems, alongside the growth of health  
60  
61 101 informatics allows us to develop computational tools that can analyse these large clinical  
62  
63 102 datasets (31). Natural language processing (NLP) tools allow us to determine information  
64  
65 103 about symptomatology from information written in free-text EHRs (32). Previous research

[Type here]



1  
2  
3  
4 104 has shown that using NLP applications increases the positive predictive value of detecting  
5 105 patient-level suicidality (33). This is of particular use for suicidal behaviour, as both positive  
6  
7 106 and negated mentions of suicidality and self-harm are routinely reported within free text  
8  
9 107 during psychiatric assessments and follow-up (31, 34, 35).

10  
11 108 The aim of this study was to evaluate two NLP tools, one that identifies mentions of  
12 109 self-harm (36), and the other that identifies suicidality (35) for a cohort of ED patients. To  
13  
14 110 achieve this, we compared the performance of the NLP tools against a gold-standard set of  
15 111 manually annotated documents, using previously defined coding rules. We then used the tools  
16  
17 112 to identify positive mentions of either self-harm or suicidality on a patient level, to evaluate  
18  
19 113 the incidence of self-harm and suicidality in patients diagnosed with eating disorders over a  
20  
21 114 12-year period.

22 115

## 23 116 **Methods**

24 117

### 25 118 **Study Design and Setting**

26  
27  
28 119 This study is a retrospective cohort study using data obtained from South London and  
29 120 Maudsley National Health Service Foundation trust (SLaM). This is a mental health service  
30  
31 121 serving an estimated population of 2 million residents of southeast London. Patients come  
32  
33 122 from the London boroughs of Croydon, Southwark, Lambeth, Lewisham, Bromley, Bexley  
34  
35 123 and Greenwich. SLaM has had fully electronic records since 2006 and the National Institute  
36  
37 124 for Health Research funded Biomedical Research Centre supports the infrastructure for  
38  
39 125 rendering its anonymised records available for research. We analysed the data as ‘event  
40  
41 126 notes’ in the electronic health records (EHRs), irrespective whether they were created during  
42  
43 127 an inpatient stay, during follow-up or a telephone appointment.

44 128

### 45 129 **Patient and public involvement**

46 130 No patient involved.

47 131

### 48 132 **Inclusion criteria and exposures**

49  
50  
51 133 The analysed cohort was extracted via the Clinical Record Interactive Search (CRIS)  
52 134 system (37) and comprised of individuals who received an International Classification of  
53  
54 135 Diseases, 10<sup>th</sup> Revision (ICD-10) (38) diagnosis of an ED (F50.0-F50.9) within the 12-year  
55  
56 136 observation period of 1 January 2007 to 31 September 2019. These patients were identified  
57  
58 137 using two data sources available within the EHRs. First, structured information on diagnosis  
59  
60

[Type here]

1  
2  
3  
4 138 from drop down fields in the source record. Second, structured variables which are routinely  
5 139 extracted from open text fields using a bespoke algorithm generated by the Generalised  
6  
7 140 Architecture for Text Engineering (GATE) software (39). The comorbidity exposures of  
8  
9 141 interest were diagnoses of substance misuse (F10-F19), bipolar disorder (F31), anxiety  
10  
11 142 disorders, depression (F32 and F33) and personality disorder (F60) determined by structured  
12  
13 143 information on the EHRs in the drop-down fields in the source record.  
14  
15 144  
16 145

### 17 146 **Primary outcomes**

18  
19 147 The outcomes of interest were a patient reporting at least one positive mention of self-  
20  
21 148 harm or one positive mention of suicidality. Information on these outcomes was extracted  
22  
23 149 using NLP applications that have been previously developed and used within similar datasets  
24  
25 150 (31, 34, 35). The first application used rule-based linguistic processing to identify positive  
26  
27 151 mentions of self-harm (SH) in clinical texts, this included historic and current episodes, but  
28  
29 152 did not include self-harm ideation. The second application, also rule-based and using lexical  
30  
31 153 resource, included suicidal ideation (SUI) of both a passive and active nature; both of these  
32  
33 154 were recorded as a binary outcome. A detailed description of the development of both NLP  
34  
35 155 tools used to identify mentions of self-harm and suicidality are described in previous studies  
36  
37 156 (35, 36).  
38  
39 157  
40 158  
41 159

### 40 160 **Workflow for validating the NLP tools**

41 161 **Figure 1** shows the workflow for validating the NLP tools to determine the primary  
42  
43 162 outcomes. All F50 diagnoses between 1<sup>st</sup> Jan 2007 and 31<sup>st</sup> March 2019 were included in the  
44  
45 163 validation; this period of time was 6 months shorter than the final analysis due to the lag time  
46  
47 164 between the validation and final statistical analysis. In total, 7,188 patients met the inclusion  
48  
49 165 criteria, of which 6,972 had at least one EHR document available. Overall, **1,054,640**  
50  
51 166 documents were available for these patients. For all 6,972 patients, the NLP tools were used  
52  
53 167 to search for mentions of both suicidality and self-harm. In total, 5,456 patients had positive  
54  
55 168 mentions of either SH or SUI, 4741 had any mention of SH, 4528 had any mention of SUI,  
56  
57 169 and 3813 patients had both SH and SUI mentioned. Manual annotations were compared to  
58  
59 170 the NLP tool annotations and attribute agreements were calculated (40).

58 171 From these patients, a sample of documents was randomly extracted. This was  
59  
60 172 achieved by firstly restricting the patients to those who had a number of EHR documents

[Type here]

1  
2  
3  
4 173 within the 1<sup>st</sup> and 3<sup>rd</sup> quartiles, to eliminate outliers with very few documents or with  
5 174 excessive documentation. This resulted in 2923 patients in total with positive mentions of  
6  
7 175 either SH or SUI (135,317 documents), 2431 patients with a positive mention of SH (114,962  
8  
9 176 documents), 2294 patients with a positive mention of SUI (110,399 documents), and 1802  
10 177 patients with a positive mention of both SH and SUI (90,044 documents). Each patient had a  
11  
12 178 minimum of 17 documents and maximum of 99 documents.

13  
14 179 A randomised sample of 500 documents was taken for manual review: 100 with a  
15 180 positive mention of suicidality only, 100 with a positive mention of self-harm only, 100 with  
16 181 a mention of both self-harm and suicidality and 200 with no mention of either. Three manual  
17 182 coders, including one clinically trained psychiatrist (CC, AS, AV), were assigned either  
18  
19 183 suicidality (AS, 400 documents), self-harm (AV, 400 documents) or both (CC, 500  
20 184 documents) for review. The sets were independently classified with 300 of them crossing  
21  
22 185 over and classified by all three authors.

23  
24  
25 186 For the suicidality documents, two coders (CC and AS) independently labelled each  
26 187 document as suicidal, non-suicidal or uncertain. Inter-rater agreement was measured using  
27 188 Cohen's Kappa and the F1 statistic on a document level to determine interrater reliability  
28  
29 189 (40). Any discrepancies were discussed and clarified to develop a 'gold standard' set of  
30 190 documents. The same principle was applied to mentions of self-harm within the documents,  
31  
32 191 determined by two coders (CC, AV). Any mention of self-harm within the document was  
33  
34 192 coded as positive, negative and whether relevant or non-relevant, for example a positive code  
35 193 refers to the note referring to an act of self-harm by the individual, negative refers to a denial  
36  
37 194 or negated act of self-harm. If the mention was about a friend or family member that was not  
38  
39 195 relevant to the patient non-relevant was coded. (see Figure 1).  
40  
41  
42 196

### 43 197 **Testing the Algorithms**

44  
45 198 The performance of each NLP tool was tested by comparing the output of the  
46 199 application against the 'gold standard' set of manual annotations and calculating precision  
47 200 (positive predictive value; PPV) and recall (sensitivity) statistics. Good inter-rater agreement  
48  
49 201 between the NLP output and gold-standard was indicated by a Cohen's kappa of 0.80 for  
50 202 identifying both suicidality and self-harm. Scores > 0.80 demonstrate a 'strong' level of  
51  
52 203 agreement and reliable data, scores > 0.90 are 'almost perfect' agreement and scores > 0.60  
53  
54 204 were considered 'moderate' in agreement (40).  
55  
56 205  
57  
58  
59 206  
60

[Type here]

## 207 **Figure 1: Workflow for validation of both NLP tools**

208

209

210

### 211 **Covariates**

212 The year and month of birth, gender, ethnicity, deprivation score and marital status  
213 were retrieved from the CRIS database. Age in years was calculated from the individual's  
214 first eating disorder diagnosis in the observation window or from January 2007 if the  
215 diagnosis preceded the observation period. The deprivation score was grouped into tertiles  
216 (33<sup>rd</sup> percentiles) and converted into a categorical variable. Previous studies have used this  
217 method of categorical definition using the same data source (2).

218

### 219 **Statistical analysis**

220 Analysis was completed using Stata software. All patients were eligible for analysis.  
221 Descriptive statistics were used to characterise the patients. Logistic regression was used to  
222 calculate odd ratios with 95% confidence intervals with self-harm or suicidality as the  
223 'outcome' and the comorbid psychiatric diagnoses as exposure. ED diagnoses were  
224 categorised into AN (both restricting and purging types), BN, and all other F50 diagnoses.  
225 For those with multiple diagnoses, a diagnostic hierarchy of AN>BN>other was used. The  
226 observation period started from the first date of diagnosis or 1 Jan 2007 if the diagnosis was  
227 made prior to this date and the ended on the 31 September 2019. Univariate logistic  
228 regression was used to estimate the effect of the primary ED diagnosis, demographic  
229 characteristics and psychiatric comorbidities on each of the outcomes of interest (SH and  
230 SUI). Next, multivariable analyses were performed to calculate the adjusted odds ratio (OR)  
231 and 95% confidence interval (CI) for each comorbid psychiatric diagnosis, whilst controlling  
232 for demographics and the ED diagnosis. the effect of the psychiatric comorbidities and  
233 demographics.

234

### 235 **Ethical Approval**

236 The CRIS database has received ethical approval for secondary analysis: Oxford REC  
237 C, reference 18/SC/0372.

238

239

240

241

### 242 **Results**

[Type here]

243

244 **Descriptive Statistics**

245 Table 1 summarises the different types of ED diagnosis by age. The mean age was

246 26.0 (SD 11; range 10-90)

247

248 **Table 1: Summary of all diagnoses by age group** (11 patients had no detailed information  
249 about the diagnosis other than 'F50')

250

| Age group<br>Years ,<br>(n)% total                               | AN              | BN                 | EDNOS           |
|------------------------------------------------------------------|-----------------|--------------------|-----------------|
| <10 (39) <1%                                                     | 4 (<1%)         | 0                  | 35 (1.1%)       |
| <b>10-19 (2572)<br/>34.6%</b>                                    | 1250<br>(49.0%) | 320<br>(20.4<br>%) | 1002<br>(30.4%) |
| <b>20-29 (2720)<br/>36.6%</b>                                    | 807<br>(31.6%)  | 714<br>(45.4<br>%) | 1199<br>(36.4%) |
| <b>30-39 (1233)<br/>16.6%</b>                                    | 276<br>(10.8%)  | 354<br>(22.5<br>%) | 603<br>(18.3%)  |
| <b>40-49 (527)<br/>7.10%</b>                                     | 118<br>(4.62%)  | 122<br>(7.76<br>%) | 287<br>(8.70%)  |
| <b>50+ (332)<br/>4.47%</b>                                       | 98<br>(3.84%)   | 62<br>(3.94<br>%)  | 172<br>(5.22%)  |
| <b>TOTAL<br/>n= 7423 (11<br/>missing detailed<br/>diagnosis)</b> | <b>2553</b>     | <b>1572</b>        | <b>3298</b>     |

251

252

253

254

255

256

257

257 **Self-harm and Suicidality amongst patients**

258 The attribute agreements for the final corpus of documents on self-harm and

259 suicidality are displayed below in Table 2. The three attributes include 'positive' ie there is a

260 mention of either self-harm or suicidality, 'negative or non' ie there is a denial of self-harm

261 or suicidality and 'relevant' i.e. the mention is relevant to the patient and not a family

[Type here]

262 member of friend. A summary of those reporting self-harm or suicidality by age are displayed  
263 in Table 3.

264

265

266

267 **Table 2 ; Attribute agreements:** attribute agreements reflect the comparison of the NLP tool

268 output to the gold standard set of manually annotated documents. Annotations are document-

269 level for suicidality and mention-level for self-harm.

270

|                                | Positive document for suicidality | Non-relevant document for suicidality | Non-suicidal documents | Positive mention of self-harm | Relevant mention of self-harm | Negative mention of self-harm |
|--------------------------------|-----------------------------------|---------------------------------------|------------------------|-------------------------------|-------------------------------|-------------------------------|
| Precision                      | 0.80                              | 0.98                                  | 0.58                   | 0.96                          | 0.89                          | 0.59                          |
| Recall                         | 0.82                              | 0.92                                  | 0.87                   | 0.91                          | 0.72                          | 0.79                          |
| F1-score                       | 0.81                              | 0.95                                  | 0.70                   | 0.94                          | 0.80                          | 0.68                          |
| Number of documents / mentions | 114                               | 106                                   | 55                     | 528                           | 385                           | 86                            |

271

272

273 **Table 3: Self harm and suicidality reported amongst patients by age**

274

| Age group, years | Self- harm present during follow up period, n (%l) | Suicidality present, n (%) |
|------------------|----------------------------------------------------|----------------------------|
| <10              | 16 (<1%)                                           | 15 (<1%)                   |
| 10-19            | 1914 (41.7%)                                       | 1928 (40.5%)               |
| 20-29            | 1489 (32.4%)                                       | 1553 (32.6%)               |

[Type here]

|              |             |             |
|--------------|-------------|-------------|
| <b>30-39</b> | 675 (14.7%) | 722 (15.2%) |
| <b>40-49</b> | 310 (6.75%) | 168 (6.75%) |
| <b>50+</b>   | 187 (4.1%)  | 134 (5.38%) |
| <b>TOTAL</b> | <b>4591</b> | <b>4520</b> |

275

276

277

### 278 Self-harm-reported amongst patients with eating disorders

279

280 Patients who reported self-harm (past or present) were more likely to be younger in age (OR  
 281 = 0.98, 95% CI 0.97-0.98; P<0.001), less likely to be female (OR = 0.67, 95% CI 0.58-0.79;  
 282 P<0.001) more likely to be of white ethnicity (OR = 1.40, 95% CI 1.10-1.78; p=0.006), and  
 283 more likely to have a diagnosis of AN (OR = 3.44, 95% CI 1.05-11.3; p=0.04). They were  
 284 also more likely to have a comorbid diagnosis; in particular a diagnosis of borderline  
 285 personality disorder (BPD; OR = 54.2, 95% CI 24.2-121.4; p<0.001), bipolar disorder (OR =  
 286 9.57, 95% CI 5.57-15.4; p<0.001) and substance misuse (OR =7.22 , 95% CI 2.94- 18.3;  
 287 p<0.001); as displayed in Table 4.

288

289 **Table 4: Univariable logistic regression to determine the effect of demographics,  
 290 primary ED diagnosis, and psychiatric comorbidities on risk of self-harm**

291

292

| Variables               | Number (%)<br>Age=Mean<br>+/- SD | Self harm<br>n (% of<br>group) | Unadjusted Odds Ratio | P value |
|-------------------------|----------------------------------|--------------------------------|-----------------------|---------|
| <b>Age (years)</b>      | 26.0 (11.0)                      | 4591                           | 0.98 (0.97-0.98)      | <0.001  |
| <b>Gender</b>           | 6635                             | 4252                           | ref                   |         |
| Female                  | (91.5%)                          | (58.6%)                        |                       |         |
| Male                    | 613 (8.5%)                       | 334 (4.6%)                     | 0.67 (0.58-0.79)      | <0.001  |
| <b>Marital Status</b>   |                                  |                                |                       |         |
| Single                  | 5081<br>(70.1%)                  | 3,341<br>(46.0%)               | ref                   |         |
| Married/partner         | 724 (9.98%)                      | 429<br>(5.91%)                 | 0.76 (0.65 -0.89)     | P=0.001 |
| Separate/divorced/widow | 200 (2.76%)                      | 122<br>(1.68%)                 | 0.81 (0.61-1.1)       | P=0.17  |
| Not known               | 1248<br>(17.7%)                  | 699<br>(9.64%)                 | n/a                   | n/a     |
| <b>Ethnicity</b>        |                                  |                                |                       |         |

[Type here]

|                                        |                  |                 |                   |        |
|----------------------------------------|------------------|-----------------|-------------------|--------|
| White                                  | 6,008<br>(84.5%) | 3752<br>(53.8%) | 1.40 (1.10-1.78)  | 0.006  |
| Black                                  | 344 (4.84%)      | 239<br>(3.50%)  | 1.26 (0.94-1.68)  | 0.12   |
| South Asian                            | 219 (3.1%)       | 149<br>(2.17%)  | 1.06 (0.86-1.30)  | 0.59   |
| Mixed and other                        | 428 (6.0%)       | 273<br>(3.97%)  | 0.81 (0.53-1.25)  | 0.34   |
| Unknown                                | 115 (1.6%)       | 51 (<1%)        | n/a               | n/a    |
| <b>Deprivation Score</b>               |                  |                 |                   |        |
| Group 1                                | 2001<br>(26.9%)  | 1240<br>(27.0%) | ref               |        |
| Group 2                                | 2897<br>(39.0%)  | 1778<br>(38.7%) | 0.88 (0.83-1.11)  | 0.83   |
| Group 3                                | 2514<br>(33.8%)  | 1559<br>(34.0%) | 1.00 (0.88-1.13)  | 0.99   |
| Not known                              | 22 (<1%)         | 14 (<1%)        | 1.34 (0.52-3.51)  | 0.54   |
| <b>Primary ED diagnosis</b>            |                  |                 |                   |        |
| AN                                     | 2553<br>(34.4%)  | 1876<br>(40.9%) | 3.44 (1.05-11.3)  | 0.04   |
| BN                                     | 1572<br>(21.2%)  | 973<br>(21.2%)  | 2.28 (0.69-7.52)  | 0.17   |
| EDNOS                                  | 3298<br>(44.4%)  | 1737<br>(37.8%) | 1.40 (0.43-4.59)  | 0.55   |
| Unknown/other?                         | 181 (2%)         | 5 (<1%)         | n/a               | n/a    |
| <b>All substance misuse</b>            |                  |                 |                   |        |
| None                                   | 2644<br>(99.3%)  | 4398<br>(95.8%) | ref               |        |
| Alcohol                                | 13 (<1%)         | 132<br>(2.89%)  | 6.10 (3.44-10.8)  | <0.001 |
| Substance misuse                       | 5 (<1%)          | 61 (1.33%)      | 7.22 (2.94- 18.3) | <0.001 |
| <b>Depression</b>                      |                  |                 |                   |        |
| No                                     | 2532<br>(95.1%)  | 3777<br>(82.3%) | ref               |        |
| Yes                                    | 130 (4.89%)      | 814<br>(17.7%)  | 4.20 (3.46-5.01)  | <0.001 |
| <b>Anxiety disorders</b>               |                  |                 |                   |        |
| No                                     | 2642<br>(99.3%)  | 4503<br>(98.1%) | ref               |        |
| Yes                                    | 20 (<1%)         | 88 (1.92%)      | 2.58 (1.58-4.21)  | <0.001 |
| <b>Borderline Personality Disorder</b> |                  |                 |                   |        |
| No                                     | 2656<br>(99.8%)  | 4090<br>(89.1%) | ref               |        |
| Yes                                    | 6 (<1%)          | 501<br>(10.9%)  | 54.2 (24.2-121.4) | <0.001 |
| <b>Other Personality Disorder</b>      |                  |                 |                   |        |

[Type here]



|                         |                 |                 |                  |        |
|-------------------------|-----------------|-----------------|------------------|--------|
| No                      | 2649<br>(99.5%) | 3939<br>(85.8%) | ref              |        |
| Yes                     | 13 (<1%)        | 652<br>(14.2%)  | 33.7 (19.4-58.5) | <0.001 |
| <b>Bipolar Disorder</b> |                 |                 |                  |        |
| No                      | 2648<br>(99.5%) | 4370<br>(95.2%) | ref              |        |
| Yes                     | 14 (<1%)        | 221<br>(4.81%)  | 9.57 (5.57-15.4) | <0.001 |

293

294 **Suicidality reported amongst patients with eating disorders**

295

296 Patients who reported suicidality were more likely to be younger (OR = 0.98, 95% CI 0.97-  
 297 0.99; p<0.001), of white ethnicity (OR=1.59, 95% CI 1.23-2.10; p<0.001), less likely to be  
 298 married or with a partner (OR=0.76, 95% CI 0.65-0.90; p=0.001 and have a diagnosis of AN  
 299 (OR=8.20, 95% CI 2.17-30.1; p=0.002). They were also more likely to have a comorbid  
 300 diagnosis, in particular BPD (OR = 26.2, 14.4-47.7; p<0.001), bipolar disorder (OR = 9.31,  
 301 95% CI 5.31-16.3; P<0.001) and alcohol misuse (OR = 6.59, 95% CI 3.56-12.2; p<0.001), as  
 302 seen in Table 5.

303

304 **Table 5: Univariable logistic regression to determine the effect of demographics,**  
 305 **primary ED diagnosis, and psychiatric comorbidities on risk of suicidality**

306

| Variables                | Number (%)<br>Age=Mean<br>+/- SD | Suicidality n<br>(% of<br>group) | Unadjusted Odds Ratio | P value |
|--------------------------|----------------------------------|----------------------------------|-----------------------|---------|
| <b>Age (years)</b>       | 26.1 (11.0)                      |                                  | 0.98 (0.97-0.99)      | <0.001  |
| <b>Gender %</b>          | 6635                             | 4364 (65.8%)                     | ref                   |         |
| Female                   | (91.5%)                          |                                  |                       |         |
| Male                     | 613 (8.5%)                       | 395 (64.4%)                      | 0.94 (0.79-1.12)      |         |
| <b>Marital Status</b>    |                                  |                                  |                       |         |
| Single                   | 5081<br>(70.1%)                  | 3476 (72.3%)                     | ref                   |         |
| Married/partner          | 724 (9.98%)                      | 451 (9.47%)                      | 0.76 (0.65 -0.90)     | P=0.001 |
| Separate/divorced/widow  | 200 (2.76%)                      | 131 (2.75%)                      | 0.88 (0.65-1.18)      | P=0.39  |
| Not known                | 1248<br>(17.7%)                  | 706 (14.8%)                      | n/a                   | n/a     |
| <b>Ethnicity</b>         |                                  |                                  |                       |         |
| White                    | 6,008<br>(84.5%)                 | 3907 (84.3%)                     | 1.59 (1.23-2.10)      | <0.001  |
| Black                    | 344 (4.84%)                      | 255 (5.5%)                       | 1.03 (0.77-1.37)      | 0.84    |
| South Asian              | 219 (3.1%)                       | 145 (3.13%)                      | 0.97 (0.79-1.20)      | 0.80    |
| Mixed and other          | 428 (6.0%)                       | 276 (5.95%)                      | 0.76 (0.49-1.17)      | 0.21    |
| Unknown                  | 115 (1.6%)                       | 52 (1.12%)                       | n/a                   | n/a     |
| <b>Deprivation Score</b> |                                  |                                  |                       |         |

[Type here]

|                                        |                 |              |                   |        |
|----------------------------------------|-----------------|--------------|-------------------|--------|
| Group 1                                | 2001<br>(26.9%) | 1300 (27.3%) | ref               |        |
| Group 2                                | 2897<br>(39.0%) | 1829 (38.9%) | 0.93 (0.83-1.06)  | 0.27   |
| Group 3                                | 2514<br>(33.8%) | 1623 (34.1%) | 0.98 (0.86-1.11)  | 0.75   |
| Not known                              | 22 (<1%)        | 12 (<1%)     | 0.76 (0.31-1.87)  | 0.54   |
| <b>Presence of eating Disorder</b>     |                 |              |                   |        |
| AN                                     | 2553<br>(34.4%) | 1909 (75.5%) | 8.20 (2.17-30.1)  | 0.002  |
| BN                                     | 1572<br>(21.2%) | 1005 (67.7%) | 4.49 (1.48-21.2)  | 0.01   |
| EDNOS                                  | 3298<br>(44.4%) | 1847 (57.2%) | 3.57 (0.94-13.47) | 0.06   |
| unknown                                | 11 (<1%)        | 3 (<1%)      | n/a               | n/a    |
| <b>All substance misuse</b>            |                 |              |                   |        |
| None                                   | 2472<br>(99.3%) | 4570 (95.9%) | ref               |        |
| Alcohol                                | 11 (<1%)        | 134 (2.81%)  | 6.59 (3.56-12.2)  | <0.001 |
| Substance misuse                       | 6 (<1%)         | 60 (1.26%)   | 5.41 (2.33-12.5)  | <0.001 |
| <b>Depression</b>                      |                 |              |                   |        |
| No                                     | 2383<br>(95.7%) | 3926 (82.4%) | ref               |        |
| Yes                                    | 106 (4.26%)     | 838 (17.6%)  | 4.80 (3.90-5.91)  | <0.001 |
| <b>Borderline Personality Disorder</b> |                 |              |                   |        |
| No                                     | 2478<br>(99.6%) | 4268 (89.6%) | ref               |        |
| Yes                                    | 11 (<1%)        | 496 (10.4%)  | 26.2 (14.4-47.7)  | <0.001 |
| <b>Bipolar Disorder</b>                |                 |              |                   |        |
| No                                     | 2476<br>(99.5%) | 4542 (95.3%) | ref               |        |
| Yes                                    | 13 (<1%)        | 222 (4.67%)  | 9.31 (5.31-16.3)  | <0.001 |
| <b>Anxiety</b>                         |                 |              |                   |        |
| No                                     | 2476<br>(99.5%) | 4669 (98.0%) | ref               |        |
| Yes                                    | 13 (<1%)        | 95 (2.0%)    | 3.88 (2.17-6.93)  | <0.001 |
| <b>Other Personality Disorder</b>      |                 |              |                   |        |
| No                                     | 2472<br>(99.3%) | 4116 (86.4%) | ref               |        |
| Yes                                    | 17 (<1%)        | 648 (13.6%)  | 22.9 (14.1 -37.1) | <0.001 |

307  
308  
309  
310  
311

### Multivariable analysis of the effect of comorbid psychiatric diagnoses on self-harm and suicidality

[Type here]

When adjusting for demographics and the primary ED diagnosis, depression, bipolar disorder, other PD, substance misuse and alcohol use disorder remained significantly associated with suicidal behaviour. However, after adjusting for the demographics BPD remained only associated with self-harm (OR 2.84, 0.84-9.68,  $p=0.09$ ) and not with suicidality (OR =1.52, 0.51-4.50,  $p=0.45$ ). Anxiety disorders remained associated with suicidality (OR =1.93, 95% CI 1.01-3.69,  $p=0.05$ ) but not self-harm (OR =1.47, 95% CI 0.81-2.65,  $p=0.20$ ) as shown in Table 6 (i) and (ii).

**Table 6 (i) Multivariable logistic regression examining the association between psychiatric comorbidities and self-harm;** adjusted for demographics & ED diagnosis

| Comorbid diagnosis              | Adjusted Odds Ratio (95% CI) | P Value |
|---------------------------------|------------------------------|---------|
| Borderline Personality Disorder | 2.84 (0.84-9.64)             | 0.09    |
| Anxiety disorders               | 1.47 (0.81-2.65)             | 0.20    |
| Depression                      | 3.38 (2.72-4.21)             | <0.001  |
| Bipolar disorder                | 5.49 (2.97-10.2)             | <0.001  |
| Other PD                        | 13.3 (5.72-30.8)             | <0.001  |
| Alcohol                         | 5.26 (2.67-10.3)             | <0.001  |
| Substance misuse                | 4.35 (1.65-11.5)             | 0.003   |

**Table 6 (ii) Multivariable logistic regression examining the association between psychiatric comorbidities and suicidality;** adjusted for demographics & ED diagnosis

| Comorbid diagnosis              | Adjusted Odds Ratio (95% CI) | P Value |
|---------------------------------|------------------------------|---------|
| Borderline Personality Disorder | 1.52 (0.51-4.50)             | 0.45    |
| Anxiety disorders               | 1.93 (1.01-3.69)             | 0.05    |
| Depression                      | 3.62 (2.87-4.57)             | <0.001  |
| Bipolar disorder                | 5.07 (2.69-9.56)             | <0.001  |
| Other PD                        | 11.6 (4.94-26.5)             | <0.001  |

[Type here]

|                      |                  |        |
|----------------------|------------------|--------|
| Alcohol use disorder | 5.75 (2.73-12.1) | <0.001 |
| Substance misuse     | 2.84 (1.16-6.98) | 0.02   |

329

330

331

332

333

334

## Discussion

### Accuracy of the NLP output

336

337

338

339

340

341

342

343

344

345

346

347

348

349

350

351

352

353

354

355

356

357

358

359

360

361

362

363

364

365

366

367

368

369

370

371

372

373

374

375

376

### Discussion of clinical findings

349

350

351

352

353

354

355

356

357

358

359

360

361

362

363

364

365

366

367

368

369

370

371

[Type here]

1  
2  
3 365 aimed at supporting those diagnosed with BPD and self-harm have been shown to be  
4 366 effective at also supporting patients with a diagnosis of ED (46, 47).

5 367 Similarly, those with a diagnosis of alcohol or substance misuse had an elevated odds  
6 368 of reporting self-harm and suicidality. Substance and alcohol misuse are associated with  
7 369 impulsivity; impulsivity is associated with behaviours such as bingeing and purging and  
8 370 suicidal behaviour (48-50) which has been shown to increase risk of completed suicide (51,  
9 371 52). Bipolar Disorder was also significantly associated with a five-fold increase in odds of  
10 372 suicidal behaviour when adjusted for demographics and the primary ED diagnosis. This is  
11 373 consistent with previous studies demonstrating an increased risk of hospitalised suicide  
12 374 attempts in ED patients with bipolar disorder compared to those without (17).

13 375 Relative to BN and other EDs, AN presented with the highest risk of suicidal  
14 376 behaviour, particularly suicidality. This is consistent with previous studies reporting a higher  
15 377 prevalence of suicide attempts and completed suicide in individuals with AN compared to  
16 378 those with BN or other EDs (5, 17, 23). However, it is important to consider the number of  
17 379 studies reporting suicidal behaviour most prevalent in BN (24, 50, 53). One explanation for  
18 380 the difference between our results and the above findings is that the current study used a  
19 381 diagnostic hierarchy of AN>BN>EDNOS to assign a primary ED diagnosis to patients; we  
20 382 know there is a well-established diagnostic crossover between EDs, with 50% of patients  
21 383 initially being diagnosed with AN being re-diagnosed with BN or AN-binge purge subtype  
22 384 (54). Evidence also indicates that individuals experiencing diagnostic cross-over may be at  
23 385 particularly elevated risk of suicidality (55). Therefore, there could be a subtype of particular  
24 386 interest; future investigations should focus on diagnostic flux and whether the suicidal  
25 387 behaviour risk correlates to fluctuating ED symptoms (26).

26 388 This study highlights the importance of further understanding the shared mechanisms  
27 389 for suicidal behaviour and ED diagnosis. There are various explanations that have been  
28 390 hypothesised for the high risk of self-harm and suicidality; some studies have suggested there  
29 391 are shared genetic factors predisposing to both conditions (56, 57). Others suggest that  
30 392 emotional dysregulation is associated with EDs and others demonstrate that adjusting for  
31 393 comorbid psychiatric disorders weakens any association (22, 56, 57). Increased pain tolerance  
32 394 and fearlessness for death are other hypotheses for the increased risk amongst patients  
33 395 diagnosed with EDs (58). The interpersonal theory of suicide describes that a higher lethality  
34 396 attempt requires both a desire for death and capability for suicide; capability of suicide has  
35 397 been theorised as developing after gradual chronic exposure to painful ED behaviours and  
36 398 habituation to fear and pain (59, 60). Therefore, extreme restrictive eating may differentiate  
37 399 AN from other EDs, increasing the capability of both self-harm and suicidality (60).

### 400 401 **Strengths and limitations**

402  
403 The main strengths of this study are the size of the cohort (>7400), the longitudinal  
404 study design and long period of time for follow up (12.5 years), facilitated by the use of the

[Type here]

1  
2  
3  
4 405 CRIS database. There is currently a limited body of research on correlates and risk factors for  
5 406 suicidal behaviour amongst ED patients and previous studies have small numbers and a high  
6  
7 407 usage of cross-sectional studies as well as studies at risk of reporting bias (26). The NLP  
8  
9 408 approach used to extract clinician documentation of self-harm and suicidality from narrative  
10  
11 409 text in EHRs reduces the risk of reporting bias and allows access to detailed clinical  
12  
13 410 information that would not be available from EHR structured fields (30, 35).

14 411 The main limitation of this study is that the tools were not able to consider the timing  
15  
16 412 of reported suicidality or self-harm relative to the ED diagnosis. Therefore, it is possible the  
17  
18 413 reported suicidal behaviour was prior to ED diagnosis; an improvement of the NLP tool  
19  
20 414 would be to include temporality to understand specific time periods of risk for self-harm or  
21  
22 415 reported suicidality. Another consideration is that due to changing diagnostic codes between  
23  
24 416 the follow up period of 2007-2020 and the introduction of the ICD-11 codes of binge eating  
25  
26 417 disorder, we had to include all EDs aside from AN and BN into one heterogenous group of  
27  
28 418 diagnoses 'Other EDs'. This was needed to ensure consistency over the time period and to  
29  
30 419 avoid the problem of small group sizes in the regression analysis. Furthermore, given that  
31  
32 420 EHRs include routine clinical data not primarily collected for research purposes, the study  
33  
34 421 relies on clinician documentation which could include non-grammatical errors, jargon and  
35  
36 422 idiosyncratic abbreviations; all of these could increase the chance of NLP misclassification  
37  
38 423 (35). However, this was mitigated by using all documents available for each patient.

39 424 Therefore, there were multiple opportunities to capture suicidality information to compensate  
40  
41 425 for lack of sensitivity of the tool. Finally, the data relies on recording of suicidality and self-  
42  
43 426 harm following a clinical encounter. This is likely to result in some heterogeneity at a  
44  
45 427 document level, as some healthcare professionals may be more likely to discuss or record  
46  
47 428 self-harm or suicidal thoughts depending on their level of experience, clinical background or  
48  
49 429 their prior knowledge of the patient. However as there only needed to be one positive  
50  
51 430 mention of self-harm or one positive mention of suicidality, at a patient level, the threshold  
52  
53 431 was low for detection of either outcome.

54 432

### 55 433 **Clinical and research implications**

56 434 This study highlights the importance of risk assessment screening in all patients  
57  
58 435 diagnosed with EDs, with a particular emphasis on those diagnosed with AN and ED patients  
59  
60 436 with comorbid psychiatric diagnoses. This study also highlights the potential use of EHR  
61  
62 437 databases to further suicidality and self-harm research by utilising NLP techniques. These  
63  
64 438 tools could potentially have use with further development in risk prediction within ED

[Type here]

439 services; their use along clinician reported decisions could help predict future suicidal  
440 behaviour in ED patients (13, 30).

441

442 **Funding statement:** This research did not receive a specific grant, but the primary researcher  
443 CC was supported by an NIHR Academic Clinical Fellowship training post and with support  
444 from the Biomedical Research Centre at the IoPPN.

445 **Competing interests:** nil

446 **Data Availability:** The data is made available under specific governance requirements:  
447 researchers need to have a contract with the South London and Maudsley NHS Trust, which  
448 can be applied for relevant research studies. Each research project is reviewed by a service-  
449 user led oversight committee of the National Institute of Health Research Biomedical  
450 Research Centre. On request, and after appropriate arrangements, the data and modelling  
451 employed in this study can be viewed within the secure system firewall

452 **Contribution:** Author's contribution: CC led the project, conducted the data analysis and  
453 wrote the final manuscript; RD supported with the title, analysis and final manuscript. US  
454 contributed with the final manuscript and topic expertise. AB, SV and HS conducted data  
455 extraction and analysis. AS and KV conducted data analysis and support with final  
456 manuscript.

457

## 458 **References**

459

- 460 1. Himmerich H, Hotopf M, Shetty H, Schmidt U, Treasure J, Hayes RD, et al.  
461 Psychiatric comorbidity as a risk factor for the mortality of people with bulimia nervosa. *Soc*  
462 *Psychiatry Psychiatr Epidemiol.* 2019b;54(7):813-21.
- 463 2. Himmerich H, Hotopf M, Shetty H, Schmidt U, Treasure J, Hayes RD, et al.  
464 Psychiatric comorbidity as a risk factor for mortality in people with anorexia nervosa.  
465 *European Archives of Psychiatry and Clinical Neuroscience.* 2019a;269(3):351-9.
- 466 3. Nielsen S. EPIDEMIOLOGY AND MORTALITY OF EATING DISORDERS.  
467 *Psychiatric Clinics of North America.* 2001;24(2):201-14.
- 468 4. Keshaviah A, Edkins K, Hastings ER, Krishna M, Franko DL, Herzog DB, et al. Re-  
469 examining premature mortality in anorexia nervosa: a meta-analysis redux. *Compr*  
470 *Psychiatry.* 2014;55(8):1773-84.
- 471 5. Preti A, Rocchi MB, Sisti D, Camboni MV, Miotto P. A comprehensive meta-analysis  
472 of the risk of suicide in eating disorders. *Acta Psychiatr Scand.* 2011;124(1):6-17.
- 473 6. Crow SJ, Peterson CB, Swanson SA, Raymond NC, Specker S, Eckert ED, et al.  
474 Increased mortality in bulimia nervosa and other eating disorders. *Am J Psychiatry.*  
475 2009;166(12):1342-6.
- 476 7. Kostro K, Lerman JB, Attia E. The current status of suicide and self-injury in eating  
477 disorders: a narrative review. *Journal of Eating Disorders.* 2014;2(1):19.

[Type here]

- 1  
2  
3 478 8. Hamza CA, Stewart SL, Willoughby T. Examining the link between nonsuicidal self-  
4 479 injury and suicidal behavior: a review of the literature and an integrated model. *Clin Psychol*  
5 480 *Rev.* 2012;32(6):482-95.
- 6 481 9. Brown RC, Plener PL. Non-suicidal Self-Injury in Adolescence. *Curr Psychiatry Rep.*  
7 482 2017;19(3):20.
- 8 483 10. McCullumsmith C. Laying the groundwork for standardized assessment of suicidal  
9 484 behavior. *J Clin Psychiatry.* 2015;76(10):e1333-5.
- 10 485 11. Gairin I, House A, Owens D. Attendance at the accident and emergency department in  
11 486 the year before suicide: Retrospective study. *British Journal of Psychiatry.* 2003;183(1):28-  
12 487 33.
- 13 488 12. Foster T, Gillespie K, McClelland R. Mental disorders and suicide in Northern  
14 489 Ireland. *Br J Psychiatry.* 1997;170:447-52.
- 15 490 13. Nock MK, Borges G, Bromet EJ, Alonso J, Angermeyer M, Beautrais A, et al. Cross-  
16 491 national prevalence and risk factors for suicidal ideation, plans and attempts. *Br J Psychiatry.*  
17 492 2008;192(2):98-105.
- 18 493 14. Swanson SA, Crow SJ, Le Grange D, Swendsen J, Merikangas KR. Prevalence and  
19 494 correlates of eating disorders in adolescents. Results from the national comorbidity survey  
20 495 replication adolescent supplement. *Arch Gen Psychiatry.* 2011;68(7):714-23.
- 21 496 15. Claes L, Vandereycken W, Vertommen H. Self-injurious behaviors in eating-  
22 497 disordered patients. *Eat Behav.* 2001;2(3):263-72.
- 23 498 16. Cipriano A, Cella S, Cotrufo P. Nonsuicidal Self-injury: A Systematic Review. *Front*  
24 499 *Psychol.* 2017;8:1946.
- 25 500 17. Cliffe C, Shetty H, Himmerich H, Schmidt U, Stewart R, Dutta R. Suicide attempts  
26 501 requiring hospitalization in patients with eating disorders: a retrospective cohort study.  
27 502 *International journal of eating disorders.* 2020;ePub(ePub):ePub-ePub.
- 28 503 18. Svirko E, Hawton K. Self-injurious behavior and eating disorders: the extent and  
29 504 nature of the association. *Suicide Life Threat Behav.* 2007;37(4):409-21.
- 30 505 19. Claes L, Fernández-Aranda F, Jimenez-Murcia S, Botella C, Casanueva FF, de la  
31 506 Torre R, et al. Co-occurrence of non-suicidal self-injury and impulsivity in extreme weight  
32 507 conditions. *Personality and Individual Differences.* 2013;54(1):137-40.
- 33 508 20. Cucchi A, Ryan D, Konstantakopoulos G, Stroumpa S, Kaçar A, Renshaw S, et al.  
34 509 Lifetime prevalence of non-suicidal self-injury in patients with eating disorders: a systematic  
35 510 review and meta-analysis. *Psychol Med.* 2016;46(7):1345-58.
- 36 511 21. Forcano L, Álvarez E, Santamaría JJ, Jimenez-Murcia S, Granero R, Penelo E, et al.  
37 512 Suicide attempts in anorexia nervosa subtypes. *Comprehensive Psychiatry.* 2011;52(4):352-8.
- 38 513 22. Forrest LN, Zuromski KL, Dodd DR, Smith AR. Suicidality in adolescents and adults  
39 514 with binge-eating disorder: Results from the national comorbidity survey replication and  
40 515 adolescent supplement. *International Journal of Eating Disorders.* 2017;50(1):40-9.
- 41 516 23. Franko DL, Keel PK, Dorer DJ, Blais MA, Delinsky SS, Eddy KT, et al. What  
42 517 predicts suicide attempts in women with eating disorders? *Psychol Med.* 2004;34(5):843-53.
- 43 518 24. Favaro A, Santonastaso P. Suicidality in eating disorders: clinical and psychological  
44 519 correlates. *Acta Psychiatr Scand.* 1997;95(6):508-14.
- 45 520 25. Franko DL, Keel PK. Suicidality in eating disorders: occurrence, correlates, and  
46 521 clinical implications. *Clin Psychol Rev.* 2006;26(6):769-82.
- 47 522 26. Goldstein A, Gvion Y. Socio-demographic and psychological risk factors for suicidal  
48 523 behavior among individuals with anorexia and bulimia nervosa: A systematic review. *J*  
49 524 *Affect Disord.* 2019;245:1149-67.
- 50 525 27. Mayes SD, Fernandez-Mendoza J, Baweja R, Calhoun S, Mahr F, Aggarwal R, et al.  
51 526 Correlates of suicide ideation and attempts in children and adolescents with eating disorders.  
52 527 *Eat Disord.* 2014;22(4):352-66.

[Type here]



- 1  
2  
3 528 28. Bulik CM, Thornton L, Pinheiro AP, Plotnicov K, Klump KL, Brandt H, et al. Suicide  
4 529 attempts in anorexia nervosa. *Psychosom Med*. 2008;70(3):378-83.
- 5 530 29. Vieira AI, Machado BC, Machado PPP, Brandão I, Roma-Torres A, Gonçalves S.  
6 531 Putative Risk Factors for Non-Suicidal Self-Injury in Eating Disorders. *Eur Eat Disord Rev*.  
7 532 2017;25(6):544-50.
- 8 533 30. Barak-Corren Y, Castro VM, Javitt S, Hoffnagle AG, Dai Y, Perlis RH, et al.  
9 534 Predicting Suicidal Behavior From Longitudinal Electronic Health Records. *Am J Psychiatry*.  
10 535 2017;174(2):154-62.
- 11 536 31. Fernandes AC, Dutta R, Velupillai S, Sanyal J, Stewart R, Chandran D. Identifying  
12 537 Suicide Ideation and Suicidal Attempts in a Psychiatric Clinical Research Database using  
13 538 Natural Language Processing. *Scientific Reports*. 2018;8(1):7426.
- 14 539 32. Spasic I, Nenadic G. Clinical Text Data in Machine Learning: Systematic Review.  
15 540 *JMIR Med Inform*. 2020;8(3):e17984.
- 16 541 33. Haerian K, Salmasian H, Friedman C. Methods for identifying suicide or suicidal  
17 542 ideation in EHRs. *AMIA Annu Symp Proc*. 2012;2012:1244-53.
- 18 543 34. Downs J, Velupillai S, George G, Holden R, Kikoler M, Dean H, et al. Detection of  
19 544 Suicidality in Adolescents with Autism Spectrum Disorders: Developing a Natural Language  
20 545 Processing Approach for Use in Electronic Health Records. *AMIA Annu Symp Proc*.  
21 546 2017;2017:641-9.
- 22 547 35. Velupillai S, Epstein S, Bittar A, Stephenson T, Dutta R, Downs J. Identifying  
23 548 Suicidal Adolescents from Mental Health Records Using Natural Language Processing. *Stud*  
24 549 *Health Technol Inform*. 2019;264:413-7.
- 25 550 36. Ayre KaD, Rina and Bittar, Andre and Pritchard, Megan and Howard, Louise, .  
26 551 Suicide and Self-Harm in Women with Mental Disorders During Pregnancy and the Year  
27 552 after Birth. Available at SSRN: <https://ssrn.com/abstract=3687375> or  
28 553 <http://dx.doi.org/10.2139/ssrn.3687375>. 2020.
- 29 554 37. Stewart R, Soremekun M, Perera G, Broadbent M, Callard F, Denis M, et al. The  
30 555 South London and Maudsley NHS Foundation Trust Biomedical Research Centre (SLAM  
31 556 BRC) case register: development and descriptive data. *BMC Psychiatry*. 2009;9(1):51.
- 32 557 38. World Health Organization. (2004). ICD-10 : international statistical classification of  
33 558 diseases and related health problems : tenth revision neWHO.
- 34 559 39. Jackson RG, Patel R, Jayatilleke N, Kolliakou A, Ball M, Gorrell G, et al. Natural  
35 560 language processing to extract symptoms of severe mental illness from clinical text: the  
36 561 Clinical Record Interactive Search Comprehensive Data Extraction (CRIS-CODE) project.  
37 562 *BMJ Open*. 2017;7(1):e012012.
- 38 563 40. McHugh ML. Interrater reliability: the kappa statistic. *Biochem Med (Zagreb)*.  
39 564 2012;22(3):276-82.
- 40 565 41. Milos G, Spindler A, Hepp U, Schnyder U. Suicide attempts and suicidal ideation:  
41 566 Links with psychiatric comorbidity in eating disorder subjects. *General Hospital Psychiatry*.  
42 567 2004;26(2):129-35.
- 43 568 42. Rihmer Z. Can better recognition and treatment of depression reduce suicide rates? A  
44 569 brief review. *European Psychiatry*. 2001;16(7):406-9.
- 45 570 43. Nakar O, Brunner R, Schilling O, Chanen A, Fischer G, Parzer P, et al.  
46 571 Developmental trajectories of self-injurious behavior, suicidal behavior and substance misuse  
47 572 and their association with adolescent borderline personality pathology. *Journal of Affective*  
48 573 *Disorders*. 2016;197:231-8.
- 49 574 44. Reas DL, Pedersen G, Karterud S, Rø Ø. Self-harm and suicidal behavior in  
50 575 borderline personality disorder with and without bulimia nervosa. *J Consult Clin Psychol*.  
51 576 2015;83(3):643-8.
- 52  
53  
54  
55  
56  
57  
58  
59  
60

[Type here]

- 1  
2  
3 577 45. Muehlenkamp JJ, Takakuni S, Brausch AM, Peyerl N. Behavioral functions  
4 578 underlying NSSI and eating disorder behaviors. *J Clin Psychol.* 2019;75(7):1219-32.  
5 579 46. Peterson CM, Van Diest AMK, Mara CA, Matthews A. Dialectical behavioral therapy  
6 580 skills group as an adjunct to family-based therapy in adolescents with restrictive eating  
7 581 disorders. *Eat Disord.* 2020;28(1):67-79.  
8 582 47. Fischer S, Peterson C. Dialectical behavior therapy for adolescent binge eating,  
9 583 purging, suicidal behavior, and non-suicidal self-injury: a pilot study. *Psychotherapy (Chic).*  
10 584 2015;52(1):78-92.  
11 585 48. Fichter MM, Quadflieg N, Rief W. Course of multi-impulsive bulimia. *Psychological*  
12 586 *Medicine.* 1994;24(3):591-604.  
13 587 49. Lacey JH. Self-damaging and addictive behaviour in bulimia nervosa. A catchment  
14 588 area study. *Br J Psychiatry.* 1993;163:190-4.  
15 589 50. Fedorowicz VJ, Falissard B, Foulon C, Dardennes R, Divac SM, Guelfi JD, et al.  
16 590 Factors associated with suicidal behaviors in a large French sample of inpatients with eating  
17 591 disorders. *Int J Eat Disord.* 2007;40(7):589-95.  
18 592 51. Maser JD, Akiskal HS, Schettler P, Scheftner W, Mueller T, Endicott J, et al. Can  
19 593 temperament identify affectively ill patients who engage in lethal or near-lethal suicidal  
20 594 behavior? A 14-year prospective study. *Suicide Life Threat Behav.* 2002;32(1):10-32.  
21 595 52. Conner KR, Duberstein PR, Conwell Y, Seidlitz L, Caine ED. Psychological  
22 596 vulnerability to completed suicide: a review of empirical studies. *Suicide Life Threat Behav.*  
23 597 2001;31(4):367-85.  
24 598 53. Mandelli L, Arminio A, Atti AR, De Ronchi D. Suicide attempts in eating disorder  
25 599 subtypes: a meta-analysis of the literature employing DSM-IV, DSM-5, or ICD-10 diagnostic  
26 600 criteria. *Psychol Med.* 2019;49(8):1237-49.  
27 601 54. Eddy KT, Dorer DJ, Franko DL, Tahilani K, Thompson-Brenner H, Herzog DB.  
28 602 Diagnostic crossover in anorexia nervosa and bulimia nervosa: implications for DSM-V. *Am*  
29 603 *J Psychiatry.* 2008;165(2):245-50.  
30 604 55. Pisetsky EM, Thornton LM, Lichtenstein P, Pedersen NL, Bulik CM. Suicide  
31 605 attempts in women with eating disorders. *J Abnorm Psychol.* 2013;122(4):1042-56.  
32 606 56. Smith AR, Ortiz SN, Forrest LN, Velkoff EA, Dodd DR. Which Comes First? An  
33 607 Examination of Associations and Shared Risk Factors for Eating Disorders and Suicidality.  
34 608 *Curr Psychiatry Rep.* 2018;20(9):77.  
35 609 57. Yao S, Kuja-Halkola R, Thornton LM, Runfola CD, D'Onofrio BM, Almqvist C, et  
36 610 al. Familial Liability for Eating Disorders and Suicide Attempts: Evidence From a Population  
37 611 Registry in Sweden. *JAMA Psychiatry.* 2016;73(3):284-91.  
38 612 58. Dodd DR, Smith AR, Forrest LN, Witte TK, Bodell L, Bartlett M, et al. Interoceptive  
39 613 Deficits, Nonsuicidal Self-Injury, and Suicide Attempts Among Women with Eating  
40 614 Disorders. *Suicide and Life-Threatening Behavior.* 2018;48(4):438-48.  
41 615 59. Van Orden KA, Witte TK, Cukrowicz KC, Braithwaite SR, Selby EA, Joiner TE, Jr.  
42 616 The interpersonal theory of suicide. *Psychol Rev.* 2010;117(2):575-600.  
43 617 60. Forrest LN, Bodell LP, Witte TK, Goodwin N, Bartlett ML, Siegfried N, et al.  
44 618 Associations between eating disorder symptoms and suicidal ideation through thwarted  
45 619 belongingness and perceived burdensomeness among eating disorder patients. *Journal of*  
46 620 *Affective Disorders.* 2016;195:127-35.  
47 621

[Type here]

Supplementary File Figure 1

**Figure 1: Workflow for validation of both NLP tools**

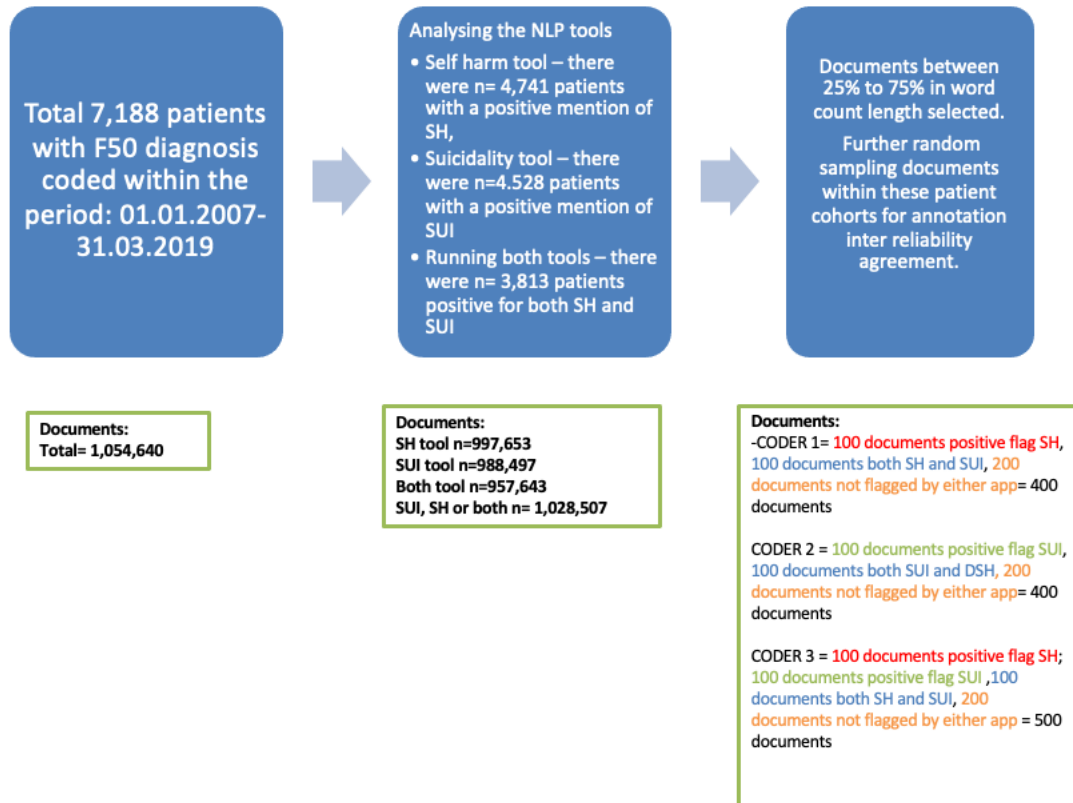

ew only

STROBE Statement—Checklist of items that should be included in reports of *cohort studies*

|                              | Item No | Recommendation                                                                                                                                                                                                                                                                                                         | Page No |
|------------------------------|---------|------------------------------------------------------------------------------------------------------------------------------------------------------------------------------------------------------------------------------------------------------------------------------------------------------------------------|---------|
| <b>Title and abstract</b>    | 1       | (a) Indicate the study's design with a commonly used term in the title or the abstract<br>(b) Provide in the abstract an informative and balanced summary of what was done and what was found                                                                                                                          | 1       |
| <b>Introduction</b>          |         |                                                                                                                                                                                                                                                                                                                        |         |
| Background/rationale         | 2       | Explain the scientific background and rationale for the investigation being reported                                                                                                                                                                                                                                   | 2       |
| Objectives                   | 3       | State specific objectives, including any prespecified hypotheses                                                                                                                                                                                                                                                       | 2       |
| <b>Methods</b>               |         |                                                                                                                                                                                                                                                                                                                        |         |
| Study design                 | 4       | Present key elements of study design early in the paper                                                                                                                                                                                                                                                                | 3       |
| Setting                      | 5       | Describe the setting, locations, and relevant dates, including periods of recruitment, exposure, follow-up, and data collection                                                                                                                                                                                        | 3       |
| Participants                 | 6       | (a) Give the eligibility criteria, and the sources and methods of selection of participants. Describe methods of follow-up<br>(b) For matched studies, give matching criteria and number of exposed and unexposed                                                                                                      | 3       |
| Variables                    | 7       | Clearly define all outcomes, exposures, predictors, potential confounders, and effect modifiers. Give diagnostic criteria, if applicable                                                                                                                                                                               | 3       |
| Data sources/<br>measurement | 8*      | For each variable of interest, give sources of data and details of methods of assessment (measurement). Describe comparability of assessment methods if there is more than one group                                                                                                                                   | 3       |
| Bias                         | 9       | Describe any efforts to address potential sources of bias                                                                                                                                                                                                                                                              | 4       |
| Study size                   | 10      | Explain how the study size was arrived at                                                                                                                                                                                                                                                                              | 4       |
| Quantitative variables       | 11      | Explain how quantitative variables were handled in the analyses. If applicable, describe which groupings were chosen and why                                                                                                                                                                                           | 5       |
| Statistical methods          | 12      | (a) Describe all statistical methods, including those used to control for confounding<br>(b) Describe any methods used to examine subgroups and interactions<br>(c) Explain how missing data were addressed<br>(d) If applicable, explain how loss to follow-up was addressed<br>(e) Describe any sensitivity analyses | 5       |
| <b>Results</b>               |         |                                                                                                                                                                                                                                                                                                                        |         |
| Participants                 | 13*     | (a) Report numbers of individuals at each stage of study—eg numbers potentially eligible, examined for eligibility, confirmed eligible, included in the study, completing follow-up, and analysed<br>(b) Give reasons for non-participation at each stage<br>(c) Consider use of a flow diagram                        | 5-6     |
| Descriptive data             | 14*     | (a) Give characteristics of study participants (eg demographic, clinical, social) and information on exposures and potential confounders<br>(b) Indicate number of participants with missing data for each variable of interest<br>(c) Summarise follow-up time (eg, average and total amount)                         | 5-6     |
| Outcome data                 | 15*     | Report numbers of outcome events or summary measures over time                                                                                                                                                                                                                                                         | 7       |

|    |                          |    |                                                                                                                                                                                                              |     |
|----|--------------------------|----|--------------------------------------------------------------------------------------------------------------------------------------------------------------------------------------------------------------|-----|
| 1  | Main results             | 16 | (a) Give unadjusted estimates and, if applicable, confounder-adjusted estimates and their precision (eg, 95% confidence interval). Make clear which confounders were adjusted for and why they were included | 5-7 |
| 2  |                          |    | (b) Report category boundaries when continuous variables were categorized                                                                                                                                    |     |
| 3  |                          |    | (c) If relevant, consider translating estimates of relative risk into absolute risk for a meaningful time period                                                                                             |     |
| 4  |                          |    |                                                                                                                                                                                                              |     |
| 5  |                          |    |                                                                                                                                                                                                              |     |
| 6  |                          |    |                                                                                                                                                                                                              |     |
| 7  |                          |    |                                                                                                                                                                                                              |     |
| 8  |                          |    |                                                                                                                                                                                                              |     |
| 9  | Other analyses           | 17 | Report other analyses done—eg analyses of subgroups and interactions, and sensitivity analyses                                                                                                               | 5-7 |
| 10 |                          |    |                                                                                                                                                                                                              |     |
| 11 | <b>Discussion</b>        |    |                                                                                                                                                                                                              |     |
| 12 |                          |    |                                                                                                                                                                                                              |     |
| 13 | Key results              | 18 | Summarise key results with reference to study objectives                                                                                                                                                     | 7-8 |
| 14 | Limitations              | 19 | Discuss limitations of the study, taking into account sources of potential bias or imprecision. Discuss both direction and magnitude of any potential bias                                                   | 8   |
| 15 |                          |    |                                                                                                                                                                                                              |     |
| 16 | Interpretation           | 20 | Give a cautious overall interpretation of results considering objectives, limitations, multiplicity of analyses, results from similar studies, and other relevant evidence                                   | 8   |
| 17 |                          |    |                                                                                                                                                                                                              |     |
| 18 |                          |    |                                                                                                                                                                                                              |     |
| 19 | Generalisability         | 21 | Discuss the generalisability (external validity) of the study results                                                                                                                                        | 8   |
| 20 |                          |    |                                                                                                                                                                                                              |     |
| 21 | <b>Other information</b> |    |                                                                                                                                                                                                              |     |
| 22 | Funding                  | 22 | Give the source of funding and the role of the funders for the present study and, if applicable, for the original study on which the present article is based                                                | 9   |
| 23 |                          |    |                                                                                                                                                                                                              |     |
| 24 |                          |    |                                                                                                                                                                                                              |     |

\*Give information separately for exposed and unexposed groups.

**Note:** An Explanation and Elaboration article discusses each checklist item and gives methodological background and published examples of transparent reporting. The STROBE checklist is best used in conjunction with this article (freely available on the Web sites of PLoS Medicine at <http://www.plosmedicine.org/>, Annals of Internal Medicine at <http://www.annals.org/>, and Epidemiology at <http://www.epidem.com/>). Information on the STROBE Initiative is available at <http://www.strobe-statement.org>.

# BMJ Open

## Using natural language processing to extract self-harm and suicidality data from a clinical sample of patients with eating disorders: a retrospective cohort study

|                                 |                                                                                                                                                                                                                                                                                                                                                                                                                                                                                                                                                                                                    |
|---------------------------------|----------------------------------------------------------------------------------------------------------------------------------------------------------------------------------------------------------------------------------------------------------------------------------------------------------------------------------------------------------------------------------------------------------------------------------------------------------------------------------------------------------------------------------------------------------------------------------------------------|
| Journal:                        | <i>BMJ Open</i>                                                                                                                                                                                                                                                                                                                                                                                                                                                                                                                                                                                    |
| Manuscript ID                   | bmjopen-2021-053808.R2                                                                                                                                                                                                                                                                                                                                                                                                                                                                                                                                                                             |
| Article Type:                   | Original research                                                                                                                                                                                                                                                                                                                                                                                                                                                                                                                                                                                  |
| Date Submitted by the Author:   | 28-Sep-2021                                                                                                                                                                                                                                                                                                                                                                                                                                                                                                                                                                                        |
| Complete List of Authors:       | cliffe, charlotte; King's College London, Biomedical research council<br>Seyedsalehi, Aida; Cambridge University<br>Vardavoulia, Katerina; King's College London, Psychology, Psychiatry and Neuroscience<br>Bittar, André<br>Velupillai, Sumithra; Kings College London, Institute of Psychiatry, Psychology and Neuroscience<br>Shetty, Hitesh; South London and Maudsley NHS Foundation Trust, Biomedical Research Centre Nucleus<br>Schmidt, Ulrike; Institute of Psychiatry, KCL, Eating Disorders<br>Dutta, Rina; Kings College London, Institute of Psychiatry, Psychology and Neuroscience |
| <b>Primary Subject Heading</b>: | Mental health                                                                                                                                                                                                                                                                                                                                                                                                                                                                                                                                                                                      |
| Secondary Subject Heading:      | Health informatics                                                                                                                                                                                                                                                                                                                                                                                                                                                                                                                                                                                 |
| Keywords:                       | Eating disorders < PSYCHIATRY, Suicide & self-harm < PSYCHIATRY, BIOTECHNOLOGY & BIOINFORMATICS, EPIDEMIOLOGY                                                                                                                                                                                                                                                                                                                                                                                                                                                                                      |
|                                 |                                                                                                                                                                                                                                                                                                                                                                                                                                                                                                                                                                                                    |

SCHOLARONE™  
Manuscripts



I, the Submitting Author has the right to grant and does grant on behalf of all authors of the Work (as defined in the below author licence), an exclusive licence and/or a non-exclusive licence for contributions from authors who are: i) UK Crown employees; ii) where BMJ has agreed a CC-BY licence shall apply, and/or iii) in accordance with the terms applicable for US Federal Government officers or employees acting as part of their official duties; on a worldwide, perpetual, irrevocable, royalty-free basis to BMJ Publishing Group Ltd ("BMJ") its licensees and where the relevant Journal is co-owned by BMJ to the co-owners of the Journal, to publish the Work in this journal and any other BMJ products and to exploit all rights, as set out in our [licence](#).

The Submitting Author accepts and understands that any supply made under these terms is made by BMJ to the Submitting Author unless you are acting as an employee on behalf of your employer or a postgraduate student of an affiliated institution which is paying any applicable article publishing charge ("APC") for Open Access articles. Where the Submitting Author wishes to make the Work available on an Open Access basis (and intends to pay the relevant APC), the terms of reuse of such Open Access shall be governed by a Creative Commons licence – details of these licences and which [Creative Commons](#) licence will apply to this Work are set out in our licence referred to above.

Other than as permitted in any relevant BMJ Author's Self Archiving Policies, I confirm this Work has not been accepted for publication elsewhere, is not being considered for publication elsewhere and does not duplicate material already published. I confirm all authors consent to publication of this Work and authorise the granting of this licence.

1  
2  
3 1  
4  
5 2  
6  
7  
8  
9 **Using natural language processing to extract self-harm and**  
10 **suicidality data from a clinical sample of patients with eating**  
11 **disorders: a retrospective cohort study**  
12  
13  
14  
15  
16  
17  
18

19 Charlotte Cliffe<sup>1</sup>, Aida Seyedsalehi<sup>1</sup>, Katerina Vardavoulia<sup>1</sup>, Andre Bittar<sup>1</sup>, Sumithra  
20 Velupillai<sup>1</sup>, Hitesh Shetty<sup>1</sup>, Ulrike Schmidt<sup>1</sup>, Rina Dutta<sup>1</sup>  
21  
22  
23  
24  
25  
26  
27  
28  
29  
30  
31  
32  
33  
34  
35  
36  
37  
38  
39  
40  
41  
42  
43  
44  
45  
46  
47  
48  
49

50  
51  
52  
53  
54  
55  
56  
57  
58  
59  
60  
*Corresponding author: Charlotte Cliffe, charlotte.cliffe@kcl.ac.uk; 07795341866; post to:  
BRC Nucleus; Kings College London; Denmark Hill; no fax number*

**Key words:** self-harm, suicidality, eating disorders, electronic health records, natural  
language processing

**Word count:** 3612



1  
2  
3  
4 3 Using natural language processing to extract self-harm and suicidality data from a  
5 4 clinical sample of patients with eating disorders: a retrospective cohort study  
6  
7 5  
8

9 6 Charlotte Cliffe, Aida Seyedsalehi, Katerina Vardavoulia, Andre Bittar, Sumithra Velupillai,  
10  
11 7 Ulrike Schmidt, Rina Dutta

12 8 **Abstract**  
13  
14 9

15  
16 10 **Objectives:** The objective of this study was to determine risk factors for those diagnosed with  
17 11 eating disorders who report self-harm and suicidality.

18  
19 12 **Design & Setting:** This study was a retrospective cohort study within a secondary mental  
20 13 health service, South London & Maudsley NHS Trust. **Participants:** All diagnosed with an  
21 14 F50 diagnosis of eating disorder from 01/2009-09/2019 were included. **Intervention and**  
22 15 **measures:** Electronic health records (EHRs) for these patients were extracted and two natural  
23 16 language processing tools were used to determine documentation of self-harm and suicidality  
24 17 in their clinical notes. These tools were validated manually for attribute agreement scores  
25 18 within this study.

26 19 **Results:** The attribute agreements for precision of positive mentions of self-harm were 0.96  
27 20 and for suicidality were 0.80; this demonstrates a 'near perfect' and 'strong' agreement and  
28 21 highlights the reliability of the tools in identifying the EHRs reporting self-harm or  
29 22 suicidality. There were 7434 patients with EHRs available and diagnosed with eating  
30 23 disorders included in the study from the dates 01/2007 to 09/2019. Of these, 4591(61.8%)  
31 24 had a mention of self-harm within their records and 4764 (64.0%) had a mention of  
32 25 suicidality; 3899 (52.4%) had mentions of both. Patients reporting either self-harm or  
33 26 suicidality were more likely to have a diagnosis of anorexia nervosa (self-harm, AN  
34 27 OR=3.44, 95% CI1.05-11.3, p=0.04; suicidality, AN OR=8.20, 95% CI 2.17-30.1; p=0.002).  
35 28 They were also more likely to have a diagnosis of borderline personality disorder (p<0.001),  
36 29 bipolar disorder (p<0.001) or substance misuse disorder (p<0.001).

37 30 **Conclusion:** A high percentage of patients (>60%) diagnosed with eating disorders report  
38 31 either self-harm or suicidal thoughts. Relative to other eating disorders, those diagnosed with  
39 32 anorexia nervosa were more likely to report either self-harm or suicidal thoughts. Psychiatric  
40 33 comorbidity, in particular borderline personality disorder and substance misuse were also  
41 34 associated with an increase risk in self-harm and suicidality. Therefore, risk assessment  
42 35 amongst patients diagnosed with eating disorders is crucial.  
43 36

44  
45  
46  
47  
48  
49  
50  
51  
52  
53  
54  
55  
56  
57  
58  
59  
60  
[Type here]

## Article Summary: Strengths and Limitations of this study

1. The size of the cohort is over 7400 patients
2. Long period of follow up (12.5 years)
3. Limited number of study designs (most cross sectional) reporting on suicidal behaviour amongst those with EDs
4. The tools used to detect self-harm and suicidality are not able to consider the temporality in relation to the ED diagnosis; therefore, the suicidal behaviour could have been detected prior to diagnosis
5. The clinical records are routine clinical data not primarily collected for research therefore rely on clinician documentation.

Word count: 3827

## Introduction

Patients diagnosed with eating disorders (EDs), including anorexia nervosa (AN), bulimia nervosa (BN) and eating disorder not otherwise specified (EDNOS)<sup>1</sup> are at a greater risk of mortality compared to the general population (1, 2). A major contribution to this increased mortality rate is the higher risk of completed suicide in patients with EDs (3). Individuals with a lifetime diagnosis of AN and BN are 18 and 7 times more likely to die from suicide compared to age-matched general population controls, respectively (4, 5). Those with a diagnosis of EDNOS are 4 times more likely to complete suicide (6). Therefore, given the elevated risk of suicide amongst patients diagnosed with EDs, it is of utmost importance that factors associated with this risk are determined (7).

Self-harm and suicidal ideation are both strong predictors of subsequent suicide (8). Self-harm can be defined as ‘self-injurious behaviour characterised by deliberate harm to the body in the absence of an intent to die’ (9) and suicidal ideation can be defined as ‘thoughts about killing oneself, which may or may not include a plan’ (10). It has been determined that a common antecedent for completed suicide in the general population, is previous self harm, with up to 60% of people who complete suicide having previously self-harmed, the majority

---

<sup>1</sup> The DSM-V now refers to ‘Otherwise specified feeding or eating disorder’ (OFSED); but the studies and data included in this paper used the DSM-IV equivalent term of EDNOS.

[Type here]

1  
2  
3  
4 70 within one year prior to the attempt (11, 12). Lifetime suicidal ideation is also associated with  
5 71 attempted suicide (up to 30%); those with a plan have an increased risk of completed suicide  
6 72 (up to 55%) and the majority of attempts occur within the first year of the onset of suicidal  
7 73 ideation (13). Therefore, identifying patients who report either lifetime suicidal ideation and  
8  
9 74 self-harm is an important clinical marker for those at risk of later suicide.

10  
11  
12 75 Previous studies have demonstrated the association between suicidality, self-harm and  
13 76 EDs (14-17). Our previous study focusing on suicide attempts, demonstrated the cumulative  
14  
15 77 10-year incidence of suicide attempts in a population of patients with EDs as 6.8% (17).  
16  
17 78 Rates of self-harm have been reported as high as 42% for AN, up to 55% for bulimia nervosa  
18  
19 79 BN (18) and 26% for EDNOS (19). A recent meta-analysis summarised that 22% of patients  
20  
21 80 with AN and 33% of patients with BN reported lifetime self-harm (20).

22 81 Studies have reported mixed findings in terms of suicide attempts across ED  
23  
24 82 diagnostic categories (21-24), with many showing no difference in suicide attempts between  
25  
26 83 ED subtypes, some demonstrated higher rates of suicide attempts and self-harm in AN  
27  
28 84 compared to BN (17, 23, 25, 26) and others reported more frequent suicide attempts and  
29  
30 85 ideation in BN compared to AN (24, 27). Furthermore, binge eating disorder (BED), a  
31  
32 86 relatively new diagnostic category, has also been associated with increased suicidality (22).  
33  
34 87 In other studies, it appears that binge eating and purging are particularly associated with  
35  
36 88 increased risks of attempted suicide, due to their association with impulsivity (26, 28). Some  
37  
38 89 of these heterogenous findings have been attributed to differences in patient settings  
39  
40 90 (outpatient or inpatient) (21), diagnostic subtyping (e.g. restricting vs binge-purging AN) (28)  
41  
42 91 or the methods used for determining suicide attempts (26).

43  
44 92 Some studies have focused on risk factors for developing suicidal behaviour amongst  
45  
46 93 those with EDs. A number of risk factors have been identified, such as younger age of ED  
47  
48 94 onset, specific personality traits, comorbid disorders, negative life events and substance  
49  
50 95 misuse (17, 26, 29). However, there are limitations with a number of past studies in terms of  
51  
52 96 low numbers of suicidal behaviour within the study population, resulting in low power (5).  
53  
54 97 One possibility to improve this problem is to use longitudinal psychiatric case records, such  
55  
56 98 as electronic health records (EHRs). This captures a large enough population manifesting  
57  
58 99 suicidal behaviour, to ensure sufficient power (30).

59 100 The increasing use of EHRs in hospital care systems, alongside the growth of health  
60  
101 informatics allows us to develop computational tools that can analyse these large clinical  
102  
103 datasets (31). Natural language processing (NLP) tools allow us to determine information  
about symptomatology from information written in free-text EHRs (32). Previous research

[Type here]

1  
2  
3  
4 104 has shown that using NLP applications increases the positive predictive value of detecting  
5 105 patient-level suicidality (33). This is of particular use for suicidal behaviour, as both positive  
6  
7 106 and negated mentions of suicidality and self-harm are routinely reported within free text  
8  
9 107 during psychiatric assessments and follow-up (31, 34, 35).

10  
11 108 The aim of this study was to evaluate two NLP tools, one that identifies mentions of  
12 109 self-harm (36), and the other that identifies suicidality (35) for a cohort of ED patients. To  
13  
14 110 achieve this, we compared the performance of the NLP tools against a gold-standard set of  
15 111 manually annotated documents, using previously defined coding rules. We then used the tools  
16  
17 112 to identify positive mentions of either self-harm or suicidality on a patient level, to evaluate  
18  
19 113 the incidence of self-harm and suicidality in patients diagnosed with eating disorders over a  
20  
21 114 12-year period.

22 115

## 23 116 **Methods**

24 117

### 25 118 **Study Design and Setting**

26  
27  
28 119 This study is a retrospective cohort study using data obtained from South London and  
29 120 Maudsley National Health Service Foundation trust (SLaM). This is a mental health service  
30  
31 121 serving an estimated population of 2 million residents of southeast London. Patients come  
32  
33 122 from the London boroughs of Croydon, Southwark, Lambeth, Lewisham, Bromley, Bexley  
34  
35 123 and Greenwich. SLaM has had fully electronic records since 2006 and the National Institute  
36  
37 124 for Health Research funded Biomedical Research Centre supports the infrastructure for  
38  
39 125 rendering its anonymised records available for research. We analysed the data as ‘event  
40  
41 126 notes’ in the electronic health records (EHRs), irrespective whether they were created during  
42  
43 127 an inpatient stay, during follow-up or a telephone appointment.

44 128

### 45 129 **Patient and public involvement**

46 130 No patient involved.

47 131

### 48 132 **Inclusion criteria and exposures**

49  
50  
51 133 The analysed cohort was extracted via the Clinical Record Interactive Search (CRIS)  
52 134 system (37) and comprised of individuals who received an International Classification of  
53  
54 135 Diseases, 10<sup>th</sup> Revision (ICD-10) (38) diagnosis of an ED (F50.0-F50.9) within the 12-year  
55  
56 136 observation period of 1 January 2007 to 31 September 2019. These patients were identified  
57  
58 137 using two data sources available within the EHRs. First, structured information on diagnosis  
59  
60

[Type here]

1  
2  
3  
4 138 from drop down fields in the source record. Second, structured variables which are routinely  
5 139 extracted from open text fields using a bespoke algorithm generated by the Generalised  
6  
7 140 Architecture for Text Engineering (GATE) software (39). The comorbidity exposures of  
8  
9 141 interest were diagnoses of substance misuse (F10-F19), bipolar disorder (F31), anxiety  
10 142 disorders, depression (F32 and F33) and personality disorder (F60) determined by structured  
11 143 information on the EHRs in the drop-down fields in the source record.  
12  
13  
14 144  
15 145  
16

### 17 146 **Primary outcomes**

18  
19 147 The outcomes of interest were a patient reporting at least one positive mention of self-  
20 148 harm or one positive mention of suicidality. Information on these outcomes was extracted  
21 149 using NLP applications that have been previously developed and used within similar datasets  
22 150 (31, 34, 35). The first application used rule-based linguistic processing to identify positive  
23 151 mentions of self-harm (SH) in clinical texts, this included historic and current episodes, but  
24 152 did not include self-harm ideation. The second application, also rule-based and using lexical  
25 153 resources, included suicidal ideation (SUI) of both a passive and active nature; both of these  
26 154 were recorded as a binary outcome. A detailed description of the development and evaluation  
27 155 of both NLP tools used to identify mentions of self-harm and suicidality are described in  
28  
29 153 previous studies (35, 36, 40).  
30  
31  
32  
33  
34 156  
35  
36  
37 158  
38 159  
39

### 40 160 **Workflow for validating the NLP tools**

41 161 **Figure 1** shows the workflow for validating the NLP tools to determine the primary  
42 162 outcomes. All F50 diagnoses between 1<sup>st</sup> Jan 2007 and 31<sup>st</sup> March 2019 were included in the  
43 163 validation; this period of time was 6 months shorter than the final analysis due to the lag time  
44 164 between the validation and final statistical analysis. In total, 7,188 patients met the inclusion  
45 165 criteria, of which 6,972 had at least one EHR document available. Overall, **1,054,640**  
46 166 documents were available for these patients. For all 6,972 patients, the NLP tools were used  
47 167 to search for mentions of both suicidality and self-harm. In total, 5,456 patients had positive  
48 168 mentions of either SH or SUI, 4741 had any mention of SH, 4528 had any mention of SUI,  
49 169 and 3813 patients had both SH and SUI mentioned. Manual annotations were compared to  
50 170 the NLP tool annotations and attribute agreements were calculated (41).  
51  
52  
53  
54  
55  
56  
57

58 171 From these patients, a sample of documents was randomly extracted. This was  
59 172 achieved by firstly restricting the patients to those who had a number of EHR documents

[Type here]

1  
2  
3  
4 173 within the 1<sup>st</sup> and 3<sup>rd</sup> quartiles, to eliminate outliers with very few documents or with  
5 174 excessive documentation. This resulted in 2923 patients in total with positive mentions of  
6  
7 175 either SH or SUI (135,317 documents), 2431 patients with a positive mention of SH (114,962  
8  
9 176 documents), 2294 patients with a positive mention of SUI (110,399 documents), and 1802  
10 177 patients with a positive mention of both SH and SUI (90,044 documents). Each patient had a  
11  
12 178 minimum of 17 documents and maximum of 99 documents.

13  
14 179 A randomised sample of 500 documents was taken for manual review: 100 with a  
15 180 positive mention of suicidality only, 100 with a positive mention of self-harm only, 100 with  
16 181 a mention of both self-harm and suicidality and 200 with no mention of either. Three manual  
17 182 coders, including one clinically trained psychiatrist (CC, AS, AV), were assigned either  
18 183 suicidality (AS, 400 documents), self-harm (AV, 400 documents) or both (CC, 500  
19 184 documents) for review. The sets were independently classified with 300 of them crossing  
20 185 over and classified by all three authors.

21 186 For the suicidality documents, two coders (CC and AS) independently labelled each  
22 187 document as suicidal, non-suicidal or uncertain. Inter-rater agreement was measured using  
23 188 Cohen's Kappa and the F1 statistic on a document level to determine interrater reliability  
24 189 (41). Any discrepancies were discussed and clarified to develop a 'gold standard' set of  
25 190 documents. The same principle was applied to mentions of self-harm within the documents,  
26 191 determined by two coders (CC, AV). Any mention of self-harm within the document was  
27 192 coded as positive, negative and whether relevant or non-relevant, for example a positive code  
28 193 refers to the note referring to an act of self-harm by the individual, negative refers to a denial  
29 194 or negated act of self-harm. If the mention was about a friend or family member that was not  
30 195 relevant to the patient non-relevant was coded. (see Figure 1).

### 31 196 32 197 **Testing the Algorithms**

33 198 The performance of each NLP tool was tested by comparing the output of the  
34 199 application against the 'gold standard' set of manual annotations and calculating precision  
35 200 (positive predictive value; PPV) and recall (sensitivity) statistics. Good inter-rater agreement  
36 201 between the NLP output and gold-standard was indicated by a Cohen's kappa of 0.80 for  
37 202 identifying both suicidality and self-harm. Scores > 0.80 demonstrate a 'strong' level of  
38 203 agreement and reliable data, scores > 0.90 are 'almost perfect' agreement and scores > 0.60  
39 204 were considered 'moderate' in agreement (41).

40 205  
41 206  
42  
43  
44  
45  
46  
47  
48  
49  
50  
51  
52  
53  
54  
55  
56  
57  
58  
59  
60

[Type here]

## 207 **Figure 1: Workflow for validation of both NLP tools**

208

209

210

### 211 **Covariates**

212 The year and month of birth, gender, ethnicity, deprivation score and marital status were  
213 retrieved from the CRIS database. Age in years was calculated from the individual's first  
214 eating disorder diagnosis in the observation window or from January 2007 if the diagnosis  
215 preceded the observation period. We used the 'multiple deprivation score' which is a small-  
216 area-level measure of socioeconomic status, based on the individual's address closest to the  
217 diagnosis of the eating disorder in the observation window, covering seven components:  
218 employment, income, education, health, barriers to housing and services, crime and the living  
219 environment with specific weightings. The index of multiple deprivation is a well-established  
220 measure that has been widely used as a regional indicator for socioeconomic status in  
221 previous studies; the scores are transformed into percentiles (1-100) with higher scores  
222 indicating greater deprivation. The deprivation score was grouped into tertiles (33<sup>rd</sup>  
223 percentiles) and converted into a categorical variable. Previous studies have used this method  
224 of categorical definition using the same data source (2).

225

### 226 **Statistical analysis**

227 Analysis was completed using Stata software. All patients were eligible for analysis.  
228 Descriptive statistics were used to characterise the patients. Logistic regression was used to  
229 calculate odd ratios with 95% confidence intervals with self-harm or suicidality as the  
230 'outcome' and the comorbid psychiatric diagnoses as exposure. ED diagnoses were  
231 categorised into AN (both restricting and purging types), BN, and all other F50 diagnoses.  
232 For those with multiple diagnoses, a diagnostic hierarchy of AN>BN>other was used. The  
233 observation period started from the first date of diagnosis or 1 Jan 2007 if the diagnosis was  
234 made prior to this date and the ended on the 31 September 2019. Univariate logistic  
235 regression was used to estimate the effect of the primary ED diagnosis, demographic  
236 characteristics and psychiatric comorbidities on each of the outcomes of interest (SH and  
237 SUI). Next, multivariable analyses were performed to calculate the adjusted odds ratio (OR)  
238 and 95% confidence interval (CI) for each comorbid psychiatric diagnosis, whilst controlling  
239 for demographics and the ED diagnosis. the effect of the psychiatric comorbidities and  
240 demographics.

241

[Type here]

1  
2  
3  
4 242 **Ethical Approval**

5 243 The CRIS database has received ethical approval for secondary analysis: Oxford REC  
6 244 C, reference 18/SC/0372.  
7 245  
8 246  
9  
10 247  
11 248

12  
13 249 **Results**

14 250  
15  
16 251 **Descriptive Statistics**

17 252 Table 1 summarises the different types of ED diagnosis by age. The mean age was  
18 253 26.0 (SD 11; range 10-90)  
19  
20 254

21  
22  
23 255 **Table 1: Summary of all diagnoses by age group** (11 patients had no detailed information  
24 256 about the diagnosis other than 'F50')  
25  
26 257

| Age group<br>Years,<br>(n)% total                             | AN              | BN                 | EDNOS           |
|---------------------------------------------------------------|-----------------|--------------------|-----------------|
| <10 (39) <1%                                                  | 4 (<1%)         | 0                  | 35 (1.1%)       |
| 10-19 (2572)<br>34.6%                                         | 1250<br>(49.0%) | 320<br>(20.4<br>%) | 1002<br>(30.4%) |
| 20-29 (2720)<br>36.6%                                         | 807<br>(31.6%)  | 714<br>(45.4<br>%) | 1199<br>(36.4%) |
| 30-39 (1233)<br>16.6%                                         | 276<br>(10.8%)  | 354<br>(22.5<br>%) | 603<br>(18.3%)  |
| 40-49 (527)<br>7.10%                                          | 118<br>(4.62%)  | 122<br>(7.76<br>%) | 287<br>(8.70%)  |
| 50+ (332)<br>4.47%                                            | 98<br>(3.84%)   | 62<br>(3.94<br>%)  | 172<br>(5.22%)  |
| <b>TOTAL</b><br>n= 7423 (11<br>missing detailed<br>diagnosis) | <b>2553</b>     | <b>1572</b>        | <b>3298</b>     |

27  
28  
29  
30  
31  
32  
33  
34  
35  
36  
37  
38  
39  
40  
41  
42  
43  
44  
45  
46  
47  
48  
49  
50  
51  
52  
53  
54  
55  
56 258

57 259

58 260

59 261

[Type here]



262

263

264 **Self-harm and Suicidality amongst patients**

265

266

267

268

269

270

271

272

273

274

275

276

277

278

279

280

The attribute agreements for the final corpus of documents on self-harm and suicidality are displayed below in Table 2. The three attributes include ‘positive’ ie there is a mention of either self-harm or suicidality, ‘negative or non’ ie there is a denial of self-harm or suicidality and ‘relevant’ i.e. the mention is relevant to the patient and not a family member or friend. A summary of those reporting self-harm or suicidality by age are displayed in Table 3.

**Table 2 ; Attribute agreements:** attribute agreements reflect the comparison of the NLP tool output to the gold standard set of manually annotated documents. Annotations are document-level for suicidality and mention-level for self-harm. The results from the study that developed and evaluated the suicidality tool reported 0.58-0.72 precision, 0.70-0.87 for recall and 0.69-0.75 F1-score (35) and the results from the study that developed and evaluated the self-harm tool reported 0.88-0.96 precision, 0.88-0.96 recall and 0.88-0.96 F1 score (40).

|                                | Positive document for suicidality | Non-relevant document for suicidality | Non-suicidal documents | Positive mention of self-harm | Relevant mention of self-harm | Negative mention of self-harm |
|--------------------------------|-----------------------------------|---------------------------------------|------------------------|-------------------------------|-------------------------------|-------------------------------|
| Precision                      | 0.80                              | 0.98                                  | 0.58                   | 0.96                          | 0.89                          | 0.59                          |
| Recall                         | 0.82                              | 0.92                                  | 0.87                   | 0.91                          | 0.72                          | 0.79                          |
| F1-score                       | 0.81                              | 0.95                                  | 0.70                   | 0.94 (                        | 0.80                          | 0.68                          |
| Number of documents / mentions | 114                               | 106                                   | 55                     | 528                           | 385                           | 86                            |

281

[Type here]

1  
2  
3  
4 282  
5 283  
6  
7 284  
8  
9 285  
10  
11 286

**Table 3: Self harm and suicidality reported amongst patients by age**

| Age group, years | Self- harm present during follow up period, n (%) | Suicidality present, n (%) |
|------------------|---------------------------------------------------|----------------------------|
| <10              | 16 (<1%)                                          | 15 (<1%)                   |
| 10-19            | 1914 (41.7%)                                      | 1928 (40.5%)               |
| 20-29            | 1489 (32.4%)                                      | 1553 (32.6%)               |
| 30-39            | 675 (14.7%)                                       | 722 (15.2%)                |
| 40-49            | 310 (6.75%)                                       | 168 (6.75%)                |
| 50+              | 187 (4.1%)                                        | 134 (5.38%)                |
| <b>TOTAL</b>     | <b>4591</b>                                       | <b>4520</b>                |

34  
35 287  
36  
37 288  
38 289  
39  
40 290  
41  
42 291  
43 292  
44  
45 293  
46  
47 294  
48 295  
49  
50 296  
51 297  
52 298  
53 299  
54 300  
55 301  
56 302

**Self-harm-reported amongst patients with eating disorders**

Patients who reported self-harm (past or present) were more likely to be younger in age (OR = 0.98, 95% CI 0.97-0.98; P<0.001), less likely to be female (OR = 0.67, 95% CI 0.58-0.79; P<0.001) more likely to be of white ethnicity (OR = 1.40, 95% CI 1.10-1.78; p=0.006), and more likely to have a diagnosis of AN (OR = 3.44, 95% CI 1.05-11.3; p=0.04). They were also more likely to have a comorbid diagnosis; in particular a diagnosis of borderline personality disorder (BPD; OR = 54.2, 95% CI 24.2-121.4; p<0.001), bipolar disorder (OR = 9.57, 95% CI 5.57-15.4; p<0.001) and substance misuse (OR =7.22 , 95% CI 2.94- 18.3; p<0.001); as displayed in Table 4.

**Table 4: Univariable logistic regression to determine the effect of demographics, primary ED diagnosis, and psychiatric comorbidities on risk of self-harm**

| Variables | Number (%)<br>Age=Mean<br>+/- SD | Self harm<br>n (% of<br>group) | Unadjusted Odds Ratio | P value |
|-----------|----------------------------------|--------------------------------|-----------------------|---------|
|-----------|----------------------------------|--------------------------------|-----------------------|---------|

[Type here]

|                             |                  |                  |                   |         |
|-----------------------------|------------------|------------------|-------------------|---------|
| <b>Age (years)</b>          | 26.0 (11.0)      | 4591             | 0.98 (0.97-0.98)  | <0.001  |
| <b>Gender</b>               | 6635             | 4252             | ref               |         |
| Female                      | (91.5%)          | (58.6%)          |                   |         |
| Male                        | 613 (8.5%)       | 334 (4.6%)       | 0.67 (0.58-0.79)  | <0.001  |
| <b>Marital Status</b>       |                  |                  |                   |         |
| Single                      | 5081<br>(70.1%)  | 3,341<br>(46.0%) | ref               |         |
| Married/partner             | 724 (9.98%)      | 429<br>(5.91%)   | 0.76 (0.65 -0.89) | P=0.001 |
| Separate/divorced/widow     | 200 (2.76%)      | 122<br>(1.68%)   | 0.81 (0.61-1.1)   | P=0.17  |
| Not known                   | 1248<br>(17.7%)  | 699<br>(9.64%)   | n/a               | n/a     |
| <b>Ethnicity</b>            |                  |                  |                   |         |
| White                       | 6,008<br>(84.5%) | 3752<br>(53.8%)  | 1.40 (1.10-1.78)  | 0.006   |
| Black                       | 344 (4.84%)      | 239<br>(3.50%)   | 1.26 (0.94-1.68)  | 0.12    |
| South Asian                 | 219 (3.1%)       | 149<br>(2.17%)   | 1.06 (0.86-.1.30) | 0.59    |
| Mixed and other             | 428 (6.0%)       | 273<br>(3.97%)   | 0.81 (0.53-1.25)  | 0.34    |
| Unknown                     | 115 (1.6%)       | 51 (<1%)         | n/a               | n/a     |
| <b>Deprivation Score</b>    |                  |                  |                   |         |
| Group 1                     | 2001<br>(26.9%)  | 1240<br>(27.0%)  | ref               |         |
| Group 2                     | 2897<br>(39.0%)  | 1778<br>(38.7%)  | 0.88 (0.83-1.11)  | 0.83    |
| Group 3                     | 2514<br>(33.8%)  | 1559<br>(34.0%)  | 1.00 (0.88-1.13)  | 0.99    |
| Not known                   | 22 (<1%)         | 14 (<1%)         | 1.34 (0.52-3.51)  | 0.54    |
| <b>Primary ED diagnosis</b> |                  |                  |                   |         |
| AN                          | 2553<br>(34.4%)  | 1876<br>(40.9%)  | 3.44 (1.05-11.3)  | 0.04    |
| BN                          | 1572<br>(21.2%)  | 973<br>(21.2%)   | 2.28 (0.69-7.52)  | 0.17    |
| EDNOS                       | 3298<br>(44.4%)  | 1737<br>(37.8%)  | 1.40 (0.43-4.59)  | 0.55    |
| Unknown/other?              | 181 (2%)         | 5 (<1%)          | n/a               | n/a     |
| <b>All substance misuse</b> |                  |                  |                   |         |
| None                        | 2644<br>(99.3%)  | 4398<br>(95.8%)  | ref               |         |
| Alcohol                     | 13 (<1%)         | 132<br>(2.89%)   | 6.10 (3.44-10.8)  | <0.001  |
| Substance misuse            | 5 (<1%)          | 61 (1.33%)       | 7.22 (2.94- 18.3) | <0.001  |
| <b>Depression</b>           |                  |                  |                   |         |
| No                          | 2532<br>(95.1%)  | 3777<br>(82.3%)  | ref               |         |

[Type here]

|                                        |              |              |                   |        |
|----------------------------------------|--------------|--------------|-------------------|--------|
| Yes                                    | 130 (4.89%)  | 814 (17.7%)  | 4.20 (3.46-5.01)  | <0.001 |
| <b>Anxiety disorders</b>               |              |              |                   |        |
| No                                     | 2642 (99.3%) | 4503 (98.1%) | ref               |        |
| Yes                                    | 20 (<1%)     | 88 (1.92%)   | 2.58 (1.58-4.21)  | <0.001 |
| <b>Borderline Personality Disorder</b> |              |              |                   |        |
| No                                     | 2656 (99.8%) | 4090 (89.1%) | ref               |        |
| Yes                                    | 6 (<1%)      | 501 (10.9%)  | 54.2 (24.2-121.4) | <0.001 |
| <b>Other Personality Disorder</b>      |              |              |                   |        |
| No                                     | 2649 (99.5%) | 3939 (85.8%) | ref               |        |
| Yes                                    | 13 (<1%)     | 652 (14.2%)  | 33.7 (19.4-58.5)  | <0.001 |
| <b>Bipolar Disorder</b>                |              |              |                   |        |
| No                                     | 2648 (99.5%) | 4370 (95.2%) | ref               |        |
| Yes                                    | 14 (<1%)     | 221 (4.81%)  | 9.57 (5.57-15.4)  | <0.001 |

303

304 **Suicidality reported amongst patients with eating disorders**

305

306 Patients who reported suicidality were more likely to be younger (OR = 0.98, 95% CI 0.97-  
 307 0.99; p<0.001), of white ethnicity (OR=1.59, 95% CI 1.23-2.10; p<0.001), less likely to be  
 308 married or with a partner (OR=0.76, 95% CI 0.65-0.90; p=0.001 and have a diagnosis of AN  
 309 (OR=8.20, 95% CI 2.17-30.1; p=0.002). They were also more likely to have a comorbid  
 310 diagnosis, in particular BPD (OR = 26.2, 14.4-47.7; p<0.001), bipolar disorder (OR = 9.31,  
 311 95% CI 5.31-16.3; P<0.001) and alcohol misuse (OR = 6.59, 95% CI 3.56-12.2; p<0.001), as  
 312 seen in Table 5.

313

314 **Table 5: Univariable logistic regression to determine the effect of demographics,**  
 315 **primary ED diagnosis, and psychiatric comorbidities on risk of suicidality**

316

| Variables             | Number (%)<br>Age=Mean<br>+/- SD | Suicidality n<br>(% of<br>group) | Unadjusted Odds Ratio | P value |
|-----------------------|----------------------------------|----------------------------------|-----------------------|---------|
| <b>Age (years)</b>    | 26.1 (11.0)                      |                                  | 0.98 (0.97-0.99)      | <0.001  |
| <b>Gender %</b>       | 6635                             | 4364 (65.8%)                     | ref                   |         |
| Female                | (91.5%)                          |                                  |                       |         |
| Male                  | 613 (8.5%)                       | 395 (64.4%)                      | 0.94 (0.79-1.12)      |         |
| <b>Marital Status</b> |                                  |                                  |                       |         |

[Type here]

|                                        |                  |              |                   |         |
|----------------------------------------|------------------|--------------|-------------------|---------|
| Single                                 | 5081<br>(70.1%)  | 3476 (72.3%) | ref               |         |
| Married/partner                        | 724 (9.98%)      | 451 (9.47%)  | 0.76 (0.65 -0.90) | P=0.001 |
| Separate/divorced/widow                | 200 (2.76%)      | 131 (2.75%)  | 0.88 (0.65-1.18)  | P=0.39  |
| Not known                              | 1248<br>(17.7%)  | 706 (14.8%)  | n/a               | n/a     |
| <b>Ethnicity</b>                       |                  |              |                   |         |
| White                                  | 6,008<br>(84.5%) | 3907 (84.3%) | 1.59 (1.23-2.10)  | <0.001  |
| Black                                  | 344 (4.84%)      | 255 (5.5%)   | 1.03 (0.77-1.37)  | 0.84    |
| South Asian                            | 219 (3.1%)       | 145 (3.13%)  | 0.97 (0.79-1.20)  | 0.80    |
| Mixed and other                        | 428 (6.0%)       | 276 (5.95%)  | 0.76 (0.49-1.17)  | 0.21    |
| Unknown                                | 115 (1.6%)       | 52 (1.12%)   | n/a               | n/a     |
| <b>Deprivation Score</b>               |                  |              |                   |         |
| Group 1                                | 2001<br>(26.9%)  | 1300 (27.3%) | ref               |         |
| Group 2                                | 2897<br>(39.0%)  | 1829 (38.9%) | 0.93 (0.83-1.06)  | 0.27    |
| Group 3                                | 2514<br>(33.8%)  | 1623 (34.1%) | 0.98 (0.86-1.11)  | 0.75    |
| Not known                              | 22 (<1%)         | 12 (<1%)     | 0.76 (0.31-1.87)  | 0.54    |
| <b>Presence of eating Disorder</b>     |                  |              |                   |         |
| AN                                     | 2553<br>(34.4%)  | 1909 (75.5%) | 8.20 (2.17-30.1)  | 0.002   |
| BN                                     | 1572<br>(21.2%)  | 1005 (67.7%) | 4.49 (1.48-21.2)  | 0.01    |
| EDNOS                                  | 3298<br>(44.4%)  | 1847 (57.2%) | 3.57 (0.94-13.47) | 0.06    |
| unknown                                | 11 (<1%)         | 3 (<1%)      | n/a               | n/a     |
| <b>All substance misuse</b>            |                  |              |                   |         |
| None                                   | 2472<br>(99.3%)  | 4570 (95.9%) | ref               |         |
| Alcohol                                | 11 (<1%)         | 134 (2.81%)  | 6.59 (3.56-12.2)  | <0.001  |
| Substance misuse                       | 6 (<1%)          | 60 (1.26%)   | 5.41 (2.33-12.5)  | <0.001  |
| <b>Depression</b>                      |                  |              |                   |         |
| No                                     | 2383<br>(95.7%)  | 3926 (82.4%) | ref               |         |
| Yes                                    | 106 (4.26%)      | 838 (17.6%)  | 4.80 (3.90-5.91)  | <0.001  |
| <b>Borderline Personality Disorder</b> |                  |              |                   |         |
| No                                     | 2478<br>(99.6%)  | 4268 (89.6%) | ref               |         |
| Yes                                    | 11 (<1%)         | 496 (10.4%)  | 26.2 (14.4-47.7)  | <0.001  |
| <b>Bipolar Disorder</b>                |                  |              |                   |         |
| No                                     | 2476<br>(99.5%)  | 4542 (95.3%) | ref               |         |
| Yes                                    | 13 (<1%)         | 222 (4.67%)  | 9.31 (5.31-16.3)  | <0.001  |
| <b>Anxiety</b>                         |                  |              |                   |         |

[Type here]

|                                   |                 |              |                   |        |
|-----------------------------------|-----------------|--------------|-------------------|--------|
| No                                | 2476<br>(99.5%) | 4669 (98.0%) | ref               |        |
| Yes                               | 13 (<1%)        | 95 (2.0%)    | 3.88 (2.17-6.93)  | <0.001 |
| <b>Other Personality Disorder</b> |                 |              |                   |        |
| No                                | 2472<br>(99.3%) | 4116 (86.4%) | ref               |        |
| Yes                               | 17 (<1%)        | 648 (13.6%)  | 22.9 (14.1 -37.1) | <0.001 |

317

318

### 319 **Multivariable analysis of the effect of comorbid psychiatric diagnoses on self-harm and** 320 **suicidality**

321

322 When adjusting for demographics and the primary ED diagnosis, depression, bipolar  
323 disorder, other PD, substance misuse and alcohol use disorder remained significantly  
324 associated with suicidal behaviour. However, after adjusting for the demographics BPD  
325 remained only associated with self-harm (OR 2.84, 0.84-9.68, p=0.09) and not with  
326 suicidality (OR =1.52, 0.51-4.50, p=0.45). Anxiety disorders remained associated with  
327 suicidality (OR =1.93, 95% CI 1.01-3.69, p=0.05) but not self-harm (OR =1.47, 95% CI 0.81-  
328 2.65, p=0.20 as shown in Table 6 (i) and (ii)).

329

330

### 331 **Table 6 (i) Multivariable logistic regression examining the association between psychiatric** 332 **comorbidities and self-harm;** adjusted for demographics & ED diagnosis

333

| Comorbid diagnosis              | Adjusted Odds Ratio (95% CI) | P Value |
|---------------------------------|------------------------------|---------|
| Borderline Personality Disorder | 2.84 (0.84-9.64)             | 0.09    |
| Anxiety disorders               | 1.47 (0.81-2.65)             | 0.20    |
| Depression                      | 3.38 (2.72-4.21)             | <0.001  |
| Bipolar disorder                | 5.49 (2.97-10.2)             | <0.001  |
| Other PD                        | 13.3 (5.72-30.8)             | <0.001  |
| Alcohol                         | 5.26 (2.67-10.3)             | <0.001  |
| Substance misuse                | 4.35 (1.65-11.5)             | 0.003   |

334

### 335 **Table 6 (ii) Multivariable logistic regression examining the association between psychiatric** 336 **comorbidities and suicidality;** adjusted for demographics & ED diagnosis

337

[Type here]

338

| Comorbid diagnosis              | Adjusted Odds Ratio (95% CI) | P Value |
|---------------------------------|------------------------------|---------|
| Borderline Personality Disorder | 1.52 (0.51-4.50)             | 0.45    |
| Anxiety disorders               | 1.93 (1.01-3.69)             | 0.05    |
| Depression                      | 3.62 (2.87-4.57)             | <0.001  |
| Bipolar disorder                | 5.07 (2.69-9.56)             | <0.001  |
| Other PD                        | 11.6 (4.94-26.5)             | <0.001  |
| Alcohol use disorder            | 5.75 (2.73-12.1)             | <0.001  |
| Substance misuse                | 2.84 (1.16-6.98)             | 0.02    |

339

340

341

342

343

344

## Discussion

345

### Accuracy of the NLP output

346

347

348

349

350

351

352

353

354

355

356

357

358

359

360

361

362

363

364

365

366

367

368

369

370

371

372

373

374

375

[Type here]

1  
2  
3  
4 364 patients with comorbidities are more likely to self-harm and attempt suicide (43, 44).  
5 365 However, studies have demonstrated that even when adjusted for comorbid disorders, the risk  
6  
7 366 of suicidal behaviour remains higher in patients with EDs than in the general population and  
8  
9 367 comorbid disorders just elevate that risk further (17, 42, 45).

10 368 In our study, psychiatric comorbidity was associated with increased suicidal  
11  
12 369 behaviour. In particular, BPD was associated with highly elevated odds of self-harm and  
13  
14 370 suicidality, prior to adjustment. When adjusted, BPD increased the odds of self-harm, but  
15  
16 371 interestingly not suicidality; although this adjusted association could reflect a lack of  
17  
18 372 statistical power, as the cell size was small and CIs wide. This is consistent with previous  
19  
20 373 studies as BPD presents with emotional dysregulation and impulsivity; associated with self-  
21  
22 374 harm and ED symptoms such as bingeing or purging (18, 46). Furthermore, psychotherapies  
23  
24 375 aimed at supporting those diagnosed with BPD and self-harm have been shown to be  
25  
26 376 effective at also supporting patients with a diagnosis of ED (47, 48).

27 377 Similarly, those with a diagnosis of alcohol or substance misuse had an elevated odds  
28  
29 378 of reporting self-harm and suicidality. Substance and alcohol misuse are associated with  
30  
31 379 impulsivity; impulsivity is associated with behaviours such as bingeing and purging and  
32  
33 380 suicidal behaviour (49-51) which has been shown to increase risk of completed suicide (52,  
34  
35 381 53). Bipolar Disorder was also significantly associated with a five-fold increase in odds of  
36  
37 382 suicidal behaviour when adjusted for demographics and the primary ED diagnosis. This is  
38  
39 383 consistent with previous studies demonstrating an increased risk of hospitalised suicide  
40  
41 384 attempts in ED patients with bipolar disorder compared to those without (17).

42 385 Relative to BN and other EDs, AN presented with the highest risk of suicidal  
43  
44 386 behaviour, particularly suicidality. This is consistent with previous studies reporting a higher  
45  
46 387 prevalence of suicide attempts and completed suicide in individuals with AN compared to  
47  
48 388 those with BN or other EDs (5, 17, 23). However, it is important to consider the number of  
49  
50 389 studies reporting suicidal behaviour most prevalent in BN (24, 51, 54). One explanation for  
51  
52 390 the difference between our results and the above findings is that the current study used a  
53  
54 391 diagnostic hierarchy of AN>BN>EDNOS to assign a primary ED diagnosis to patients; we  
55  
56 392 know there is a well-established diagnostic crossover between EDs, with 50% of patients  
57  
58 393 initially being diagnosed with AN being re-diagnosed with BN or AN-binge purge subtype  
59  
60 394 (55). Evidence also indicates that individuals experiencing diagnostic cross-over may be at  
61  
62 395 particularly elevated risk of suicidality (56). Therefore, there could be a subtype of particular  
63  
64 396 interest; future investigations should focus on diagnostic flux and whether the suicidal  
65  
66 397 behaviour risk correlates to fluctuating ED symptoms (26).

67 398 This study highlights the importance of further understanding the shared mechanisms  
68  
69 399 for suicidal behaviour and ED diagnosis. There are various explanations that have been  
70  
71 400 hypothesised for the high risk of self-harm and suicidality; some studies have suggested there  
72  
73 401 are shared genetic factors predisposing to both conditions (57, 58). Others suggest that  
74  
75 402 emotional dysregulation is associated with EDs and others demonstrate that adjusting for  
76  
77 403 comorbid psychiatric disorders weakens any association (22, 57, 58). Increased pain tolerance  
78  
79 404 and fearlessness for death are other hypotheses for the increased risk amongst patients

[Type here]



1  
2  
3  
4 405 diagnosed with EDs (59). The interpersonal theory of suicide describes that a higher lethality  
5 406 attempt requires both a desire for death and capability for suicide; capability of suicide has  
6  
7 407 been theorised as developing after gradual chronic exposure to painful ED behaviours and  
8  
9 408 habituation to fear and pain (60, 61). Therefore, extreme restrictive eating may differentiate  
10 409 AN from other EDs, increasing the capability of both self-harm and suicidality (61).

11 410

### 12 411 **Strengths and limitations**

13 412

14 413 The main strengths of this study are the size of the cohort (>7400), the longitudinal  
15 414 study design and long period of time for follow up (12.5 years), facilitated by the use of the  
16 415 CRIS database. There is currently a limited body of research on correlates and risk factors for  
17 416 suicidal behaviour amongst ED patients and previous studies have small numbers and a high  
18 417 usage of cross-sectional studies as well as studies at risk of reporting bias (26). The NLP  
19 418 approach used to extract clinician documentation of self-harm and suicidality from narrative  
20 419 text in EHRs reduces the risk of reporting bias and allows access to detailed clinical  
21 420 information that would not be available from EHR structured fields (30, 35).

22 421 The main limitation of this study is that the tools were not able to consider the timing  
23 422 of reported suicidality or self-harm relative to the ED diagnosis. Therefore, it is possible the  
24 423 reported suicidal behaviour was prior to ED diagnosis; an improvement of the NLP tool  
25 424 would be to include temporality to understand specific time periods of risk for self-harm or  
26 425 reported suicidality. Another consideration is that due to changing diagnostic codes between  
27 426 the follow up period of 2007-2020 and the introduction of the ICD-11 codes of binge eating  
28 427 disorder, we had to include all EDs aside from AN and BN into one heterogenous group of  
29 428 diagnoses 'Other EDs'. This was needed to ensure consistency over the time period and to  
30 429 avoid the problem of small group sizes in the regression analysis. Furthermore, given that  
31 430 EHRs include routine clinical data not primarily collected for research purposes, the study  
32 431 relies on clinician documentation which could include non-grammatical errors, jargon and  
33 432 idiosyncratic abbreviations; all of these could increase the chance of NLP misclassification  
34 433 (35). However, this was mitigated by using all documents available for each patient.

35 434 Therefore, there were multiple opportunities to capture suicidality information to compensate  
36 435 for lack of sensitivity of the tool. Finally, the data relies on recording of suicidality and self-  
37 436 harm following a clinical encounter. This is likely to result in some heterogeneity at a  
38 437 document level, as some healthcare professionals may be more likely to discuss or record  
39 438 self-harm or suicidal thoughts depending on their level of experience, clinical background or

40  
41  
42  
43  
44  
45  
46  
47  
48  
49  
50  
51  
52  
53  
54  
55  
56  
57  
58  
59  
60  
[Type here]

1  
2  
3  
4 439 their prior knowledge of the patient. However as there only needed to be one positive  
5 440 mention of self-harm or one positive mention of suicidality, at a patient level, the threshold  
6  
7 441 was low for detection of either outcome.  
8  
9 442

### 10 443 **Clinical and research implications**

11 444 This study highlights the importance of risk assessment screening in all patients  
12  
13 445 diagnosed with EDs, with a particular emphasis on those diagnosed with AN and ED patients  
14  
15 446 with comorbid psychiatric diagnoses. This study also highlights the potential use of EHR  
16  
17 447 databases to further suicidality and self-harm research by utilising NLP techniques. These  
18  
19 448 tools could potentially have use with further development in risk prediction within ED  
20  
21 449 services; their use along clinician reported decisions could help predict future suicidal  
22  
23 450 behaviour in ED patients (13, 30).  
24

25 451  
26 452 **Funding statement:** This research did not receive a specific grant, but the primary researcher  
27  
28 453 CC was supported by an NIHR Academic Clinical Fellowship training post and with support  
29  
30 454 from the Biomedical Research Centre at the IoPPN.

31 455 **Competing interests:** nil

32 456 **Data Availability:** The data is made available under specific governance requirements:  
33  
34 457 researchers need to have a contract with the South London and Maudsley NHS Trust, which  
35  
36 458 can be applied for relevant research studies. Each research project is reviewed by a service-  
37  
38 459 user led oversight committee of the National Institute of Health Research Biomedical  
39  
40 460 Research Centre. On request, and after appropriate arrangements, the data and modelling  
41  
42 461 employed in this study can be viewed within the secure system firewall

43 462 **Contribution:** Author's contribution: CC led the project, conducted the data analysis and  
44  
45 463 wrote the final manuscript; RD supported with the title, analysis and final manuscript. US  
46  
47 464 contributed with the final manuscript and topic expertise. AB, SV and HS conducted data  
48  
49 465 extraction and analysis. AS and KV conducted data analysis and support with final  
50  
51 466 manuscript.

### 52 467 **References**

- 53 470  
54 471 1. Himmerich H, Hotopf M, Shetty H, Schmidt U, Treasure J, Hayes RD, et al.  
55 472 Psychiatric comorbidity as a risk factor for the mortality of people with bulimia nervosa. *Soc*  
56 473 *Psychiatry Psychiatr Epidemiol.* 2019b;54(7):813-21.  
57 474 2. Himmerich H, Hotopf M, Shetty H, Schmidt U, Treasure J, Hayes RD, et al.  
58 475 Psychiatric comorbidity as a risk factor for mortality in people with anorexia nervosa.  
59 476 *European Archives of Psychiatry and Clinical Neuroscience.* 2019a;269(3):351-9.  
60

[Type here]

- 1  
2  
3 476 3. Nielsen S. EPIDEMIOLOGY AND MORTALITY OF EATING DISORDERS.  
4 477 Psychiatric Clinics of North America. 2001;24(2):201-14.
- 5 478 4. Keshaviah A, Edkins K, Hastings ER, Krishna M, Franko DL, Herzog DB, et al. Re-  
6 479 examining premature mortality in anorexia nervosa: a meta-analysis redux. Compr  
7 480 Psychiatry. 2014;55(8):1773-84.
- 8 481 5. Preti A, Rocchi MB, Sisti D, Camboni MV, Miotto P. A comprehensive meta-analysis  
9 482 of the risk of suicide in eating disorders. Acta Psychiatr Scand. 2011;124(1):6-17.
- 10 483 6. Crow SJ, Peterson CB, Swanson SA, Raymond NC, Specker S, Eckert ED, et al.  
11 484 Increased mortality in bulimia nervosa and other eating disorders. Am J Psychiatry.  
12 485 2009;166(12):1342-6.
- 13 486 7. Kostro K, Lerman JB, Attia E. The current status of suicide and self-injury in eating  
14 487 disorders: a narrative review. Journal of Eating Disorders. 2014;2(1):19.
- 15 488 8. Hamza CA, Stewart SL, Willoughby T. Examining the link between nonsuicidal self-  
16 489 injury and suicidal behavior: a review of the literature and an integrated model. Clin Psychol  
17 490 Rev. 2012;32(6):482-95.
- 18 491 9. Brown RC, Plener PL. Non-suicidal Self-Injury in Adolescence. Curr Psychiatry Rep.  
19 492 2017;19(3):20.
- 20 493 10. McCullumsmith C. Laying the groundwork for standardized assessment of suicidal  
21 494 behavior. J Clin Psychiatry. 2015;76(10):e1333-5.
- 22 495 11. Gairin I, House A, Owens D. Attendance at the accident and emergency department in  
23 496 the year before suicide: Retrospective study. British Journal of Psychiatry. 2003;183(1):28-  
24 497 33.
- 25 498 12. Foster T, Gillespie K, McClelland R. Mental disorders and suicide in Northern  
26 499 Ireland. Br J Psychiatry. 1997;170:447-52.
- 30 500 13. Nock MK, Borges G, Bromet EJ, Alonso J, Angermeyer M, Beautrais A, et al. Cross-  
31 501 national prevalence and risk factors for suicidal ideation, plans and attempts. Br J Psychiatry.  
32 502 2008;192(2):98-105.
- 33 503 14. Swanson SA, Crow SJ, Le Grange D, Swendsen J, Merikangas KR. Prevalence and  
34 504 correlates of eating disorders in adolescents. Results from the national comorbidity survey  
35 505 replication adolescent supplement. Arch Gen Psychiatry. 2011;68(7):714-23.
- 36 506 15. Claes L, Vandereycken W, Vertommen H. Self-injurious behaviors in eating-  
37 507 disordered patients. Eat Behav. 2001;2(3):263-72.
- 38 508 16. Cipriano A, Cella S, Cotrufo P. Nonsuicidal Self-injury: A Systematic Review. Front  
39 509 Psychol. 2017;8:1946.
- 40 510 17. Cliffe C, Shetty H, Himmerich H, Schmidt U, Stewart R, Dutta R. Suicide attempts  
41 511 requiring hospitalization in patients with eating disorders: a retrospective cohort study.  
42 512 International journal of eating disorders. 2020; ePub(ePub):ePub-ePub.
- 43 513 18. Svirko E, Hawton K. Self-injurious behavior and eating disorders: the extent and  
44 514 nature of the association. Suicide Life Threat Behav. 2007;37(4):409-21.
- 45 515 19. Claes L, Fernández-Aranda F, Jimenez-Murcia S, Botella C, Casanueva FF, de la  
46 516 Torre R, et al. Co-occurrence of non-suicidal self-injury and impulsivity in extreme weight  
47 517 conditions. Personality and Individual Differences. 2013;54(1):137-40.
- 48 518 20. Cucchi A, Ryan D, Konstantakopoulos G, Stroumpa S, Kaçar A, Renshaw S, et al.  
49 519 Lifetime prevalence of non-suicidal self-injury in patients with eating disorders: a systematic  
50 520 review and meta-analysis. Psychol Med. 2016;46(7):1345-58.
- 51 521 21. Forcano L, Álvarez E, Santamaría JJ, Jimenez-Murcia S, Granero R, Penelo E, et al.  
52 522 Suicide attempts in anorexia nervosa subtypes. Comprehensive Psychiatry. 2011;52(4):352-8.
- 53 523 22. Forrest LN, Zuromski KL, Dodd DR, Smith AR. Suicidality in adolescents and adults  
54 524 with binge-eating disorder: Results from the national comorbidity survey replication and  
55 525 adolescent supplement. International Journal of Eating Disorders. 2017;50(1):40-9.

[Type here]

- 1  
2  
3 526 23. Franko DL, Keel PK, Dorer DJ, Blais MA, Delinsky SS, Eddy KT, et al. What  
4 527 predicts suicide attempts in women with eating disorders? *Psychol Med.* 2004;34(5):843-53.  
5 528 24. Favaro A, Santonastaso P. Suicidality in eating disorders: clinical and psychological  
6 529 correlates. *Acta Psychiatr Scand.* 1997;95(6):508-14.  
7 530 25. Franko DL, Keel PK. Suicidality in eating disorders: occurrence, correlates, and  
8 531 clinical implications. *Clin Psychol Rev.* 2006;26(6):769-82.  
9 532 26. Goldstein A, Gvion Y. Socio-demographic and psychological risk factors for suicidal  
10 533 behavior among individuals with anorexia and bulimia nervosa: A systematic review. *J*  
11 534 *Affect Disord.* 2019;245:1149-67.  
12 535 27. Mayes SD, Fernandez-Mendoza J, Baweja R, Calhoun S, Mahr F, Aggarwal R, et al.  
13 536 Correlates of suicide ideation and attempts in children and adolescents with eating disorders.  
14 537 *Eat Disord.* 2014;22(4):352-66.  
15 538 28. Bulik CM, Thornton L, Pinheiro AP, Plotnicov K, Klump KL, Brandt H, et al. Suicide  
16 539 attempts in anorexia nervosa. *Psychosom Med.* 2008;70(3):378-83.  
17 540 29. Vieira AI, Machado BC, Machado PPP, Brandão I, Roma-Torres A, Gonçalves S.  
18 541 Putative Risk Factors for Non-Suicidal Self-Injury in Eating Disorders. *Eur Eat Disord Rev.*  
19 542 2017;25(6):544-50.  
20 543 30. Barak-Corren Y, Castro VM, Javitt S, Hoffnagle AG, Dai Y, Perlis RH, et al.  
21 544 Predicting Suicidal Behavior From Longitudinal Electronic Health Records. *Am J Psychiatry.*  
22 545 2017;174(2):154-62.  
23 546 31. Fernandes AC, Dutta R, Velupillai S, Sanyal J, Stewart R, Chandran D. Identifying  
24 547 Suicide Ideation and Suicidal Attempts in a Psychiatric Clinical Research Database using  
25 548 Natural Language Processing. *Scientific Reports.* 2018;8(1):7426.  
26 549 32. Spasic I, Nenadic G. Clinical Text Data in Machine Learning: Systematic Review.  
27 550 *JMIR Med Inform.* 2020;8(3):e17984.  
28 551 33. Haerian K, Salmasian H, Friedman C. Methods for identifying suicide or suicidal  
29 552 ideation in EHRs. *AMIA Annu Symp Proc.* 2012;2012:1244-53.  
30 553 34. Downs J, Velupillai S, George G, Holden R, Kikoler M, Dean H, et al. Detection of  
31 554 Suicidality in Adolescents with Autism Spectrum Disorders: Developing a Natural Language  
32 555 Processing Approach for Use in Electronic Health Records. *AMIA Annu Symp Proc.*  
33 556 2017;2017:641-9.  
34 557 35. Velupillai S, Epstein S, Bittar A, Stephenson T, Dutta R, Downs J. Identifying  
35 558 Suicidal Adolescents from Mental Health Records Using Natural Language Processing. *Stud*  
36 559 *Health Technol Inform.* 2019;264:413-7.  
37 560 36. Ayre KaD, Rina and Bittar, Andre and Pritchard, Megan and Howard, Louise, .  
38 561 Suicide and Self-Harm in Women with Mental Disorders During Pregnancy and the Year  
39 562 after Birth. Available at SSRN: <https://ssrn.com/abstract=3687375> or  
40 563 <http://dx.doi.org/10.2139/ssrn.3687375>. 2020.  
41 564 37. Stewart R, Soremekun M, Perera G, Broadbent M, Callard F, Denis M, et al. The  
42 565 South London and Maudsley NHS Foundation Trust Biomedical Research Centre (SLAM  
43 566 BRC) case register: development and descriptive data. *BMC Psychiatry.* 2009;9(1):51.  
44 567 38. World Health Organization. (2004). ICD-10 : international statistical classification of  
45 568 diseases and related health problems : tenth revision neWHO.  
46 569 39. Jackson RG, Patel R, Jayatilleke N, Kolliakou A, Ball M, Gorrell G, et al. Natural  
47 570 language processing to extract symptoms of severe mental illness from clinical text: the  
48 571 Clinical Record Interactive Search Comprehensive Data Extraction (CRIS-CODE) project.  
49 572 *BMJ Open.* 2017;7(1):e012012.  
50 573 40. Ayre K, Bittar A, Kam J, Verma S, Howard LM, Dutta R. Developing a Natural  
51 574 Language Processing tool to identify perinatal self-harm in electronic healthcare records.  
52 575 *PLOS ONE.* 2021;16(8):e0253809.

[Type here]

- 1  
2  
3 576 41. McHugh ML. Interrater reliability: the kappa statistic. *Biochem Med (Zagreb)*.  
4 577 2012;22(3):276-82.
- 5 578 42. Milos G, Spindler A, Hepp U, Schnyder U. Suicide attempts and suicidal ideation:  
6 579 Links with psychiatric comorbidity in eating disorder subjects. *General Hospital Psychiatry*.  
7 580 2004;26(2):129-35.
- 8 581 43. Rihmer Z. Can better recognition and treatment of depression reduce suicide rates? A  
9 582 brief review. *European Psychiatry*. 2001;16(7):406-9.
- 10 583 44. Nakar O, Brunner R, Schilling O, Chanen A, Fischer G, Parzer P, et al.  
11 584 Developmental trajectories of self-injurious behavior, suicidal behavior and substance misuse  
12 585 and their association with adolescent borderline personality pathology. *Journal of Affective*  
13 586 *Disorders*. 2016;197:231-8.
- 14 587 45. Reas DL, Pedersen G, Karterud S, Rø Ø. Self-harm and suicidal behavior in  
15 588 borderline personality disorder with and without bulimia nervosa. *J Consult Clin Psychol*.  
16 589 2015;83(3):643-8.
- 17 590 46. Muehlenkamp JJ, Takakuni S, Brausch AM, Peyerl N. Behavioral functions  
18 591 underlying NSSI and eating disorder behaviors. *J Clin Psychol*. 2019;75(7):1219-32.
- 19 592 47. Peterson CM, Van Diest AMK, Mara CA, Matthews A. Dialectical behavioral therapy  
20 593 skills group as an adjunct to family-based therapy in adolescents with restrictive eating  
21 594 disorders. *Eat Disord*. 2020;28(1):67-79.
- 22 595 48. Fischer S, Peterson C. Dialectical behavior therapy for adolescent binge eating,  
23 596 purging, suicidal behavior, and non-suicidal self-injury: a pilot study. *Psychotherapy (Chic)*.  
24 597 2015;52(1):78-92.
- 25 598 49. Fichter MM, Quadflieg N, Rief W. Course of multi-impulsive bulimia. *Psychological*  
26 599 *Medicine*. 1994;24(3):591-604.
- 30 600 50. Lacey JH. Self-damaging and addictive behaviour in bulimia nervosa. A catchment  
31 601 area study. *Br J Psychiatry*. 1993;163:190-4.
- 32 602 51. Fedorowicz VJ, Falissard B, Foulon C, Dardennes R, Divac SM, Guelfi JD, et al.  
33 603 Factors associated with suicidal behaviors in a large French sample of inpatients with eating  
34 604 disorders. *Int J Eat Disord*. 2007;40(7):589-95.
- 35 605 52. Maser JD, Akiskal HS, Schettler P, Scheftner W, Mueller T, Endicott J, et al. Can  
36 606 temperament identify affectively ill patients who engage in lethal or near-lethal suicidal  
37 607 behavior? A 14-year prospective study. *Suicide Life Threat Behav*. 2002;32(1):10-32.
- 38 608 53. Conner KR, Duberstein PR, Conwell Y, Seidlitz L, Caine ED. Psychological  
39 609 vulnerability to completed suicide: a review of empirical studies. *Suicide Life Threat Behav*.  
40 610 2001;31(4):367-85.
- 41 611 54. Mandelli L, Arminio A, Atti AR, De Ronchi D. Suicide attempts in eating disorder  
42 612 subtypes: a meta-analysis of the literature employing DSM-IV, DSM-5, or ICD-10 diagnostic  
43 613 criteria. *Psychol Med*. 2019;49(8):1237-49.
- 44 614 55. Eddy KT, Dorer DJ, Franko DL, Tahilani K, Thompson-Brenner H, Herzog DB.  
45 615 Diagnostic crossover in anorexia nervosa and bulimia nervosa: implications for DSM-V. *Am*  
46 616 *J Psychiatry*. 2008;165(2):245-50.
- 47 617 56. Pisetsky EM, Thornton LM, Lichtenstein P, Pedersen NL, Bulik CM. Suicide  
48 618 attempts in women with eating disorders. *J Abnorm Psychol*. 2013;122(4):1042-56.
- 49 619 57. Smith AR, Ortiz SN, Forrest LN, Velkoff EA, Dodd DR. Which Comes First? An  
50 620 Examination of Associations and Shared Risk Factors for Eating Disorders and Suicidality.  
51 621 *Curr Psychiatry Rep*. 2018;20(9):77.
- 52 622 58. Yao S, Kuja-Halkola R, Thornton LM, Runfolo CD, D'Onofrio BM, Almqvist C, et  
53 623 al. Familial Liability for Eating Disorders and Suicide Attempts: Evidence From a Population  
54 624 Registry in Sweden. *JAMA Psychiatry*. 2016;73(3):284-91.

[Type here]

- 1  
2  
3 625 59. Dodd DR, Smith AR, Forrest LN, Witte TK, Bodell L, Bartlett M, et al. Interoceptive  
4 626 Deficits, Nonsuicidal Self-Injury, and Suicide Attempts Among Women with Eating  
5 627 Disorders. *Suicide and Life-Threatening Behavior*. 2018;48(4):438-48.  
6  
7 628 60. Van Orden KA, Witte TK, Cukrowicz KC, Braithwaite SR, Selby EA, Joiner TE, Jr.  
8 629 The interpersonal theory of suicide. *Psychol Rev*. 2010;117(2):575-600.  
9 630 61. Forrest LN, Bodell LP, Witte TK, Goodwin N, Bartlett ML, Siegfried N, et al.  
10 631 Associations between eating disorder symptoms and suicidal ideation through thwarted  
11 632 belongingness and perceived burdensomeness among eating disorder patients. *Journal of*  
12 633 *Affective Disorders*. 2016;195:127-35.  
13 634

14  
15  
16  
17  
18  
19  
20  
21  
22  
23  
24  
25  
26  
27  
28  
29  
30  
31  
32  
33  
34  
35  
36  
37  
38  
39  
40  
41  
42  
43  
44  
45  
46  
47  
48  
49  
50  
51  
52  
53  
54  
55  
56  
57  
58  
59  
60

For peer review only

[Type here]

## Supplementary File Figure 1

**Figure 1: Workflow for validation of both NLP tools**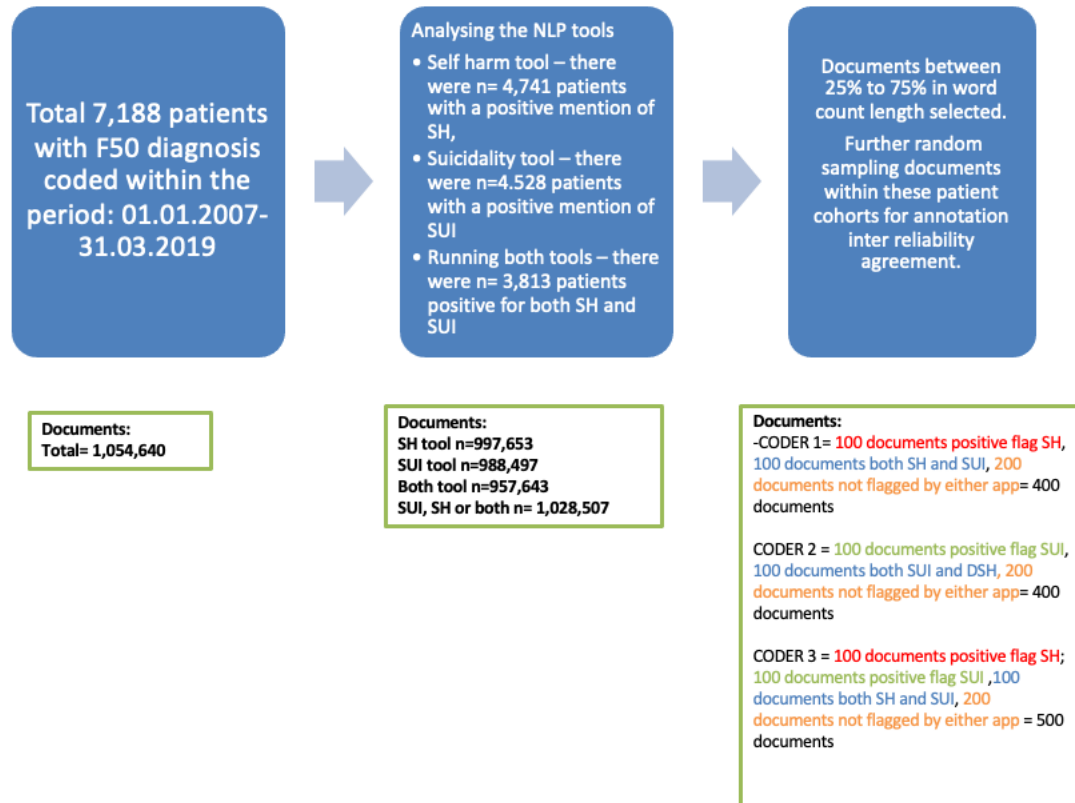

STROBE Statement—Checklist of items that should be included in reports of *cohort studies*

|                              | Item No | Recommendation                                                                                                                                                                                                                                                                                                         | Page No |
|------------------------------|---------|------------------------------------------------------------------------------------------------------------------------------------------------------------------------------------------------------------------------------------------------------------------------------------------------------------------------|---------|
| <b>Title and abstract</b>    | 1       | (a) Indicate the study's design with a commonly used term in the title or the abstract<br>(b) Provide in the abstract an informative and balanced summary of what was done and what was found                                                                                                                          | 1       |
| <b>Introduction</b>          |         |                                                                                                                                                                                                                                                                                                                        |         |
| Background/rationale         | 2       | Explain the scientific background and rationale for the investigation being reported                                                                                                                                                                                                                                   | 2       |
| Objectives                   | 3       | State specific objectives, including any prespecified hypotheses                                                                                                                                                                                                                                                       | 2       |
| <b>Methods</b>               |         |                                                                                                                                                                                                                                                                                                                        |         |
| Study design                 | 4       | Present key elements of study design early in the paper                                                                                                                                                                                                                                                                | 3       |
| Setting                      | 5       | Describe the setting, locations, and relevant dates, including periods of recruitment, exposure, follow-up, and data collection                                                                                                                                                                                        | 3       |
| Participants                 | 6       | (a) Give the eligibility criteria, and the sources and methods of selection of participants. Describe methods of follow-up<br>(b) For matched studies, give matching criteria and number of exposed and unexposed                                                                                                      | 3       |
| Variables                    | 7       | Clearly define all outcomes, exposures, predictors, potential confounders, and effect modifiers. Give diagnostic criteria, if applicable                                                                                                                                                                               | 3       |
| Data sources/<br>measurement | 8*      | For each variable of interest, give sources of data and details of methods of assessment (measurement). Describe comparability of assessment methods if there is more than one group                                                                                                                                   | 3       |
| Bias                         | 9       | Describe any efforts to address potential sources of bias                                                                                                                                                                                                                                                              | 4       |
| Study size                   | 10      | Explain how the study size was arrived at                                                                                                                                                                                                                                                                              | 4       |
| Quantitative variables       | 11      | Explain how quantitative variables were handled in the analyses. If applicable, describe which groupings were chosen and why                                                                                                                                                                                           | 5       |
| Statistical methods          | 12      | (a) Describe all statistical methods, including those used to control for confounding<br>(b) Describe any methods used to examine subgroups and interactions<br>(c) Explain how missing data were addressed<br>(d) If applicable, explain how loss to follow-up was addressed<br>(e) Describe any sensitivity analyses | 5       |
| <b>Results</b>               |         |                                                                                                                                                                                                                                                                                                                        |         |
| Participants                 | 13*     | (a) Report numbers of individuals at each stage of study—eg numbers potentially eligible, examined for eligibility, confirmed eligible, included in the study, completing follow-up, and analysed<br>(b) Give reasons for non-participation at each stage<br>(c) Consider use of a flow diagram                        | 5-6     |
| Descriptive data             | 14*     | (a) Give characteristics of study participants (eg demographic, clinical, social) and information on exposures and potential confounders<br>(b) Indicate number of participants with missing data for each variable of interest<br>(c) Summarise follow-up time (eg, average and total amount)                         | 5-6     |
| Outcome data                 | 15*     | Report numbers of outcome events or summary measures over time                                                                                                                                                                                                                                                         | 7       |



|    |                          |    |                                                                                                                                                                                                              |     |
|----|--------------------------|----|--------------------------------------------------------------------------------------------------------------------------------------------------------------------------------------------------------------|-----|
| 1  | Main results             | 16 | (a) Give unadjusted estimates and, if applicable, confounder-adjusted estimates and their precision (eg, 95% confidence interval). Make clear which confounders were adjusted for and why they were included | 5-7 |
| 2  |                          |    | (b) Report category boundaries when continuous variables were categorized                                                                                                                                    |     |
| 3  |                          |    | (c) If relevant, consider translating estimates of relative risk into absolute risk for a meaningful time period                                                                                             |     |
| 4  |                          |    |                                                                                                                                                                                                              |     |
| 5  |                          |    |                                                                                                                                                                                                              |     |
| 6  |                          |    |                                                                                                                                                                                                              |     |
| 7  |                          |    |                                                                                                                                                                                                              |     |
| 8  |                          |    |                                                                                                                                                                                                              |     |
| 9  | Other analyses           | 17 | Report other analyses done—eg analyses of subgroups and interactions, and sensitivity analyses                                                                                                               | 5-7 |
| 10 |                          |    |                                                                                                                                                                                                              |     |
| 11 | <b>Discussion</b>        |    |                                                                                                                                                                                                              |     |
| 12 |                          |    |                                                                                                                                                                                                              |     |
| 13 | Key results              | 18 | Summarise key results with reference to study objectives                                                                                                                                                     | 7-8 |
| 14 | Limitations              | 19 | Discuss limitations of the study, taking into account sources of potential bias or imprecision. Discuss both direction and magnitude of any potential bias                                                   | 8   |
| 15 |                          |    |                                                                                                                                                                                                              |     |
| 16 | Interpretation           | 20 | Give a cautious overall interpretation of results considering objectives, limitations, multiplicity of analyses, results from similar studies, and other relevant evidence                                   | 8   |
| 17 |                          |    |                                                                                                                                                                                                              |     |
| 18 |                          |    |                                                                                                                                                                                                              |     |
| 19 | Generalisability         | 21 | Discuss the generalisability (external validity) of the study results                                                                                                                                        | 8   |
| 20 |                          |    |                                                                                                                                                                                                              |     |
| 21 | <b>Other information</b> |    |                                                                                                                                                                                                              |     |
| 22 | Funding                  | 22 | Give the source of funding and the role of the funders for the present study and, if applicable, for the original study on which the present article is based                                                | 9   |
| 23 |                          |    |                                                                                                                                                                                                              |     |
| 24 |                          |    |                                                                                                                                                                                                              |     |

25  
26 \*Give information separately for exposed and unexposed groups.

27  
28 **Note:** An Explanation and Elaboration article discusses each checklist item and gives methodological background and  
29 published examples of transparent reporting. The STROBE checklist is best used in conjunction with this article (freely  
30 available on the Web sites of PLoS Medicine at <http://www.plosmedicine.org/>, Annals of Internal Medicine at  
31 <http://www.annals.org/>, and Epidemiology at <http://www.epidem.com/>). Information on the STROBE Initiative is  
32 available at <http://www.strobe-statement.org>.  
33  
34  
35  
36  
37  
38  
39  
40  
41  
42  
43  
44  
45  
46  
47  
48  
49  
50  
51  
52  
53  
54  
55  
56  
57  
58  
59  
60
